# Supplementary material for: Enforced miR-144-5p Expression Sensitizes Erastin-Induced Ferroptosis via Targeting Nrf2 in Gastric Cancer Cells
Source: Research Square preprint supplement (doi:10.21203/rs.3.rs-150859/v1), 2021-01-21
Supplement: Supplementary file 1 [file 07083729e2bacef6771e22d3.xlsx]

## Sheet: Sheet1
miRNA	RefseqID	GeneSymbol	Score	Position	Binding Site	Au	Me	N Pairings	Targetscan	Mirdb	Mirtarbase
hsa-miR-144-5p	NM_001170640	CDK20	1	3UTR	16431659	0.59	-7.271	15	—	—	—
hsa-miR-144-5p	NM_001170639	CDK20	1	3UTR	17391755	0.59	-7.271	15	—	—	—
hsa-miR-144-5p	NM_012119	CDK20	1	3UTR	17671783	0.59	-7.271	15	—	—	—
hsa-miR-144-5p	NM_001039803	CDK20	1	3UTR	18301846	0.59	-7.271	15	—	—	—
hsa-miR-144-5p	NM_001012994	SNX30	1	3UTR	69836994	0.59	-13.224	10	—	—	—
hsa-miR-144-5p	NM_020746	MAVS	1	3UTR	1169411707	0.62	-7.052	12	—	—	—
hsa-miR-144-5p	NM_080627	SOGA1	1	3UTR	1210312147	0.62	-4.906	14	—	—	—
hsa-miR-144-5p	NM_001352385	STK4	1	3UTR	22942306	0.56	-10.399	11	—	—	—
hsa-miR-144-5p	NM_006282	STK4	1	3UTR	21992211	0.56	-10.399	11	—	—	—
hsa-miR-144-5p	NM_003722	TP63	1	3UTR	46164654	0.72	-6.107	17	—	—	—
hsa-miR-144-5p	NM_001114978	TP63	1	3UTR	45224560	0.72	-6.107	17	—	—	—
hsa-miR-144-5p	NM_001329144	TP63	1	3UTR	43774415	0.72	-6.107	17	—	—	—
hsa-miR-144-5p	NM_001329148	TP63	1	3UTR	46044642	0.72	-6.107	17	—	—	—
hsa-miR-144-5p	NM_001146686	GMNC	1	3UTR	33283343	0.62	-7.938	13	—	—	—
hsa-miR-144-5p	NM_130837	OPA1	1	3UTR	54565499	0.69	-5.227	17	—	—	—
hsa-miR-144-5p	NM_015560	OPA1	1	3UTR	52915334	0.69	-5.227	17	—	—	—
hsa-miR-144-5p	NM_130835	OPA1	1	3UTR	53485391	0.69	-5.227	17	—	—	—
hsa-miR-144-5p	NM_130833	OPA1	1	3UTR	52945337	0.69	-5.227	17	—	—	—
hsa-miR-144-5p	NM_052964	CLNK	1	3UTR	30093061	0.66	-5.036	17	—	—	—
hsa-miR-144-5p	NM_148894	BOD1L1	1	3UTR	1034210367	0.72	-13.615	17	—	—	—
hsa-miR-144-5p	NM_015230	ARAP2	1	3UTR	68536872	0.65	-6.515	17	—	—	—
hsa-miR-144-5p	NM_014636	RALGPS1	1	3UTR	33793400	0.52	-8.418	18	—	—	—
hsa-miR-144-5p	NM_022779	DDX31	1	3UTR	27502768	0.47	-13.697	14	—	—	—
hsa-miR-144-5p	NM_001195685	LYPD6	1	3UTR	22712296	0.54	-7.052	12	—	—	—
hsa-miR-144-5p	NM_194317	LYPD6	1	3UTR	22612286	0.54	-7.052	12	—	—	—
hsa-miR-144-5p	XM_024452699	LYPD6	1	3UTR	46354660	0.54	-7.052	12	—	—	—
hsa-miR-144-5p	NM_001278549	PDK1	1	3UTR	31343179	0.54	-6.618	18	—	—	—
hsa-miR-144-5p	NM_002610	PDK1	1	3UTR	30743119	0.54	-6.618	18	—	—	—
hsa-miR-144-5p	NM_001267050	GPR155	1	3UTR	48994917	0.56	-5.837	16	—	—	—
hsa-miR-144-5p	NM_006164	NFE2L2	1	3UTR	26662687	0.77	-4.957	17	—	—	—
hsa-miR-144-5p	NM_001261424	PPP1R1C	1	3UTR	23002325	0.6	-12.378	19	—	—	—
hsa-miR-144-5p	NM_001261425	PPP1R1C	1	3UTR	22792304	0.6	-12.378	19	—	—	—
hsa-miR-144-5p	NM_024648	OGFOD3	1	3UTR	32633285	0.53	-5.082	19	—	—	—
hsa-miR-144-5p	NM_001112734	ZSCAN30	1	3UTR	25532576	0.59	-4.673	16	—	—	—
hsa-miR-144-5p	NM_001166012	ZSCAN30	1	3UTR	27572780	0.59	-4.673	16	—	—	—
hsa-miR-144-5p	NM_145756	ZNF396	1	3UTR	25992616	0.68	-8.057	16	—	—	—
hsa-miR-144-5p	NM_001322286	ZNF396	1	3UTR	34693486	0.68	-8.057	16	—	—	—
hsa-miR-144-5p	NM_001243230	TCF4	1	3UTR	55825603	0.62	-6.217	17	—	—	—
hsa-miR-144-5p	NM_001330605	TCF4	1	3UTR	55385559	0.62	-6.217	17	—	—	—
hsa-miR-144-5p	NM_001243235	TCF4	1	3UTR	51385159	0.62	-6.217	17	—	—	—
hsa-miR-144-5p	NM_001348215	TCF4	1	3UTR	51045125	0.62	-6.217	17	—	—	—
hsa-miR-144-5p	NM_001348652	ANKRD9	1	3UTR	45684589	0.47	-7.396	18	—	—	—
hsa-miR-144-5p	XM_005267310	ANKRD9	1	3UTR	53595403	0.47	-7.396	18	—	—	—
hsa-miR-144-5p	NM_001242787	BRF1	1	3UTR	21232134	0.34	-13.224	10	—	—	—
hsa-miR-144-5p	NM_001242786	BRF1	1	3UTR	21892200	0.34	-13.224	10	—	—	—
hsa-miR-144-5p	NM_001242789	BRF1	1	3UTR	16131624	0.34	-13.224	10	—	—	—
hsa-miR-144-5p	NM_018097	HAUS2	1	3UTR	28392887	0.65	-5.101	18	—	—	—
hsa-miR-144-5p	NM_001130447	HAUS2	1	3UTR	27462794	0.65	-5.101	18	—	—	—
hsa-miR-144-5p	NM_014080	DUOX2	1	3UTR	50365076	0.59	-5.227	20	—	—	—
hsa-miR-144-5p	NM_014548	TMOD2	1	3UTR	22642283	0.66	-11.501	16	—	—	—
hsa-miR-144-5p	NM_001142885	TMOD2	1	3UTR	21562175	0.66	-11.501	16	—	—	—
hsa-miR-144-5p	XM_024450526	GJC1	1	3UTR	45984636	0.62	-6.574	18	—	—	—
hsa-miR-144-5p	NM_001080383	GJC1	1	3UTR	47484786	0.62	-6.574	18	—	—	—
hsa-miR-144-5p	NM_005497	GJC1	1	3UTR	47524790	0.62	-6.574	18	—	—	—
hsa-miR-144-5p	NM_016841	MAPT	1	3UTR	35283558	0.43	-13.224	10	—	—	—
hsa-miR-144-5p	NM_001195192	EFCAB13	1	3UTR	31223136	0.56	-5.763	13	—	—	—
hsa-miR-144-5p	NM_016428	ABI3	1	3UTR	18881899	0.5	-13.224	10	—	—	—
hsa-miR-144-5p	NM_001135186	ABI3	1	3UTR	18701881	0.5	-13.224	10	—	—	—
hsa-miR-144-5p	NM_183416	KIF1B	1	3UTR	56545669	0.54	-4.906	14	—	—	—
hsa-miR-144-5p	NM_138346	KIAA2013	1	3UTR	25482559	0.35	-13.224	10	—	—	—
hsa-miR-144-5p	XM_017014003	ARHGEF10	1	3UTR	42364282	0.5	-3.938	19	—	—	—
hsa-miR-144-5p	NM_024607	PPP1R3B	1	3UTR	53175336	0.56	-5.386	17	—	—	—
hsa-miR-144-5p	NM_001978	DMTN	1	3UTR	26262681	0.59	-5.18	15	—	Link	—
hsa-miR-144-5p	NM_001302816	DMTN	1	3UTR	25602615	0.59	-5.18	15	—	Link	—
hsa-miR-144-5p	NM_001114138	DMTN	1	3UTR	24272482	0.59	-5.18	15	—	Link	—
hsa-miR-144-5p	NM_001195104	GSR	1	3UTR	24872502	0.56	-6.07	13	—	—	—
hsa-miR-144-5p	NM_001195102	GSR	1	3UTR	26462661	0.56	-6.07	13	—	—	—
hsa-miR-144-5p	NM_001195103	GSR	1	3UTR	25742589	0.56	-6.07	13	—	—	—
hsa-miR-144-5p	NM_000637	GSR	1	3UTR	27332748	0.56	-6.07	13	—	—	—
hsa-miR-144-5p	NM_017778	NSD3	1	3UTR	30363056	0.59	-5.763	13	—	—	—
hsa-miR-144-5p	NM_031301	APH1B	1	3UTR	35153528	0.65	-7.052	12	—	—	—
hsa-miR-144-5p	NM_001145646	APH1B	1	3UTR	33923405	0.65	-7.052	12	—	—	—
hsa-miR-144-5p	XM_024450085	APH1B	1	3UTR	34653478	0.65	-7.052	12	—	—	—
hsa-miR-144-5p	NM_024776	PEAK1	1	3UTR	1130711325	0.56	-6.895	17	—	—	—
hsa-miR-144-5p	NM_015079	TBC1D2B	0.96	3UTR	56665684	0.54	-6.092	17	—	—	—
hsa-miR-144-5p	NM_144572	TBC1D2B	0.96	3UTR	57185736	0.54	-6.092	17	—	—	—
hsa-miR-144-5p	XM_011524428	ANKFN1	1	3UTR	84908515	0.59	-3.793	18	—	—	—
hsa-miR-144-5p	NM_030938	VMP1	1	3UTR	17471770	0.54	-6.283	19	—	—	—
hsa-miR-144-5p	NM_001329402	VMP1	1	3UTR	16111634	0.54	-6.283	19	—	—	—
hsa-miR-144-5p	NM_001330413	BCAS3	1	3UTR	36893704	0.64	-14.554	14	—	—	—
