# Supplementary material for: Enforced miR-144-5p Expression Sensitizes Erastin-Induced Ferroptosis via Targeting Nrf2 in Gastric Cancer Cells
Source: Research Square preprint supplement (doi:10.21203/rs.3.rs-150859/v1), 2021-01-21
Supplement: Supplementary file 2 [file f01ecb37351dd4afe9352bfb.xlsx]

## Sheet: Sheet1
ID	adj.P.Val	P.Value	t	B	logFC	GB_ACC	GI	Gene.Symbol	SPOT_ID
11720051_at	0.00199	5.94e-08	-16.3589	6.5165	-0.958045	NM_004598.3		SPOCK1
11721686_at	0.00199	8.07e-08	15.7899	6.3804	0.954762	NM_205841.2		SPINK6
11757913_x_at	0.00472	2.87e-07	13.6214	5.7557	0.761246	BX445017		TUBA1A
11736061_a_at	0.0062	5.02e-07	-12.7545	5.4488	-1.0582	NM_002639.4		SERPINB5
11749460_x_at	0.00641	6.49e-07	-12.3751	5.3021	-0.890718	AK300246.1		FN1
11728122_a_at	0.00951	1.15e-06	11.5579	4.9572	0.687723	NM_005756.2		ADGRG2
11758166_s_at	0.01026	1.71e-06	11.0265	4.7097	0.66086	BM677669		ANOS1
11728491_s_at	0.01026	1.87e-06	-10.9087	4.6521	-0.915695	BC060866.1		KANK4
11725910_a_at	0.01026	2.06e-06	-10.7848	4.5904	-0.83181	NM_033641.2		COL4A6
11727362_x_at	0.01026	2.08e-06	10.7746	4.5853	0.771044	NM_006009.2		TUBA1A
11756178_s_at	0.01358	3.08e-06	-10.276	4.3247	-0.65219	BM455070		CMTM6
11745100_a_at	0.01358	3.3e-06	-10.1906	4.2781	-0.969825	BC015877.1		CDH19
11726188_at	0.01511	3.98e-06	9.96281	4.1507	0.699231	NM_001080505.1		SHISA3
11730643_s_at	0.01725	4.89e-06	9.71579	4.0074	1.08789	NM_017863.2		CT55
11724538_a_at	0.01877	5.75e-06	-9.52613	3.8936	-0.60351	BC021281.2		ABCG2
11764077_s_at	0.01877	6.46e-06	-9.39115	3.8106	-0.773987	AW150861		EDIL3
11730650_at	0.01877	6.53e-06	9.37869	3.8028	1.0756	NM_031418.2		ANO3
11734286_a_at	0.01877	6.84e-06	-9.32556	3.7696	-0.554352	BC035923.1		COX7B2
11756177_s_at	0.02023	7.78e-06	-9.17888	3.6764	-0.691315	AF116694.1		CMTM6
11716225_a_at	0.02351	9.94e-06	-8.90631	3.4976	-0.502689	DA593848		LIMA1
11717465_s_at	0.02351	1e-05	-8.8968	3.4912	-0.590889	NM_020169.3		LXN
11725662_a_at	0.02351	1.12e-05	8.77968	3.4118	0.589029	NM_152527.3		SLC16A14
11727731_at	0.02351	1.13e-05	-8.76263	3.4002	-0.507207	NM_145313.2		RASGEF1A
11723077_at	0.02351	1.14e-05	8.75396	3.3942	0.650499	NM_016500.3		PBDC1
11723804_a_at	0.02632	1.33e-05	-8.58829	3.279	-0.638373	U81607.1		AKAP12
11726776_a_at	0.03176	1.68e-05	8.34091	3.1013	0.481875	NM_003394.2		WNT10B
11755975_x_at	0.03176	1.74e-05	-8.30929	3.0781	-0.842314	AJ420562.1		PKIB
11716835_a_at	0.03287	1.88e-05	8.22443	3.0152	0.45467	NM_004753.4		DHRS3
11763760_a_at	0.03287	1.93e-05	8.19956	2.9966	0.548956	AK313837.1		PLVAP
11720146_a_at	0.0346	2.17e-05	8.07772	2.9045	0.727173	NM_004938.2		DAPK1
11717464_at	0.0346	2.2e-05	-8.06353	2.8936	-0.513321	NM_020169.3		LXN
11723078_s_at	0.0346	2.24e-05	8.04645	2.8805	0.907103	NM_016500.3		PBDC1
11728030_a_at	0.03497	2.34e-05	-8.00416	2.848	-0.497537	BC031063.1		IGSF10
11745535_a_at	0.03497	2.41e-05	7.97448	2.825	0.519534	AY043324.1		CRB1
11736247_x_at	0.03507	2.48e-05	-7.94255	2.8002	-0.595643	BQ000019		AMIGO2
11733137_a_at	0.0369	2.71e-05	-7.85569	2.732	-0.531963	NM_031279.3		ETNPPL
11752915_a_at	0.0369	2.76e-05	-7.83623	2.7165	-0.551928	AK297823.1		RYR2
11716694_at	0.04036	3.13e-05	-7.71386	2.6185	-0.429333	AB097016.1		TSPAN6
11745940_a_at	0.04036	3.19e-05	-7.69556	2.6037	-0.635607	BX647406.1		PSD3
11722448_at	0.04084	3.31e-05	-7.65928	2.5742	-0.566365	AF160967.1		KCNMB4
11728492_at	0.04112	3.41e-05	-7.62862	2.5491	-0.759276	NM_181712.4		KANK4
11759595_x_at	0.04133	3.55e-05	-7.5891	2.5166	-0.579742	AY371042.1		ERVK-6
11732719_at	0.04133	3.6e-05	-7.57741	2.507	-0.634697	NM_001432.2		EREG
11735570_a_at	0.04219	3.76e-05	-7.53512	2.4719	-0.444202	NM_001145671.1		SORBS2
11750736_a_at	0.04224	3.85e-05	-7.51234	2.453	-0.431766	BC020600.1		STEAP4
11731862_at	0.04528	4.22e-05	-7.42473	2.3793	-0.735943	AY358654.1		CDH19
11737962_a_at	0.0455	4.33e-05	7.3997	2.3581	0.605364	NM_001127231.1		AUTS2
11733228_at	0.04588	4.46e-05	-7.37181	2.3343	-0.635106	NM_013369.2		DNMT3L
11744776_a_at	0.04789	4.82e-05	-7.29738	2.2704	-0.436594	CR541907.1		NNMT
11735572_x_at	0.04789	4.85e-05	-7.2926	2.2663	-0.462442	BC011883.1		SORBS2
11752930_a_at	0.05027	5.22e-05	-7.22282	2.2056	-0.499402	AK298032.1		GBP1
11720007_a_at	0.05027	5.29e-05	-7.21036	2.1947	-0.411087	NM_024636.2		STEAP4
11726396_x_at	0.05497	5.9e-05	7.10963	2.1058	0.48132	NM_000216.2		ANOS1
11753942_a_at	0.05692	6.22e-05	-7.06029	2.0617	-0.58505	DQ249310.1		UCA1
11737334_a_at	0.05814	6.47e-05	-7.02398	2.0291	-0.499217	NM_001143668.1		AMIGO2
11719886_a_at	0.0631	7.15e-05	-6.933	1.9464	-0.451881	NM_006417.4		IFI44
11751888_x_at	0.06391	7.38e-05	-6.90536	1.9211	-0.518501	D21337.1		COL4A6
11734396_at	0.06602	7.94e-05	-6.8393	1.8601	-0.510734	NM_017878.1		HRASLS2
11757650_s_at	0.06602	8.01e-05	-6.83048	1.8519	-0.852584	BM997052		FN1
11738209_a_at	0.06602	8.02e-05	6.82994	1.8514	0.376903	NM_005291.1		GPR17
11737948_a_at	0.07425	9.49e-05	6.67955	1.7098	0.42236	BC113738.1		C5
11737723_a_at	0.07425	9.53e-05	6.67617	1.7066	0.546988	NM_152629.3		GLIS3
11732453_s_at	0.07425	9.56e-05	6.67364	1.7042	0.756856	NM_000187.2		HGD
11759868_x_at	0.07425	9.62e-05	-6.66788	1.6987	-0.638068	BC015877.1		CDH19
11730366_at	0.07528	9.91e-05	-6.64212	1.6741	-0.494604	BC003020.1		ZNF557
11728921_at	0.07633	0.000105	6.58794	1.622	0.505108	NM_033427.2		CTTNBP2
11733312_a_at	0.07633	0.000106	-6.57963	1.6139	-0.388106	BC036674.2		PCDHA1 /// PCDHA10 /// PCDHA11 /// PCDHA12 /// PCDHA13 /// PCDHA2 /// PCDHA3 /// PCDHA4 /// PCDHA5 /// PCDHA6 /// PCDHA7 /// PCDHA8 /// PCDHA9 /// PCDHAC1 /// PCDHAC2
11752931_x_at	0.07633	0.000107	-6.57641	1.6108	-0.412174	AK298032.1		GBP1
11732486_a_at	0.07633	0.000107	6.57573	1.6102	0.407046	NM_178125.2		TRIM50
11757406_s_at	0.07633	0.00011	-6.55433	1.5894	-0.477952	AI806915		NEK1
11757418_a_at	0.07633	0.00011	-6.55261	1.5878	-0.732347	N67770		PMEL
11757828_s_at	0.07936	0.000116	-6.50642	1.5427	-0.388132	AI494014		ATG5
11737365_a_at	0.07936	0.000117	-6.49464	1.5312	-0.436913	AW136168		PCDHA1 /// PCDHA10 /// PCDHA11 /// PCDHA12 /// PCDHA13 /// PCDHA2 /// PCDHA3 /// PCDHA4 /// PCDHA5 /// PCDHA6 /// PCDHA7 /// PCDHA8 /// PCDHA9 /// PCDHAC1 /// PCDHAC2
11720566_at	0.07955	0.000121	-6.47009	1.5071	-0.506011	NM_005504.5		BCAT1
11741084_a_at	0.07955	0.000121	-6.46696	1.504	-0.439162	BC030696.1		GABRA1
11716226_a_at	0.07955	0.000123	-6.45105	1.4883	-0.364394	BC136763.1		LIMA1
11758909_at	0.07955	0.000124	-6.4465	1.4838	-0.575481	U39657.1		MAP2K6
11725188_a_at	0.08048	0.000127	-6.42538	1.4629	-0.411577	BX640971.1		ADGRG6
11724606_a_at	0.08066	0.000129	-6.41247	1.4501	-0.402652	U39656.1		MAP2K6
11759594_at	0.08154	0.000132	-6.39241	1.4302	-0.573771	AY371042.1		ERVK-19 /// ERVK-6 /// ERVK-9 /// LOC105369972 /// LOC105376906
11739535_s_at	0.08283	0.000139	-6.34882	1.3866	-0.570666	AK316350.1		FN1
11728302_at	0.08283	0.00014	-6.34159	1.3793	-0.452431	NM_003236.2		TGFA
11729101_a_at	0.08283	0.00014	6.34069	1.3784	0.548152	NM_205845.1		AKR1C2
11715793_a_at	0.08283	0.000144	-6.31984	1.3575	-0.421072	NM_001615.3		ACTG2
11727198_a_at	0.08283	0.000144	-6.31903	1.3566	-0.433971	NM_018902.3		PCDHA1 /// PCDHA10 /// PCDHA11 /// PCDHA12 /// PCDHA13 /// PCDHA2 /// PCDHA3 /// PCDHA4 /// PCDHA5 /// PCDHA6 /// PCDHA7 /// PCDHA8 /// PCDHA9 /// PCDHAC1 /// PCDHAC2
AFFX-r2-Bs-lys-M_at	0.08283	0.000148	-6.29356	1.3309	-0.45447			---	AFFX-r2-Bs-lys-M_at
11743497_at	0.08283	0.000149	-6.2923	1.3297	-0.380294	BX101090		BMP2
11732171_x_at	0.08283	0.000149	-6.28712	1.3244	-0.411465	NM_002092.3		GRSF1
11717822_a_at	0.08283	0.00015	6.28611	1.3234	0.359014	AF069510.1		SLC4A4
11735330_a_at	0.08283	0.000151	6.27736	1.3145	0.358799	NM_001129730.1		ZNF837
11723326_at	0.08283	0.000153	6.26551	1.3025	0.630053	NM_001216.2		CA9
11740489_at	0.08283	0.000157	-6.24776	1.2844	-0.493036	EU927388.1		MAPK9
11717099_at	0.08283	0.000157	-6.24638	1.283	-0.364999	NM_080593.1		HIST1H2BK
11717516_s_at	0.08283	0.000158	6.24188	1.2784	0.422067	NM_025202.2		EFHD1
11726642_a_at	0.08341	0.000162	-6.21915	1.2552	-0.357217	BC014551.1		PEX3
11739880_a_at	0.08341	0.000162	6.21771	1.2538	0.459399	AK096318.1		GLIS3
11726496_at	0.08341	0.000164	-6.20721	1.243	-0.338546	NM_001035.2		RYR2
11763987_a_at	0.08341	0.000166	-6.19982	1.2354	-0.346113	BG218024		VEPH1
11741054_s_at	0.08341	0.000167	-6.19247	1.2279	-0.570398	NM_001122606.1		LAMP2
11718871_x_at	0.08467	0.000173	-6.16391	1.1984	-0.449595	BC012570.1		PALMD
11727197_a_at	0.08467	0.000174	-6.15917	1.1936	-0.487086	R54816		PCDHA1 /// PCDHA10 /// PCDHA11 /// PCDHA12 /// PCDHA13 /// PCDHA2 /// PCDHA3 /// PCDHA4 /// PCDHA5 /// PCDHA6 /// PCDHA7 /// PCDHA8 /// PCDHA9 /// PCDHAC1 /// PCDHAC2
11725002_x_at	0.08467	0.000175	-6.15483	1.1891	-0.366397	NM_024336.2		IRX3
11745289_a_at	0.08495	0.000177	-6.14393	1.1778	-0.360476	AF157325.1		LIMA1
11744104_a_at	0.08504	0.000179	-6.13296	1.1664	-0.374318	BM981967		TMC5
11715466_at	0.08504	0.000185	-6.10669	1.1391	-0.403116	NM_001175.4		ARHGDIB
11743367_a_at	0.08504	0.000187	-6.09872	1.1308	-0.510639	BQ008427		PLCB4
11724239_at	0.08504	0.000188	-6.09317	1.125	-0.463426	BM996339		TCF4
11721297_at	0.08504	0.000189	-6.09107	1.1228	-0.370178	NM_021243.2		ABRACL
11725037_a_at	0.08504	0.00019	-6.08744	1.1191	-0.380884	AK000698.1		SEC23IP
11735571_a_at	0.08504	0.00019	-6.0871	1.1187	-0.469625	BC011883.1		SORBS2
11739262_at	0.08504	0.000191	-6.08087	1.1122	-0.417325	BE966565		VPS4B
11735397_at	0.08619	0.000195	-6.06227	1.0927	-0.399306	NM_001297.4		CNGB1
11733116_a_at	0.08864	0.000203	6.03151	1.0604	0.390786	AK291512.1		CXCR5
11758383_s_at	0.08864	0.000205	-6.0245	1.053	-0.494919	BM968512		USP6NL
11721758_at	0.0889	0.000208	-6.01133	1.0391	-0.415871	NM_031442.3		TMEM47
11721844_a_at	0.0889	0.000209	-6.00781	1.0354	-0.41255	NM_003480.2		MFAP5
11724671_a_at	0.09319	0.000221	5.96205	0.9868	0.650337	NM_152435.2		AMDHD1
11755895_a_at	0.09695	0.000232	-5.9228	0.9449	-0.486568	AK095547.1		FAM129A
11721924_s_at	0.09707	0.000234	-5.91495	0.9365	-0.366973	BC036472.1		PRKCB
11721845_a_at	0.10304	0.00025	-5.85967	0.8769	-0.344344	BX398596		MFAP5
11727141_s_at	0.10552	0.000259	-5.83102	0.8459	-0.466626	NM_012307.2		EPB41L3
11735148_a_at	0.10552	0.000261	-5.82617	0.8406	-0.39053	NM_003877.3		SOCS2
11723327_x_at	0.10552	0.000263	5.82053	0.8345	0.646688	NM_001216.2		CA9
11727199_a_at	0.10621	0.000267	-5.80874	0.8216	-0.408607	CA436984		PCDHA1 /// PCDHA10 /// PCDHA11 /// PCDHA12 /// PCDHA13 /// PCDHA2 /// PCDHA3 /// PCDHA4 /// PCDHA5 /// PCDHA6 /// PCDHA7 /// PCDHA8 /// PCDHA9 /// PCDHAC1 /// PCDHAC2
11741261_a_at	0.10641	0.00027	-5.79789	0.8098	-0.452165	AK296461.1		SORBS2
11745109_a_at	0.10641	0.000271	-5.79434	0.8059	-0.370472	BC028716.2		TMTC1
11727864_a_at	0.10766	0.000277	-5.77862	0.7887	-0.353325	NM_004277.3		SLC25A27
11760508_at	0.1082	0.00028	-5.76831	0.7774	-0.376926	AK295193.1		VRK2
11715507_s_at	0.10907	0.000285	-5.75564	0.7635	-0.337549	NM_001005333.1		MAGED1
11740346_a_at	0.11062	0.000291	5.73779	0.7438	0.498482	L12261.1		NRG1
11757731_s_at	0.11062	0.000293	-5.73208	0.7376	-0.393077	BE789881		RAB31
11724626_a_at	0.11229	0.0003	-5.71404	0.7176	-0.469423	NM_001099222.1		IFT74
11755325_s_at	0.11248	0.000303	5.70668	0.7095	0.386876	AK124701.1		NPTX1
11748016_a_at	0.11276	0.000306	-5.69875	0.7007	-0.378136	AK304523.1		ACTG2
11739117_a_at	0.11391	0.000314	-5.67844	0.6781	-0.523608	AK302799.1		EFR3A
11750257_a_at	0.11391	0.000314	-5.67823	0.6779	-0.435599	L40157.1		EEA1
11723113_a_at	0.11391	0.000316	-5.67274	0.6718	-0.325877	BC041117.1		CENPC
11745682_a_at	0.11391	0.00032	5.66195	0.6598	0.390018	BC101283.2		SERINC5
11716019_at	0.11391	0.000321	-5.66161	0.6594	-0.426646	AF234995.1		RAB31
11754189_s_at	0.11446	0.000325	5.64988	0.6463	0.409789	BM907551		AKR1C1 /// AKR1C2
11748907_a_at	0.11446	0.000327	-5.64644	0.6425	-0.409856	AK293357.1		RARRES3
11742981_a_at	0.11485	0.00033	-5.6382	0.6333	-0.323747	BC007021.1		FABP3
11764204_at	0.11708	0.000339	5.61745	0.61	0.415393	BX100153		---
11741976_at	0.11809	0.000347	5.59846	0.5887	0.343675	NM_013937.2		OR11A1
11724817_a_at	0.11809	0.000347	5.59784	0.588	0.404049	DA161528		SH3KBP1
11728844_at	0.11809	0.000358	-5.57453	0.5617	-0.317386	NM_153256.3		PROSER2
11721846_a_at	0.11809	0.00036	-5.56942	0.5559	-0.319918	U37283.1		MFAP5
11726653_a_at	0.11809	0.00036	-5.56921	0.5557	-0.382648	NM_001142685.1		ARHGAP32
11730580_s_at	0.11809	0.000363	-5.56411	0.5499	-0.511652	NM_020760.1		HECW2
11754466_a_at	0.11809	0.000364	5.56161	0.5471	0.318015	BX647198.1		SH3BP4
11759447_at	0.11809	0.000365	5.56012	0.5454	0.361575	NM_181538.1		GJC3
11726351_at	0.11809	0.000365	-5.55886	0.544	-0.359163	CB240929		EFNA5
11749760_a_at	0.11809	0.000366	-5.55757	0.5425	-0.55282	AK295167.1		GABRB3
11719074_at	0.11955	0.000373	-5.54283	0.5258	-0.352007	BG624037		REEP1
11741205_a_at	0.12132	0.000381	-5.52485	0.5054	-0.521649	AK289792.1		GABRA1
11753058_a_at	0.12132	0.000385	-5.51712	0.4966	-0.421558	BC032302.1		UGGT2
11728945_x_at	0.12132	0.000386	5.51631	0.4956	0.348141	NM_007161.2		LST1
11719247_at	0.12261	0.000392	-5.50307	0.4805	-0.345376	NM_001624.2		AIM1
11762006_at	0.12332	0.000397	5.4935	0.4696	0.350909	AF222345.1		SUFU
11735312_a_at	0.12332	0.000402	5.48415	0.4589	0.379054	AY358760.1		KIRREL3
11727129_at	0.12332	0.000402	-5.48398	0.4587	-0.327601	NM_002364.4		MAGEB2
11738028_a_at	0.12511	0.000411	-5.46633	0.4385	-0.29873	NM_005559.2		LAMA1
11759261_at	0.12511	0.000417	5.45523	0.4257	0.423512	BC136674.1		DCAF12L2
11741056_a_at	0.12511	0.000418	5.45296	0.4231	0.352028	BC025722.1		ADORA2B
11745527_a_at	0.12511	0.000421	-5.44853	0.418	-0.374046	BC005329.1		HSF2
11756703_a_at	0.12511	0.000423	-5.44444	0.4133	-0.420515	AK308128.1		EPS15
11747526_a_at	0.12511	0.000423	-5.44437	0.4132	-0.318855	CR457115.1		TSPAN6
11732827_a_at	0.12546	0.000429	-5.4334	0.4006	-0.365085	NM_001031709.1		RNLS
11758648_s_at	0.12546	0.000429	-5.43303	0.4001	-0.423546	N25679		KCTD10
11739910_a_at	0.12604	0.000434	-5.4249	0.3908	-0.370484	BC001305.1		ELOVL6
11744810_a_at	0.12692	0.000439	-5.41498	0.3793	-0.325743	BC036731.1		ZBTB24
11755543_a_at	0.129	0.000449	-5.39797	0.3596	-0.520879	AK131202.1		TMC5
11732319_a_at	0.12902	0.000452	-5.39341	0.3543	-0.468811	AK290976.1		GPR1
AFFX-ThrX-M_at	0.13082	0.000461	-5.3783	0.3368	-0.480305			---	AFFX-ThrX-M_at
11730002_x_at	0.13109	0.000464	5.37232	0.3298	0.31779	NM_004558.3		NRTN
11745837_x_at	0.13133	0.000469	-5.36543	0.3218	-0.601063	AK300458.1		FN1
11752982_x_at	0.13133	0.000473	5.3587	0.3139	0.715245	EF122496.1		CA9
11746602_a_at	0.13133	0.000473	5.35783	0.3129	0.291791	AK293291.1		GGA3
11751770_a_at	0.13139	0.000476	-5.3532	0.3075	-0.33512	AK296874.1		FER
11720008_a_at	0.13146	0.000479	-5.34853	0.3021	-0.37086	AF423422.1		STEAP4
11734549_s_at	0.1323	0.000485	-5.33942	0.2914	-0.341526	NM_000358.2		TGFBI
11728177_a_at	0.13282	0.000495	-5.32369	0.273	-0.3706	NM_130810.2		DYX1C1
11716018_s_at	0.13282	0.000495	-5.32342	0.2727	-0.441561	NM_006868.3		RAB31
11757815_s_at	0.13282	0.000497	-5.32115	0.27	-0.325491	AI073393		METTL7A
11731183_a_at	0.13282	0.000502	-5.31209	0.2594	-0.296707	NM_001032281.2		TFPI
11762654_at	0.13282	0.000503	5.31066	0.2577	0.322214	U03634.1		---
11730661_a_at	0.13282	0.000503	5.31065	0.2577	0.416307	NM_001031737.2		CCDC78
AFFX-r2-Bs-phe-5_at	0.13282	0.000507	-5.30453	0.2505	-0.341996			---	AFFX-r2-Bs-phe-5_at
11739263_x_at	0.13282	0.000508	-5.30336	0.2491	-0.455204	BC039574.1		VPS4B
11737774_a_at	0.13351	0.000516	5.29134	0.235	0.318074	NM_152737.2		RNF182
11733091_a_at	0.13351	0.000518	-5.28938	0.2326	-0.410561	NM_004616.2		TSPAN8
11754710_s_at	0.13351	0.00052	-5.28546	0.228	-0.317208	Y09538.1		ZNF185
11721248_s_at	0.13351	0.000522	5.28346	0.2257	0.348801	NM_053064.3		GNG2
11760112_at	0.13683	0.000538	5.2594	0.1972	0.34006	AK300301.1		HCLS1
11738027_x_at	0.13683	0.000542	-5.25387	0.1907	-0.292505	BC127103.1		DMD
11762514_at	0.13683	0.000543	5.25311	0.1898	0.342607	AB126942.1		---
11716759_a_at	0.13695	0.000546	-5.2486	0.1844	-0.344357	NM_001225.3		CASP4
11727221_at	0.14064	0.000564	5.22464	0.156	0.743711	NM_022166.3		XYLT1
11732713_at	0.14105	0.000569	5.21742	0.1474	0.397757	NM_006350.2		FST
11760579_x_at	0.14105	0.000571	-5.21481	0.1443	-0.314985	AK289944.1		LETM2
11721115_at	0.14151	0.000578	-5.20569	0.1334	-0.335303	BC047290.1		SPCS3
11727554_s_at	0.14151	0.000579	-5.20487	0.1324	-0.719126	BC093027.1		PKIB
11745765_x_at	0.14393	0.000592	-5.18836	0.1127	-0.526562	AK300038.1		TCF4
11740143_s_at	0.14435	0.000597	-5.18187	0.1049	-0.54549	AK315926.1		BEND6
11739356_a_at	0.14435	0.000599	5.17835	0.1007	0.35334	NM_182918.3		ERG
11759017_at	0.14435	0.000603	5.174	0.0955	0.341168	BC035878.1		SLC2A5
11762256_at	0.14435	0.000605	5.17148	0.0925	0.277981	AK302155.1		AKR1E2
11730556_s_at	0.14498	0.000611	-5.16456	0.0842	-0.464525	NM_001003819.2		TRIM34 /// TRIM6-TRIM34
11748031_a_at	0.14659	0.000622	5.15015	0.0669	0.350959	AK298085.1		ALPL
11757340_s_at	0.14659	0.000626	-5.14614	0.0621	-0.282842	BM677515		RHOQ
11737956_s_at	0.14659	0.000632	-5.13826	0.0526	-0.369719	NM_144597.1		C15orf40
11758370_s_at	0.14659	0.000635	-5.13538	0.0491	-0.350652	CD365380		ETS2
11723805_a_at	0.14659	0.000638	-5.132	0.045	-0.432677	NM_005100.3		AKAP12
11722991_a_at	0.14659	0.000639	-5.13065	0.0434	-0.345745	NM_004021.1		DMD
11754144_a_at	0.14659	0.000639	-5.13059	0.0433	-0.351743	EU826577.1		MET
11747022_a_at	0.14659	0.000645	5.12385	0.0352	0.367677	BC101496.1		ATP13A4
11744258_a_at	0.14659	0.000649	5.11878	0.0291	0.289221	BI091773		ATP1B3
11734814_a_at	0.14659	0.000651	-5.11635	0.0262	-0.383619	BC022480.1		PDE1A
11718811_s_at	0.14659	0.000652	5.11487	0.0244	0.294724	NM_006255.3		PRKCH
11722663_a_at	0.14659	0.000656	-5.11069	0.0193	-0.37076	M82919.1		GABRB3
11747594_x_at	0.14659	0.000658	-5.10857	0.0167	-0.336678	AK315897.1		SH3BGRL
11736962_a_at	0.14659	0.000659	-5.10752	0.0155	-0.285631	BC104040.1		MBNL2
11743617_at	0.15028	0.000678	-5.08561	-0.0111	-0.306943	BM979113		ITGA2
11718681_a_at	0.15093	0.000684	-5.07907	-0.019	-0.294554	NM_001007157.1		PHF14
11748549_a_at	0.1516	0.000691	-5.0725	-0.027	-0.31483	AK299089.1		ZDHHC17
11764143_at	0.15303	0.0007	-5.06222	-0.0395	-0.38782	AA469958		LOC105371964
11725327_a_at	0.15507	0.000725	-5.03656	-0.0708	-0.323951	CD172116		CAMK2D
11724346_a_at	0.15507	0.000725	-5.0365	-0.0709	-0.408196	NM_022168.2		IFIH1
11759310_at	0.15507	0.000729	-5.03188	-0.0765	-0.411364	AB075826.1		FAM171B
11736132_s_at	0.15507	0.000732	-5.02897	-0.0801	-0.364704	AA722799		DCBLD2
11763365_x_at	0.15507	0.000738	-5.02363	-0.0866	-0.344676	BF338389		CARD8
11723751_at	0.15507	0.000738	-5.02345	-0.0869	-0.423045	NM_005423.4		TFF2
11743000_at	0.15507	0.000743	5.01798	-0.0936	0.361218	AK290426.1		CD83
11753611_a_at	0.15507	0.000743	5.01797	-0.0936	0.340216	AY438268.1		DFFB
11743499_a_at	0.15507	0.000745	-5.01584	-0.0962	-0.340667	DR005787		PSMG4
11760201_at	0.15507	0.000745	5.01578	-0.0963	0.281557	AK299043.1		MAN1B1
11735588_at	0.15507	0.000747	-5.01447	-0.0979	-0.332925	NM_004473.3		FOXE1
11715794_x_at	0.15507	0.000747	-5.01406	-0.0984	-0.466154	NM_001615.3		ACTG2
11728456_s_at	0.15709	0.000765	-4.99665	-0.1197	-0.424934	NM_031296.1		RAB33B
11721651_at	0.15709	0.000767	-4.99451	-0.1224	-0.330746	NM_001795.3		CDH5
11757644_a_at	0.15709	0.000768	4.99379	-0.1233	0.303781	CA417836		PASD1
11718869_x_at	0.15709	0.000773	-4.98902	-0.1291	-0.292158	CF552454		PALMD
11752027_a_at	0.15709	0.000777	4.98494	-0.1342	0.373677	BC129824.1		DLEC1
11733313_s_at	0.15709	0.000778	-4.98406	-0.1352	-0.464325	BC036674.2		PCDHA1 /// PCDHA10 /// PCDHA11 /// PCDHA12 /// PCDHA13 /// PCDHA2 /// PCDHA3 /// PCDHA4 /// PCDHA5 /// PCDHA6 /// PCDHA7 /// PCDHA8 /// PCDHA9 /// PCDHAC1 /// PCDHAC2
11752088_a_at	0.15709	0.000779	-4.98309	-0.1364	-0.311062	AK304136.1		MYO5C
11758509_s_at	0.15741	0.000784	-4.97859	-0.142	-0.607564	AI768864		ENPEP
11725353_at	0.15835	0.000792	4.97125	-0.151	0.360503	NM_014805.3		EPM2AIP1
11715670_a_at	0.16033	0.000811	-4.9537	-0.1727	-0.307156	NM_003641.3		IFITM1
11748371_a_at	0.16033	0.000812	-4.95266	-0.174	-0.316082	AF183412.1		CYP20A1
11747314_a_at	0.16033	0.000812	-4.95246	-0.1742	-0.388469	AK302651.1		PDP1
11733470_at	0.16033	0.000815	4.95029	-0.1769	0.307476	NM_174892.2		CD300LB
11733434_a_at	0.16035	0.000822	-4.9435	-0.1853	-0.378709	NM_001099855.1		MCF2
11730465_at	0.16035	0.000824	4.94198	-0.1872	0.298992	NM_000891.2		KCNJ2
11756816_a_at	0.16035	0.000831	4.93601	-0.1946	0.324437	AK307932.1		EPS8L3
11731195_at	0.16035	0.000833	-4.93395	-0.1972	-0.538467	NM_152754.2		SEMA3D
11754272_x_at	0.16035	0.000834	-4.93306	-0.1983	-0.289867	AW451120		SNRPN /// SNURF
11741700_s_at	0.16035	0.000835	-4.93195	-0.1997	-0.405958	NM_021058.3		HIST1H2BJ
11752488_a_at	0.16035	0.000841	-4.9268	-0.206	-0.360505	AK304000.1		CDH19
11737042_s_at	0.16035	0.000846	-4.92234	-0.2116	-0.389548	BC142678.1		PHLDB2
11727485_at	0.16035	0.00085	-4.9189	-0.2159	-0.289611	CB851636		TPR
11715671_x_at	0.16035	0.000853	-4.91688	-0.2184	-0.299433	NM_003641.3		IFITM1
11725190_a_at	0.16035	0.000858	-4.91233	-0.224	-0.283084	NM_020455.5		ADGRG6
11751612_a_at	0.16035	0.000859	-4.91132	-0.2253	-0.405921	AK297662.1		SOCS2
11728108_a_at	0.16035	0.000862	4.9089	-0.2283	0.376029	NM_016362.3		GHRL
11759915_at	0.16035	0.000864	-4.90724	-0.2304	-0.384845	AB029488.1		C11orf21
11719661_a_at	0.16035	0.000867	-4.9045	-0.2338	-0.367938	CR457315.1		FAM188A
11749782_x_at	0.16035	0.000878	-4.89554	-0.2449	-0.279214	AK294879.1		BCAT1
11752009_a_at	0.16035	0.000879	4.89429	-0.2465	0.383182	AK304015.1		TNC
11733213_x_at	0.16035	0.000882	-4.89236	-0.2489	-0.425338	NM_144975.3		SLFN5
11741656_a_at	0.16035	0.000891	4.88444	-0.2588	0.36872	NM_001145946.1		SLCO1C1
AFFX-r2-Bs-thr-3_s_at	0.16035	0.000896	-4.88104	-0.263	-0.370234			---	AFFX-r2-Bs-thr-3_s_at
11738966_at	0.16035	0.000898	4.87911	-0.2655	0.336732	NM_001128598.1		KRTAP25-1
11717416_a_at	0.16035	0.000901	-4.87686	-0.2683	-0.307844	AB051826.1		RHOU
11720508_at	0.16035	0.000901	-4.87685	-0.2683	-0.493484	X62008.1		FBN1
11716895_s_at	0.16035	0.000902	-4.87567	-0.2697	-0.358651	NM_005101.3		ISG15
11722910_s_at	0.16035	0.000903	4.87501	-0.2706	0.470529	NM_024514.4		CYP2R1
11757793_s_at	0.16035	0.000906	-4.87297	-0.2731	-0.304595	BE672039		TFPI
11761701_at	0.16035	0.000906	4.8723	-0.274	0.373395	AK298037.1		AP4B1
11737779_a_at	0.16035	0.000911	-4.86858	-0.2786	-0.302124	BC143899.1		KITLG
11729422_a_at	0.16035	0.000911	-4.86824	-0.279	-0.3149	BC022323.2		POPDC3
11734874_x_at	0.16035	0.000914	-4.86598	-0.2819	-0.308221	NM_003622.2		PPFIBP1
11763667_a_at	0.16035	0.000915	-4.86508	-0.283	-0.361966	AK021888.1		FER
11722992_a_at	0.16168	0.000931	-4.85318	-0.2979	-0.315507	BC150141.1		DMD
11761131_at	0.16168	0.000934	4.85021	-0.3016	0.309135	AK316443.1		NOL12
11758441_s_at	0.16168	0.000939	-4.84685	-0.3059	-0.298942	AU150838		HOXA1
11721874_at	0.16168	0.000945	-4.84222	-0.3117	-0.353153	BC032839.2		IFIT2
11750921_a_at	0.16168	0.000945	-4.84209	-0.3118	-0.318269	AK302562.1		LCLAT1
11763046_at	0.16168	0.000947	4.84081	-0.3134	0.318214	AY032661.1		---
11741805_a_at	0.16168	0.00095	4.83847	-0.3164	0.285898	AB045116.1		WNT2B
11724021_at	0.16168	0.000953	-4.83625	-0.3192	-0.405489	NM_138720.1		HIST1H2BD
11735174_a_at	0.16168	0.000954	4.835	-0.3207	0.315018	NM_001012634.1		IL32
11715994_x_at	0.16168	0.000956	-4.83376	-0.3223	-0.441622	NM_002166.4		ID2
11737040_s_at	0.16272	0.000965	-4.82665	-0.3313	-0.320778	NM_001134439.1		PHLDB2
11751941_a_at	0.16348	0.000975	-4.81958	-0.3402	-0.417555	AF042498.1		CNGB1
11718961_a_at	0.16348	0.000976	-4.81834	-0.3417	-0.32202	AK293075.1		NUFIP2
11754044_at	0.16411	0.000983	-4.81313	-0.3483	-0.265938	AY605064.1		CLSPN
11736158_x_at	0.16424	0.000989	-4.80937	-0.353	-0.335786	NM_023075.4		MPPE1
11759613_a_at	0.16424	0.000991	-4.80727	-0.3557	-0.286787	AF245045.1		GPALPP1
11722888_s_at	0.16424	0.000994	-4.80525	-0.3582	-0.321731	NM_198449.2		EMB /// EMBP1
11731080_at	0.16492	0.001	4.79777	-0.3677	0.297442	NM_032554.3		HCAR1
11716696_s_at	0.16492	0.00101	-4.79158	-0.3755	-0.399781	BC012389.1		TSPAN6
11753498_at	0.16492	0.00101	4.79042	-0.377	0.317608	AY358224.1		SLED1
11762023_at	0.16492	0.00102	4.78855	-0.3793	0.307889	BC015186.1		PDGFRA
11760244_a_at	0.16492	0.00102	-4.78818	-0.3798	-0.521496	BQ184803		CARD8
11723320_at	0.16492	0.00102	4.78791	-0.3802	0.31979	NM_015722.3		CALY
11761763_a_at	0.16638	0.00103	4.77918	-0.3912	0.327378	AK296894.1		CD9
11748773_a_at	0.16751	0.00104	-4.77076	-0.4019	-0.42872	BC023504.2		CTSV
11743829_a_at	0.16751	0.00105	-4.76876	-0.4044	-0.307641	BU073364		PAM
11760656_at	0.16751	0.00105	4.76489	-0.4093	0.285749	AY453794.1		NCKIPSD
11763901_s_at	0.16751	0.00106	-4.76197	-0.413	-0.455058	DA570606		EIF4A2
11761010_a_at	0.16751	0.00106	4.75961	-0.416	0.384067	BI754301		CKMT1A /// CKMT1B
11719208_s_at	0.16751	0.00106	-4.75772	-0.4184	-0.312093	AK297184.1		NPTN
11727239_a_at	0.16751	0.00106	-4.75736	-0.4189	-0.318432	BC037906.1		C4orf19
11744685_a_at	0.16751	0.00107	4.75448	-0.4226	0.305797	AK127448.1		B4GALNT1
11731770_a_at	0.16751	0.00107	-4.75344	-0.4239	-0.311099	NM_013352.2		DSE
11732144_a_at	0.16884	0.00108	-4.74325	-0.4369	-0.367576	AF342736.1		BBS2
11719458_at	0.16884	0.00109	-4.74139	-0.4392	-0.310313	DB373545		EXOC5
11733394_at	0.16884	0.00109	-4.74096	-0.4398	-0.379769	NM_017662.4		TRPM6
11729549_s_at	0.16934	0.00109	-4.73575	-0.4464	-0.305967	AF216967.1		ADGRG6
11753088_a_at	0.16934	0.0011	-4.73235	-0.4507	-0.453067	AK297325.1		MCTP1
11731691_at	0.16934	0.0011	-4.73206	-0.4511	-0.286389	NM_152517.2		TTC30B
11715809_a_at	0.16973	0.00111	4.72584	-0.459	0.358465	BM980763		PYGB
11723891_a_at	0.16973	0.00111	-4.72431	-0.461	-0.298137	NM_012298.1		CAND2
11751619_a_at	0.16973	0.00111	-4.72376	-0.4617	-0.378994	AK296099.1		APOL1
11716464_at	0.16976	0.00112	-4.71827	-0.4687	-0.321457	NM_170601.3		SIAE
11721580_a_at	0.16976	0.00112	-4.71744	-0.4698	-0.383794	CA418673		DIO2
11723641_a_at	0.16976	0.00112	-4.71703	-0.4703	-0.367166	NM_000147.3		FUCA1
11725390_a_at	0.17018	0.00113	4.711	-0.478	0.298379	AK292704.1		CD6
11758872_at	0.17018	0.00113	4.71089	-0.4781	0.294804	BG678787		CDC37L1
11722980_a_at	0.1708	0.00114	-4.70547	-0.4851	-0.294918	NM_019863.2		F8
11721173_a_at	0.1708	0.00114	-4.70395	-0.487	-0.313248	NM_001009921.2		VPS8
11757467_x_at	0.17155	0.00116	-4.6974	-0.4954	-0.348771	AI554315		TSPAN6
11756741_x_at	0.17155	0.00117	-4.69128	-0.5033	-0.256458	BU941966		SH3BGRL
11756454_a_at	0.17155	0.00117	4.6911	-0.5035	0.286294	BX647763.1		EXOC7
11734444_at	0.17155	0.00117	4.68663	-0.5092	0.302311	NM_001025357.2		AARD
11763522_a_at	0.17155	0.00117	-4.68659	-0.5093	-0.354606	AK294792.1		RYR2
11753743_x_at	0.17155	0.00117	-4.68645	-0.5095	-0.294349	CR533489.1		PAIP2
11760636_at	0.17155	0.00118	4.68162	-0.5157	0.344699	AK302916.1		NAGPA
11742419_at	0.17155	0.00118	-4.6815	-0.5158	-0.314749	NM_182493.2		MYLK3
11743025_at	0.17155	0.00119	-4.67823	-0.52	-0.305664	CR605420.1		ATP7A
11739719_x_at	0.17155	0.00119	-4.67771	-0.5207	-0.293246	AK094761.1		ZFP1
11720717_a_at	0.17155	0.00119	-4.67746	-0.521	-0.33925	NM_004114.3		FGF13
11747926_s_at	0.17422	0.00121	-4.66248	-0.5403	-0.288131	AK296228.1		IFI16
11740326_x_at	0.17422	0.00121	-4.66232	-0.5405	-0.384312	AK225812.1		SORBS2
11739938_at	0.17567	0.00123	4.65432	-0.5508	0.30338	NM_016529.4		ATP8A2
11724233_a_at	0.17581	0.00124	4.64772	-0.5593	0.336958	AA599487		HGSNAT
11752664_a_at	0.17581	0.00125	4.64081	-0.5682	0.308515	AF331841.1		S1PR5
AFFX-ThrX-5_at	0.17581	0.00125	-4.6407	-0.5683	-0.43824			---	AFFX-ThrX-5_at
11732165_x_at	0.17581	0.00125	4.64009	-0.5691	0.317628	NM_022773.2		LMF1
11747802_a_at	0.17581	0.00125	-4.63916	-0.5703	-0.349735	AK316222.1		SRBD1
11721744_a_at	0.17581	0.00126	4.63677	-0.5734	0.444529	NM_007361.3		NID2
11730426_a_at	0.17581	0.00126	4.63635	-0.574	0.327209	NM_181710.3		ZNRF4
11725778_a_at	0.17581	0.00126	4.63496	-0.5758	0.276401	NM_012231.4		PRDM2
11727219_a_at	0.17581	0.00127	-4.63094	-0.581	-0.306032	NM_001080976.1		DSE
11761729_x_at	0.17581	0.00127	4.62981	-0.5824	0.398955	AK295840.1		ZNF765
11751978_a_at	0.17581	0.00127	4.62804	-0.5847	0.320635	BC040020.2		ZNF280B
11729118_a_at	0.17581	0.00128	-4.62669	-0.5865	-0.26395	U22398.1		CDKN1C
11735240_a_at	0.17581	0.00128	-4.62467	-0.5891	-0.553459	BC012290.1		ACYP2
11721994_s_at	0.17581	0.00128	-4.6221	-0.5924	-0.298899	NM_198183.1		UBE2L6
11748827_a_at	0.17581	0.00129	4.62012	-0.595	0.255037	AK298859.1		LMBR1L
11748886_a_at	0.17581	0.00129	-4.61848	-0.5971	-0.312573	AF100751.1		FKBP7
11736524_at	0.17581	0.00129	4.61834	-0.5973	0.274292	BC112018.1		DCSTAMP
11748821_a_at	0.17581	0.00129	-4.61638	-0.5998	-0.435724	AK295742.1		SORBS2
11756954_s_at	0.17581	0.0013	-4.61106	-0.6067	-0.543908	BC037975.1		ZEB2
11755654_a_at	0.17581	0.0013	-4.61068	-0.6072	-0.393346	AK122849.1		PPP2R2C
11757671_a_at	0.17581	0.00131	-4.61003	-0.608	-0.350937	BE677948		FAM200B
11729550_a_at	0.17581	0.00131	-4.60571	-0.6136	-0.269065	NM_001032395.2		ADGRG6
11724442_a_at	0.17581	0.00132	4.60434	-0.6154	0.282128	BC101811.1		PTGIS
11761416_x_at	0.17581	0.00132	4.60167	-0.6189	0.303727	AK300273.1		CTHRC1
11739882_a_at	0.17581	0.00133	4.59893	-0.6224	0.589498	BQ019013		GLIS3
11725001_at	0.17581	0.00133	-4.59625	-0.6259	-0.3825	NM_024336.2		IRX3
11727058_at	0.17581	0.00133	-4.59614	-0.6261	-0.321984	NM_033281.5		MRPS36
11739325_a_at	0.17581	0.00133	-4.59577	-0.6265	-0.252026	AK292570.1		PTPN2
11741878_a_at	0.17581	0.00133	-4.59567	-0.6267	-0.291879	AF230411.1		PML
11755374_a_at	0.17581	0.00134	-4.59004	-0.634	-0.331322	BG212154		HERC5
11733143_a_at	0.17581	0.00135	-4.5886	-0.6359	-0.352459	AK300750.1		IMPA1
11758680_s_at	0.17581	0.00135	-4.58769	-0.637	-0.250196	R85693		UCHL1
11753380_a_at	0.17581	0.00135	-4.58729	-0.6376	-0.481238	AK296111.1		C3orf67
11736246_a_at	0.17581	0.00135	-4.58708	-0.6378	-0.342701	BQ000019		AMIGO2
11762994_at	0.176	0.00136	4.58326	-0.6428	0.335136	AY475220.1		YME1L1
11743846_s_at	0.176	0.00136	-4.5826	-0.6437	-0.379494	BU730835		CFH /// CFHR1
11750720_s_at	0.17698	0.00137	-4.57433	-0.6544	-0.28992	AK294938.1		GK
11732862_a_at	0.17698	0.00139	-4.56717	-0.6637	-0.312096	NM_001143959.1		C2orf74
11741200_a_at	0.17698	0.00139	4.56504	-0.6665	0.292513	AK300427.1		AKAP2 /// PALM2-AKAP2
11763718_x_at	0.17698	0.00139	-4.56481	-0.6668	-0.247064	CR605750.1		CDKN1C
11715493_a_at	0.17698	0.00139	4.56423	-0.6676	0.411827	BC016952.1		CYR61
11744969_a_at	0.17698	0.00139	-4.56389	-0.668	-0.290748	BC042057.1		PAPLN
11764180_at	0.17698	0.0014	4.56262	-0.6697	0.323599	BX102938		---
11762125_x_at	0.17698	0.0014	-4.56245	-0.6699	-0.291955	AK294686.1		KIAA0895
11758346_s_at	0.17698	0.0014	-4.56223	-0.6702	-0.285734	AV702684		PAPSS2
11763586_s_at	0.17732	0.00141	-4.55659	-0.6776	-0.456152	AK128731.1		ATF2
11727168_a_at	0.17732	0.00141	-4.5557	-0.6787	-0.350491	AK290165.1		STRIP2
11756635_a_at	0.17732	0.00141	-4.55339	-0.6817	-0.431209	AK307837.1		PLCB4
11727146_at	0.17732	0.00142	-4.55254	-0.6829	-0.314583	BC000181.2		GPR160
11721945_a_at	0.17732	0.00142	4.55191	-0.6837	0.315075	CK725013		MRVI1
11763611_a_at	0.17758	0.00142	4.54908	-0.6874	0.326711	DQ004396.1		GLI2
11741243_a_at	0.17779	0.00143	4.5463	-0.691	0.28009	AK297390.1		NGEF
11749851_a_at	0.17779	0.00144	-4.54247	-0.696	-0.295636	AK299798.1		HSDL1
11751182_a_at	0.17779	0.00144	-4.53882	-0.7008	-0.278865	M19301.1		DBT
11755891_a_at	0.17779	0.00144	4.5388	-0.7008	0.280298	AK123938.1		ERVFRD-1
11725189_x_at	0.17779	0.00146	-4.53369	-0.7075	-0.463646	BX640971.1		ADGRG6
11755151_a_at	0.17779	0.00146	-4.5335	-0.7077	-0.386897	AB000814.1		ARNTL
11759355_x_at	0.17779	0.00146	4.53304	-0.7084	0.259442	BC095544.1		GPR32
11722688_a_at	0.17779	0.00146	-4.53277	-0.7087	-0.25143	AK290059.1		LIFR
11763402_at	0.17779	0.00146	4.53243	-0.7092	0.379347	AK090854.1		LINC01069
11742300_a_at	0.18004	0.00148	-4.52098	-0.7242	-0.30376	AB037702.1		GEMIN2
11727591_s_at	0.18004	0.00149	-4.51769	-0.7285	-0.377783	NM_022353.2		OSGEPL1
11751643_x_at	0.18004	0.00149	4.51562	-0.7312	0.296636	AK298101.1		EGR1
11739563_a_at	0.18004	0.00149	-4.51506	-0.7319	-0.261085	L38019.2		ITPR1
11731505_a_at	0.18004	0.00149	-4.51497	-0.732	-0.306515	NM_173793.3		C22orf39
11722242_at	0.1814	0.00151	-4.50696	-0.7426	-0.421858	NM_012338.3		TSPAN12
11738577_at	0.1814	0.00151	4.5063	-0.7434	0.376487	BC137181.1		OR2B11
11739986_x_at	0.18153	0.00152	-4.50281	-0.748	-0.271214	AK292988.1		AMACR /// C1QTNF3-AMACR
11739842_at	0.18153	0.00152	4.5024	-0.7486	0.32915	AB234096.1		TAF4B
11717353_at	0.18176	0.00153	-4.49984	-0.7519	-0.30378	AY157301.1		EAPP
11749983_a_at	0.18249	0.00154	-4.49292	-0.761	-0.454611	AK301667.1		SERPINB5
11743043_a_at	0.18249	0.00154	4.4928	-0.7612	0.285688	AF093118.1		FBLN5
11756685_a_at	0.18249	0.00154	-4.492	-0.7623	-0.341156	AK307286.1		SEC23IP
11737955_a_at	0.18533	0.00157	-4.47836	-0.7802	-0.29422	NM_144597.1		C15orf40
11722662_a_at	0.18533	0.00158	-4.47684	-0.7822	-0.297672	NM_006665.3		HPSE
11727553_a_at	0.18533	0.00158	-4.47618	-0.7831	-0.320188	BC093027.1		PKIB
11759905_a_at	0.18555	0.00159	4.47049	-0.7906	0.258929	BC110879.1		EXD3
11751887_a_at	0.18555	0.0016	-4.46748	-0.7946	-0.340337	D21337.1		COL4A6
11741441_a_at	0.18555	0.0016	-4.46713	-0.795	-0.360046	AK303685.1		FGF13
AFFX-ThrX-3_at	0.18555	0.00161	-4.4638	-0.7994	-0.391136			---	AFFX-ThrX-3_at
11753010_x_at	0.18555	0.00161	4.46112	-0.803	0.316552	AK301642.1		FHL1
11750519_at	0.18555	0.00163	4.45626	-0.8094	0.333635	AF193043.2		ASMTL-AS1
11742830_a_at	0.18555	0.00163	-4.45617	-0.8095	-0.258721	BC113650.1		PHF3
11754330_a_at	0.18555	0.00163	-4.45322	-0.8134	-0.254014	AL576336		IRF2
11740129_a_at	0.18555	0.00164	4.44972	-0.8181	0.340992	BF110379		CACNA1B
11748131_a_at	0.18555	0.00164	-4.44954	-0.8183	-0.294312	AY037304.1		LGALS8
11721579_a_at	0.18555	0.00164	-4.44861	-0.8195	-0.362077	NM_000793.4		DIO2
11760853_a_at	0.18555	0.00165	-4.44725	-0.8213	-0.401787	BC022434.1		LOC105376033 /// ZCCHC7
11749013_x_at	0.18555	0.00165	-4.44677	-0.822	-0.291726	BC015030.1		ZBED1
11748985_x_at	0.18555	0.00165	-4.44532	-0.8239	-0.360614	AK301376.1		VTA1
11751564_a_at	0.18555	0.00165	-4.44383	-0.8259	-0.325573	AK300852.1		TSPAN6
11717795_a_at	0.18555	0.00165	4.44376	-0.826	0.320666	NM_016598.2		ZDHHC3
11719118_a_at	0.18555	0.00166	-4.4427	-0.8274	-0.36964	NM_006670.3		TPBG
11762836_a_at	0.18555	0.00166	4.4425	-0.8276	0.368366	AK300790.1		ING5
11719476_at	0.18555	0.00166	-4.44242	-0.8277	-0.252163	BC017725.1		FAM210B
11740417_a_at	0.18555	0.00166	-4.44063	-0.8301	-0.290601	U17034.1		PLA2R1
11745911_a_at	0.18555	0.00167	-4.43639	-0.8357	-0.327893	AF461266.1		RUFY2
11742596_at	0.18555	0.00167	4.43597	-0.8363	0.314052	NM_001004750.1		OR51B6
11744789_a_at	0.18555	0.00168	-4.43439	-0.8384	-0.326306	BC141854.1		CENPU
11740602_s_at	0.18555	0.00168	-4.43261	-0.8407	-0.263777	NM_001145646.1		APH1B
11736002_s_at	0.18555	0.00168	-4.43243	-0.841	-0.32635	NM_001920.3		DCN
11741047_a_at	0.18555	0.00168	4.43228	-0.8412	0.31613	NM_005428.2		VAV1
11763192_a_at	0.18555	0.00169	4.42967	-0.8446	0.398273	AY271346.1		GDPD1
11764054_a_at	0.18555	0.00169	-4.42832	-0.8464	-0.266615	DB375068		FMR1
11743129_at	0.18555	0.00169	-4.4282	-0.8466	-0.248705	BC040643.1		SORL1
11747441_a_at	0.18555	0.00169	-4.42737	-0.8477	-0.265666	AF162769.1		GLRX
11726908_a_at	0.18645	0.00171	-4.42248	-0.8542	-0.276392	NM_020373.2		ANO2
11721117_at	0.18753	0.00172	-4.41691	-0.8616	-0.256033	AY359044.1		SPCS3
11749725_a_at	0.18847	0.00173	4.41192	-0.8682	0.468961	AK297526.1		NR4A1
11736029_a_at	0.18877	0.00174	-4.40907	-0.872	-0.299966	BC136456.1		ITGA6
11722501_a_at	0.18877	0.00175	4.40632	-0.8757	0.242645	AF276893.1		PAK6
11754398_at	0.18877	0.00175	-4.40624	-0.8758	-0.316076	XM_927661.2		SMIM10
11761135_at	0.18877	0.00175	4.40439	-0.8782	0.268963	BC020656.1		SPTLC3
11748758_a_at	0.18877	0.00176	-4.40177	-0.8817	-0.404271	AK302137.1		SLC2A5
11724302_a_at	0.18877	0.00176	-4.4017	-0.8818	-0.31708	AI916242		EEA1
11760357_at	0.18939	0.00177	4.39691	-0.8882	0.263935	AK296885.1		CSAD
11735639_x_at	0.18939	0.00177	4.39641	-0.8889	0.300973	NM_001004325.1		KRTAP5-2
11720332_a_at	0.18985	0.00178	4.39248	-0.8941	0.245407	AK293162.1		SLC5A6
11722696_a_at	0.18985	0.00179	4.39043	-0.8969	0.320097	NM_001007467.1		SFI1
11720197_a_at	0.18985	0.00179	-4.38951	-0.8981	-0.340847	NM_032174.4		TOMM40L
11726010_at	0.18985	0.0018	-4.38687	-0.9016	-0.395906	NM_032783.3		CBR4
11720204_at	0.18985	0.0018	-4.38484	-0.9043	-0.259457	NM_152729.2		NT5DC1
11719839_a_at	0.18985	0.00181	-4.38303	-0.9067	-0.243576	U13738.1		CASP3
11756291_a_at	0.18985	0.00181	-4.38288	-0.9069	-0.319697	CR621235.1		CCDC53
11755550_a_at	0.18985	0.00181	4.38208	-0.908	0.336867	AK097382.1		POU2F3
11763163_at	0.18985	0.00181	4.38138	-0.9089	0.359574	BI489049		DNAJC9
11753899_a_at	0.19182	0.00184	-4.37182	-0.9217	-0.282608	AF490255.1		DLEU1
11735434_a_at	0.19182	0.00184	4.3702	-0.9239	0.397636	NM_020752.2		GPR158
11725386_a_at	0.19182	0.00184	-4.36881	-0.9257	-0.409544	BC015502.1		HOMER1
11724068_at	0.19182	0.00185	-4.36778	-0.9271	-0.272906	NM_021255.2		PELI2
11751235_a_at	0.19182	0.00185	4.36593	-0.9296	0.246784	AK297978.1		NR1H2
11727334_at	0.19182	0.00185	-4.36547	-0.9302	-0.262056	NM_031313.2		ALPPL2
11733265_a_at	0.19188	0.00186	4.36245	-0.9342	0.29457	NM_001101387.1		PIRT
11745010_a_at	0.19188	0.00187	-4.35947	-0.9382	-0.267707	BC029658.1		DCBLD2
11745549_a_at	0.19188	0.00187	4.35816	-0.94	0.238021	AF486838.1		ARHGEF2
11744138_at	0.19188	0.00187	4.3577	-0.9406	0.336769	AW005054		CAMK1D
11736058_s_at	0.19188	0.00187	-4.35747	-0.9409	-0.413933	NM_001136200.1		BORCS7
11736831_a_at	0.19188	0.00188	-4.35571	-0.9433	-0.303876	NM_032986.3		SEC23B
11725198_at	0.19188	0.00188	-4.35464	-0.9447	-0.341538	NM_000575.3		IL1A
11748865_a_at	0.19188	0.00189	-4.35211	-0.9481	-0.321541	AY358781.1		TMEM139
11742183_at	0.19188	0.00189	4.35042	-0.9504	0.264158	NM_001080413.1		NOBOX
11759070_s_at	0.19188	0.0019	4.34846	-0.953	0.295076	NM_138347.3		ZNF551
11722849_a_at	0.19188	0.0019	-4.3479	-0.9537	-0.258996	BC025714.1		PPP3CA
11741899_s_at	0.19188	0.0019	4.34679	-0.9552	0.251037	BC148273.1		FCGR2B
11725475_at	0.19188	0.0019	-4.34671	-0.9553	-0.285237	AF116030.1		ZNF354A
11747759_a_at	0.19193	0.00191	-4.34314	-0.9601	-0.280672	AK299172.1		MOSPD1
11729068_at	0.19193	0.00192	-4.34218	-0.9614	-0.356651	NM_002472.2		MYH8
11752777_s_at	0.19193	0.00192	4.34034	-0.9639	0.351236	BC108678.1		BMP8A /// BMP8B
11724843_s_at	0.19193	0.00192	4.3398	-0.9646	0.270188	BC031590.1		CISH
11717562_x_at	0.19193	0.00192	-4.33904	-0.9656	-0.275855	BC042191.1		DTX3L
11750983_a_at	0.19193	0.00193	4.33683	-0.9686	0.413942	AK299446.1		VDR
11730051_at	0.19193	0.00194	4.33317	-0.9735	0.251946	BF447703		CA13
11745192_a_at	0.19193	0.00194	-4.33237	-0.9746	-0.254665	BC006141.1		EPB41L3
11736798_a_at	0.19193	0.00194	4.33229	-0.9747	0.295462	NM_175635.1		RUNX1T1
11762049_at	0.19193	0.00194	4.33214	-0.9749	0.268231	BC053664.1		ZFYVE28
11719692_a_at	0.19193	0.00195	-4.32904	-0.9791	-0.439738	NM_004585.3		RARRES3
11758637_x_at	0.19193	0.00195	4.32879	-0.9794	0.284422	AW242046		AMY1A /// AMY1B /// AMY1C
11716939_a_at	0.19193	0.00195	-4.32847	-0.9798	-0.309821	NM_002133.1		HMOX1
11726258_at	0.19252	0.00197	-4.32391	-0.986	-0.33619	BX503543		RNF141
11743830_a_at	0.19252	0.00197	-4.3225	-0.9879	-0.451825	BU629497		PAM
11741143_x_at	0.19252	0.00198	4.32023	-0.9909	0.256058	BC040105.1		NOX4
11733790_at	0.19252	0.00198	-4.31924	-0.9922	-0.274091	BC018084.1		HSDL1
11743016_at	0.19252	0.00199	-4.31614	-0.9964	-0.234211	BU618528		DIP2C
11762533_a_at	0.19252	0.00199	-4.31581	-0.9969	-0.343556	AB051846.1		RAP1A
11734848_s_at	0.19252	0.00199	-4.31517	-0.9977	-0.260409	CB242754		ERBB2IP
11763892_at	0.19252	0.00199	4.31469	-0.9984	0.317013	AW275953		SNORD17
11719323_at	0.19252	0.002	-4.31414	-0.9991	-0.344754	NM_000314.4		PTEN
11749522_a_at	0.19255	0.002	4.3127	-1.001	0.279436	BC052589.1		LAG3
11719662_s_at	0.1926	0.002	-4.31115	-1.0031	-0.326676	NM_024948.2		FAM188A
11724435_a_at	0.1926	0.00201	-4.30876	-1.0063	-0.320626	NM_022445.3		TPK1
11715918_s_at	0.1926	0.00201	-4.30851	-1.0067	-0.264833	NM_013230.2		CD24
11736761_at	0.19323	0.00202	-4.30445	-1.0122	-0.283617	BC117478.1		CARD16
11739650_at	0.19323	0.00203	4.30142	-1.0162	0.3041	BX327135		DLL4
11750614_x_at	0.19323	0.00204	4.29993	-1.0183	0.303102	AF015730.1		GRIN1
11750258_a_at	0.19323	0.00204	4.29904	-1.0195	0.286613	AY188338.1		ATXN2L
11715911_at	0.19323	0.00204	-4.29869	-1.0199	-0.257466	NM_004999.3		MYO6
11729198_at	0.19323	0.00204	4.29825	-1.0205	0.30573	NM_030885.3		MAP4
11736091_s_at	0.19323	0.00205	-4.2961	-1.0234	-0.255181	CB305863		GCA
11727655_s_at	0.19323	0.00205	-4.29465	-1.0254	-0.267788	NM_001723.4		DST
11757022_x_at	0.19323	0.00205	4.29441	-1.0257	0.311495	CR598467.1		TFPI2
11756306_a_at	0.19326	0.00206	-4.293	-1.0276	-0.361305	CR596753.1		PARP9
11721387_at	0.194	0.00207	-4.28851	-1.0337	-0.268408	NM_032857.2		LACTB
11724434_a_at	0.194	0.00207	-4.28776	-1.0347	-0.398959	AK289652.1		TPK1
11722664_a_at	0.19406	0.00208	-4.28625	-1.0367	-0.440598	AK095011.1		GABRB3
11763367_at	0.19504	0.00209	-4.28152	-1.0431	-0.299898	CA313460		NABP1
11749167_a_at	0.19523	0.0021	-4.27954	-1.0458	-0.246135	AK297790.1		PXYLP1
11739264_a_at	0.19599	0.00212	-4.27274	-1.055	-0.430473	AY232629.1		VPS4B
11718041_at	0.19599	0.00212	-4.2725	-1.0553	-0.247503	NM_003094.2		SNRPE
11719895_x_at	0.19599	0.00212	-4.27207	-1.0559	-0.344628	CA416310		FAM91A1
11720489_a_at	0.19599	0.00213	-4.26946	-1.0594	-0.45074	BC009978.2		ACTC1
11749726_x_at	0.19599	0.00213	4.26884	-1.0603	0.469304	AK297526.1		NR4A1
11737972_at	0.19599	0.00214	4.26683	-1.063	0.260733	AK292969.1		RAB39A
11739705_a_at	0.19599	0.00214	4.26669	-1.0632	0.350063	BC136271.1		CRB1
11737182_at	0.19599	0.00214	4.26663	-1.0633	0.311543	NM_004256.3		SLC22A13
11755609_a_at	0.19599	0.00214	4.26538	-1.065	0.304256	AL137259.1		HYDIN
11732965_a_at	0.19675	0.00215	-4.26146	-1.0703	-0.240067	M92650.1		DMD
11719026_a_at	0.19731	0.00217	-4.25721	-1.076	-0.439748	NM_015310.3		PSD3
11741695_a_at	0.19731	0.00217	-4.25699	-1.0763	-0.396962	AB037701.1		GEMIN2
11726855_at	0.19777	0.00219	-4.25173	-1.0835	-0.30524	NM_007038.3		ADAMTS5
11754735_s_at	0.19777	0.00219	-4.24915	-1.087	-0.536541	AK128516.1		ABCA13
11756650_a_at	0.19777	0.0022	-4.24826	-1.0882	-0.327342	AK307060.1		CHP1
11728929_x_at	0.19777	0.0022	4.24695	-1.09	0.236856	NM_014427.4		CPNE7
11716796_s_at	0.19777	0.00221	-4.24301	-1.0953	-0.268853	NM_005531.2		IFI16
11743498_at	0.19777	0.00221	-4.24277	-1.0956	-0.325421	M22489.1		BMP2
11734005_s_at	0.19777	0.00222	-4.2426	-1.0959	-0.57125	NM_001100389.1		TMEM192
11716693_a_at	0.19777	0.00222	-4.24251	-1.096	-0.242384	AB097016.1		TSPAN6
11734198_at	0.19777	0.00222	4.24186	-1.0969	0.278723	BC132829.1		LUZP2
11741523_x_at	0.19777	0.00222	4.24121	-1.0978	0.282675	BC131696.1		SLC35G4 /// SLC35G5
11751929_x_at	0.19777	0.00222	-4.2406	-1.0986	-0.317268	AL832379.1		MYPN
11732286_a_at	0.19777	0.00223	-4.23856	-1.1013	-0.418968	AK023138.1		DZIP3
11725721_a_at	0.19777	0.00223	4.23831	-1.1017	0.28197	NM_024864.3		MRM1
11739579_a_at	0.19777	0.00223	-4.23804	-1.1021	-0.368006	BM674715		PGBD1
11761725_a_at	0.19779	0.00223	4.23672	-1.1039	0.284716	AK301456.1		PNOC
11729099_a_at	0.1989	0.00225	4.23159	-1.1108	0.267343	NM_002182.2		IL1RAP
11741097_a_at	0.1989	0.00226	4.23024	-1.1127	0.286396	AK316452.1		WBP1L
11733808_a_at	0.1989	0.00226	-4.22794	-1.1158	-0.345736	NM_001127644.1		GABRA1
11736281_a_at	0.1989	0.00227	-4.22582	-1.1187	-0.487817	AJ001417.1		SLC22A3
11758672_s_at	0.1989	0.00227	-4.22528	-1.1194	-0.251252	AI241904		UCHL1
11756243_a_at	0.1989	0.00227	-4.2248	-1.1201	-0.358441	AL713793.1		DAPP1
11726727_a_at	0.1989	0.00228	-4.22443	-1.1206	-0.258472	CD369785		NABP1
11761579_at	0.20011	0.0023	-4.21705	-1.1306	-0.243426	EF158324.1		DMKN
11726193_at	0.20011	0.0023	4.21615	-1.1318	0.276814	NM_020814.2		2020-03-04
11746821_a_at	0.20011	0.0023	-4.21614	-1.1319	-0.547924	AK294072.1		ETNPPL
11729290_a_at	0.20011	0.00231	4.21547	-1.1328	0.30383	NM_021973.2		HAND2
11718722_at	0.20034	0.00231	-4.21263	-1.1367	-0.312707	NM_005672.3		PSCA
11737612_a_at	0.20034	0.00232	-4.2123	-1.1371	-0.265079	NM_178566.3		ZDHHC21
11753133_x_at	0.20039	0.00232	-4.21096	-1.1389	-0.396983	AK297806.1		MCM8
11737127_a_at	0.20046	0.00233	-4.2095	-1.1409	-0.393426	BC137122.1		ITGA1
11763158_x_at	0.201	0.00234	4.2065	-1.145	0.330489	Z25424.1		MKNK2
11722860_a_at	0.20119	0.00234	4.20468	-1.1475	0.266263	BG939858		TRIM2
11763325_a_at	0.2012	0.00235	-4.20345	-1.1492	-0.309223	BX107478		FER
11739534_a_at	0.20167	0.00236	-4.20069	-1.1529	-0.36266	AK316350.1		FN1
11744236_a_at	0.20193	0.00236	-4.19855	-1.1559	-0.412413	AW150758		DDX60
11735609_a_at	0.20193	0.00237	4.197	-1.158	0.233324	NM_001113382.1		FER1L5
11754087_a_at	0.20193	0.00237	-4.1963	-1.1589	-0.346742	BT007333.1		CTNND1 /// TMX2-CTNND1
11760302_a_at	0.20198	0.00238	4.19495	-1.1608	0.270804	AK301138.1		HEXA
11730536_at	0.20247	0.00239	4.19213	-1.1646	0.293822	NM_152889.1		CHST13
11751218_a_at	0.20337	0.00241	4.18587	-1.1732	0.27059	AK294652.1		CA10
AFFX-r2-Bs-thr-M_s_at	0.20337	0.00241	-4.18481	-1.1746	-0.306801			---	AFFX-r2-Bs-thr-M_s_at
11740773_s_at	0.20337	0.00241	-4.18459	-1.1749	-0.303939	NM_001115008.1		LIN54
11743157_a_at	0.20337	0.00241	-4.18397	-1.1758	-0.263496	EU093082.1		ETFDH
11743934_a_at	0.20337	0.00242	-4.18332	-1.1767	-0.259561	AI186320		C1GALT1C1
11740501_a_at	0.2045	0.00243	4.17834	-1.1835	0.294513	BC136471.1		SPECC1L
11750224_a_at	0.2045	0.00244	-4.17724	-1.185	-0.367051	AK295140.1		CCDC117
11745114_a_at	0.20576	0.00246	-4.17192	-1.1923	-0.347441	BC034949.1		ADGRE2
11758150_s_at	0.20614	0.00247	4.16786	-1.1979	0.283871	DB350404		ARSE
AFFX-r2-Bs-dap-5_at	0.20614	0.00248	-4.16562	-1.2009	-0.285764			---	AFFX-r2-Bs-dap-5_at
11715202_s_at	0.20614	0.00248	-4.16516	-1.2015	-0.226161		55749396	TCEAL1
11756608_s_at	0.20614	0.00248	4.16486	-1.202	0.281538	BU150614		STARD9
11746798_x_at	0.20614	0.00249	-4.16345	-1.2039	-0.246531	AK298939.1		SDC2
AFFX-r2-Bs-phe-M_at	0.20614	0.00249	-4.16335	-1.204	-0.30105			---	AFFX-r2-Bs-phe-M_at
11754750_a_at	0.20614	0.00249	4.16267	-1.205	0.246395	AK055471.1		NLGN4X
11729840_s_at	0.20614	0.0025	-4.16126	-1.2069	-0.32578	NM_017742.4		ZCCHC2
11727105_s_at	0.20614	0.00251	4.15753	-1.212	0.326793	BX538312.1		FGD5
11755142_s_at	0.20614	0.00251	-4.15702	-1.2127	-0.319979	AK091089.1		EOGT
11734024_x_at	0.20614	0.00251	4.1567	-1.2132	0.315526	NM_182568.3		CCDC144A /// CCDC144B /// CCDC144CP
11716419_at	0.20614	0.00252	4.15423	-1.2165	0.306772	NM_003128.2		SPTBN1
11748068_x_at	0.20614	0.00253	-4.1522	-1.2193	-0.256729	AK292795.1		CCPG1 /// DYX1C1-CCPG1
11737043_x_at	0.20614	0.00253	-4.15197	-1.2197	-0.340998	BC142678.1		PHLDB2
11748903_a_at	0.20614	0.00254	4.15047	-1.2217	0.231588	AK293360.1		PARVG
11732474_at	0.20614	0.00255	4.14806	-1.225	0.305825	NM_001631.3		ALPI
11727361_a_at	0.20614	0.00255	-4.14797	-1.2251	-0.409949	NM_053032.2		MYLK
11732326_x_at	0.20614	0.00255	-4.14783	-1.2253	-0.273773	NM_022129.3		PBLD
11755819_a_at	0.20614	0.00255	-4.14578	-1.2281	-0.333328	AK125989.1		DDX58
11740606_a_at	0.20614	0.00255	-4.14575	-1.2282	-0.336913	NM_001013619.2		HYKK
11759432_a_at	0.20614	0.00256	-4.1447	-1.2296	-0.297254	AW966069		TDRP
11755521_a_at	0.20614	0.00256	-4.14308	-1.2319	-0.226979	BC067289.1		CTSV
11726644_at	0.20614	0.00257	-4.14259	-1.2325	-0.517026	AJ001625.1		PEX3
11729320_a_at	0.20614	0.00257	-4.14153	-1.234	-0.311378	AF073958.1		SOCS5
11718450_at	0.20614	0.00257	-4.14063	-1.2352	-0.236212	NM_000262.2		NAGA
11717162_a_at	0.20614	0.00258	4.13979	-1.2364	0.227666	NM_001078177.1		SLC29A1
11725387_x_at	0.20614	0.00258	-4.13974	-1.2365	-0.370559	BC015502.1		HOMER1
11725154_a_at	0.20614	0.00258	-4.13793	-1.2389	-0.301223	NM_153046.2		TDRD9
11758468_s_at	0.20614	0.00259	4.13646	-1.241	0.391902	AA873869		TSHZ2
11723400_a_at	0.20614	0.00259	-4.13614	-1.2414	-0.336181	NM_006282.2		STK4
11739315_at	0.20614	0.00259	4.13601	-1.2416	0.289665	F09283		KDR
11747961_a_at	0.20636	0.0026	-4.13421	-1.2441	-0.26843	AK300962.1		PSMB8
11732432_a_at	0.20721	0.00261	-4.13034	-1.2494	-0.313788	NM_001128127.1		GK
11763574_at	0.2074	0.00262	4.12865	-1.2517	0.232844	BC092505.1		LINC01118
11728884_a_at	0.20792	0.00263	-4.12588	-1.2555	-0.246977	AF255922.1		TM6SF1
11752035_a_at	0.20806	0.00264	4.12434	-1.2577	0.270463	AB022318.1		NOS2
11756840_a_at	0.20873	0.00265	-4.12108	-1.2621	-0.284118	AK308134.1		ZFP1
11727192_at	0.20955	0.00267	-4.11622	-1.2688	-0.339541	NM_152331.3		ACOT4
11757448_s_at	0.20955	0.00267	-4.1149	-1.2707	-0.530581	AA866216		ADD3
11722533_x_at	0.20955	0.00268	-4.11445	-1.2713	-0.256157	BQ010124		CALD1
11727429_at	0.20955	0.00268	-4.11416	-1.2717	-0.407816	BC070260.1		SMIM8
11721557_a_at	0.21124	0.0027	-4.10768	-1.2806	-0.295736	NM_007168.2		ABCA8
11748201_a_at	0.21185	0.00273	-4.10141	-1.2893	-0.261193	AB019255.1		ZNF644
11736844_s_at	0.21185	0.00273	-4.10124	-1.2895	-0.429298	AK292484.1		CEP44
11734610_x_at	0.21185	0.00273	4.10028	-1.2908	0.295269	NM_001012503.1		KRTAP5-7
11724779_at	0.21185	0.00274	4.09911	-1.2925	0.296943	NM_173582.3		PGM2L1
11754612_a_at	0.21185	0.00274	-4.09793	-1.2941	-0.254953	CR627457.1		2020-09-11
11741002_a_at	0.21185	0.00275	4.09669	-1.2958	0.252485	BC130632.1		RNF123
11723854_at	0.21185	0.00275	-4.09481	-1.2984	-0.267802	NM_017654.2		SAMD9
11753906_x_at	0.21185	0.00276	-4.09436	-1.299	-0.274389	BC143954.1		SMARCA1
AFFX-r2-Bs-thr-5_s_at	0.21185	0.00276	-4.09244	-1.3017	-0.428384			---	AFFX-r2-Bs-thr-5_s_at
11758669_s_at	0.21185	0.00277	-4.09216	-1.3021	-0.252764	R45201		RHOQ
11741503_a_at	0.21185	0.00277	-4.09191	-1.3024	-0.35622	AK291566.1		CREM
11725790_at	0.21185	0.00277	-4.0912	-1.3034	-0.317684	NM_000110.3		DPYD
11722959_a_at	0.21185	0.00277	4.09074	-1.304	0.235346	NM_001130083.1		ABLIM2
11761308_s_at	0.21185	0.00278	4.08885	-1.3066	0.289726	AK294687.1		PIH1D1
11736044_a_at	0.21185	0.00279	-4.08721	-1.3089	-0.308563	BQ227385		MYH10
11751995_a_at	0.21185	0.00279	4.08706	-1.3091	0.395006	BC113978.1		ADGRG2
11756693_a_at	0.21185	0.00279	-4.08698	-1.3092	-0.260518	AV705361		MAGED1
11753898_x_at	0.21185	0.00279	4.08612	-1.3104	0.308754	DQ284438.1		HLA-DQA1
11718479_x_at	0.21185	0.0028	4.08501	-1.312	0.354953	AF035277.1		STAR
11729672_x_at	0.21185	0.0028	-4.08478	-1.3123	-0.271477	BU741060		FAM200B
11753845_a_at	0.21208	0.0028	4.083	-1.3147	0.28707	AB046579.1		CCL25
11717168_a_at	0.21239	0.00282	4.08013	-1.3187	0.330649	NM_002616.2		PER1
11744743_a_at	0.21239	0.00282	-4.07912	-1.3201	-0.322429	AB210042.1		TSHZ1
11757751_s_at	0.21239	0.00282	4.07895	-1.3203	0.338416	BE620457		NRP1
11727240_a_at	0.21292	0.00283	-4.07624	-1.3241	-0.41592	CB048961		C4orf19
11763862_x_at	0.21294	0.00284	-4.07338	-1.3281	-0.222437	DA982774		SH3BGRL
11756871_x_at	0.21294	0.00285	-4.07304	-1.3285	-0.274193	AK311256.1		SNX10
11720922_a_at	0.21294	0.00286	-4.07066	-1.3318	-0.244973	NM_006674.2		HCP5
11763758_at	0.21294	0.00286	4.07057	-1.332	0.277137	AK309304.1		VILL
11733130_x_at	0.21294	0.00286	-4.07028	-1.3324	-0.347083	BU742894		ZSCAN26
11760141_s_at	0.21294	0.00286	4.07007	-1.3326	0.315545	AK289614.1		RBM3
11763740_a_at	0.21329	0.00287	-4.06797	-1.3356	-0.378462	BC042997.1		ACTR6
11742640_x_at	0.21337	0.00288	-4.06478	-1.34	-0.281556	NM_001034836.1		RDM1
11738238_at	0.21337	0.00288	4.06473	-1.34	0.289371	BC106708.2		PURG
11728977_a_at	0.21337	0.00288	4.06413	-1.3409	0.322935	NM_001110199.1		SRRM3
11745802_a_at	0.21337	0.00289	-4.06295	-1.3425	-0.252862	U07231.1		GRSF1
11726299_x_at	0.21337	0.0029	-4.06089	-1.3454	-0.294755	AF342815.1		LGALS8
11740934_a_at	0.21337	0.0029	-4.05996	-1.3467	-0.246929	NM_001129897.1		NUSAP1
11720909_a_at	0.21337	0.0029	4.05981	-1.3469	0.362587	NM_138399.3		TMEM44
11718520_at	0.21337	0.0029	-4.05966	-1.3471	-0.286544	BQ006748		KCMF1
11719588_a_at	0.21383	0.00292	-4.05632	-1.3517	-0.274801	BC000562.2		OAS1
11718430_a_at	0.21383	0.00292	-4.0557	-1.3526	-0.253914	NM_006973.2		ZNF32
11718325_at	0.21383	0.00292	4.05478	-1.3539	0.304651	NM_031459.3		SESN2
11725825_a_at	0.21383	0.00293	-4.05423	-1.3546	-0.266443	NM_024009.2		GJB3
11721529_at	0.21384	0.00293	-4.05261	-1.3569	-0.28713	NM_016353.4		ZDHHC2
11730863_at	0.21384	0.00294	-4.05222	-1.3574	-0.256559	AK022544.1		CTTNBP2NL
11723401_x_at	0.21422	0.00294	-4.05006	-1.3604	-0.296121	NM_006282.2		STK4
11719194_a_at	0.21499	0.00296	-4.04596	-1.3661	-0.226874	NM_001127453.1		DFNA5
11719324_x_at	0.21499	0.00297	-4.04529	-1.367	-0.301428	NM_000314.4		PTEN
11743055_at	0.21499	0.00297	-4.0447	-1.3679	-0.250857	AW195644		PLAA
11723847_a_at	0.21501	0.00297	-4.04364	-1.3693	-0.265496	NM_173694.3		ATP11C
11753742_a_at	0.21543	0.00298	-4.0412	-1.3727	-0.307836	CR533489.1		PAIP2
11762447_at	0.21543	0.00299	4.03894	-1.3759	0.30436	BC041806.1		PIBF1
11715665_a_at	0.21543	0.003	-4.03682	-1.3788	-0.23384	NM_004159.4		PSMB8
11745411_a_at	0.21543	0.003	-4.0368	-1.3789	-0.276081	AK295551.1		TMX3
11722182_a_at	0.21543	0.00301	-4.03579	-1.3803	-0.293639	NM_001695.4		ATP6V1C1
11718309_at	0.21543	0.00301	-4.03485	-1.3816	-0.284688	NM_020733.1		HEG1
11731263_a_at	0.21543	0.00301	-4.03437	-1.3822	-0.317151	NM_014951.2		ZNF365
11757233_at	0.21543	0.00302	4.03356	-1.3834	0.277905	NR_003255.2		TSIX
11736412_s_at	0.21543	0.00302	4.03313	-1.384	0.325214	BC096359.3		NHLH2
11720569_a_at	0.21543	0.00304	4.02936	-1.3892	0.237187	NM_019850.2		NGEF
11762361_at	0.21543	0.00304	4.02829	-1.3907	0.247662	AY250185.1		WDFY3-AS2
11737645_a_at	0.21543	0.00304	4.02776	-1.3914	0.266136	BC130641.1		FAM150A
11715846_at	0.21543	0.00305	-4.02672	-1.3929	-0.382701	NM_004105.3		EFEMP1
11743024_at	0.21543	0.00305	-4.02602	-1.3939	-0.308499	AK299449.1		ATP7A
11722881_at	0.21543	0.00305	-4.02586	-1.3941	-0.256144	BC011992.1		KIAA1468
11756604_a_at	0.21543	0.00306	-4.02424	-1.3963	-0.475371	BC098138.1		PCDHB2
11720134_s_at	0.21543	0.00306	-4.02362	-1.3972	-0.232402	M15036.1		PROS1
11716016_at	0.21543	0.00307	4.02159	-1.4	0.265532	BC012367.1		MAL2
11734763_at	0.21543	0.00307	4.02145	-1.4002	0.247075	NM_005338.4		HIP1
11720740_a_at	0.21543	0.00308	4.02049	-1.4016	0.272325	NM_024979.3		MCF2L
11746088_a_at	0.21543	0.00308	-4.02042	-1.4017	-0.437921	DB350079		IFI44
11746514_a_at	0.21543	0.00308	4.01977	-1.4026	0.247592	BC144557.1		KIF21B
11745104_a_at	0.21543	0.00308	-4.01948	-1.403	-0.287618	AK294632.1		PJA1
11718849_at	0.21543	0.00309	4.0179	-1.4052	0.250216	NM_005608.2		CORO1B /// PTPRCAP
11751084_s_at	0.21543	0.00309	4.01764	-1.4055	0.229313	BC062465.1		PLXND1
11744753_a_at	0.21543	0.00309	-4.01735	-1.4059	-0.277894	AY358082.1		LRRC28
11716113_a_at	0.21566	0.0031	-4.01568	-1.4083	-0.246746	NM_213622.1		STAMBP
11762321_s_at	0.21612	0.00311	-4.01267	-1.4125	-0.288594	EU369627.1		TRAV12-2 /// YME1L1
11720068_a_at	0.21612	0.00312	-4.01185	-1.4136	-0.369635	BC020905.1		APH1B
11728954_a_at	0.21612	0.00312	-4.0108	-1.4151	-0.244545	NM_000899.3		KITLG
11754641_x_at	0.21612	0.00313	4.00896	-1.4177	0.279928	AK058094.1		SFTPC
11745746_a_at	0.21612	0.00314	-4.0079	-1.4191	-0.260871	AK303690.1		AHCYL1
11734550_x_at	0.21612	0.00315	-4.00572	-1.4222	-0.281105	NM_000358.2		TGFBI
11725191_s_at	0.21612	0.00315	-4.00528	-1.4228	-0.241821	NM_020455.5		ADGRG6
11745304_s_at	0.21612	0.00315	4.00523	-1.4229	0.296894	AF345651.1		PFN1P2
11723951_a_at	0.21612	0.00315	-4.00453	-1.4238	-0.226208	AL544620		TFPI
11755695_a_at	0.21612	0.00316	-4.00294	-1.4261	-0.293211	AK092914.1		FUCA1
11735995_a_at	0.21612	0.00317	-4.00171	-1.4278	-0.263973	NM_005151.3		USP14
11751264_a_at	0.21612	0.00317	4.00146	-1.4281	0.327742	AK299213.1		MAN2A2
11762430_a_at	0.21612	0.00317	3.99994	-1.4303	0.270505	BC112938.1		DAB1
11745801_s_at	0.21612	0.00317	-3.9998	-1.4304	-0.226563	AK295396.1		CAP1
11716639_a_at	0.21612	0.00318	-3.99959	-1.4307	-0.264884	BC047305.1		COL4A1
11721164_a_at	0.21612	0.00318	3.99939	-1.431	0.313533	AK291680.1		KHNYN
11725655_at	0.21657	0.00319	-3.99621	-1.4355	-0.244752	BC056906.1		GTF2H5
11726789_a_at	0.21657	0.00319	3.99605	-1.4357	0.286543	BC129986.1		CNTN2
11720078_a_at	0.21657	0.0032	3.99525	-1.4368	0.318915	AW770836		NTRK2
11726006_at	0.21759	0.00322	-3.99121	-1.4425	-0.233396	NM_021194.2		SLC30A1
11734858_at	0.21761	0.00322	-3.99001	-1.4441	-0.358388	AI675762		ERO1B
11739417_at	0.21761	0.00323	3.98891	-1.4457	0.403993	NM_001007561.2		IRGQ
11725471_a_at	0.21761	0.00323	-3.98842	-1.4464	-0.269904	D63998.1		MAN2A1
11753001_a_at	0.21761	0.00323	-3.98752	-1.4476	-0.277705	DQ356894.1		PPARG
11728727_at	0.21854	0.00325	3.98375	-1.4529	0.270332	NM_006890.2		CEACAM7
11745938_a_at	0.21863	0.00326	-3.98128	-1.4563	-0.267396	AK316287.1		AIM1
11721049_at	0.21863	0.00327	-3.98082	-1.457	-0.320327	NM_006072.4		CCL26
11735398_a_at	0.21863	0.00327	-3.98035	-1.4576	-0.251708	U58837.1		CNGB1
11718048_a_at	0.21863	0.00328	-3.97852	-1.4602	-0.266395	BC010965.1		GLRX
11724540_a_at	0.21863	0.00328	3.97733	-1.4619	0.234202	NM_000552.3		VWF
11737246_s_at	0.21863	0.00328	-3.97729	-1.4619	-0.234624	BC150596.1		RALGAPA1 /// RALGAPA1P
11744307_a_at	0.21863	0.00329	-3.97581	-1.464	-0.39407	AU310721		TTC39A
11759277_at	0.21863	0.0033	3.97447	-1.4659	0.31445	BC136926.1		OR2T34
11756804_a_at	0.21863	0.0033	3.97424	-1.4662	0.359727	BX640845.1		FSTL4
11747905_a_at	0.21863	0.0033	3.97384	-1.4668	0.303395	AK298542.1		NID2
11724367_a_at	0.21863	0.00331	-3.9727	-1.4684	-0.254207	NM_153618.1		SEMA6D
11737833_at	0.21863	0.00331	3.97109	-1.4706	0.261417	NM_002187.2		IL12B
11739215_a_at	0.21863	0.00332	3.97061	-1.4713	0.279486	AK294514.1		SLC25A23
11750776_a_at	0.21863	0.00332	3.97059	-1.4713	0.246844	AK303570.1		LOC102724200 /// TRAPPC10
11762388_at	0.21863	0.00333	-3.96722	-1.476	-0.334897	BX640637.1		LOC145783 /// ZNF280D
11727215_a_at	0.21863	0.00333	3.96719	-1.4761	0.295161	BC007675.2		NRG1
11719880_at	0.21863	0.00334	-3.96615	-1.4775	-0.320361	AY358795.1		OSTM1
11723863_a_at	0.21863	0.00336	-3.96281	-1.4822	-0.327557	NM_014689.2		DOCK10
11746878_s_at	0.21863	0.00336	-3.96135	-1.4843	-0.273359	M96843.1		ID2
11728257_at	0.21863	0.00337	-3.96021	-1.4859	-0.254549	NM_020165.2		RAD18
11764158_at	0.21863	0.00338	3.95878	-1.4879	0.351022	BX104244		---
11726250_at	0.21863	0.00338	3.95775	-1.4893	0.269968	BT007048.1		AGR2
11716695_a_at	0.21863	0.00338	-3.95707	-1.4903	-0.254661	BC012389.1		TSPAN6
11762460_at	0.21863	0.00339	3.95669	-1.4908	0.243533	L20860.1		SEPT5-GP1BB
11747593_a_at	0.21863	0.00339	-3.95651	-1.4911	-0.263143	AK315897.1		SH3BGRL
11715436_at	0.21863	0.00339	-3.95633	-1.4913	-0.276182	CR594958.1		TIMP3
11761768_at	0.21863	0.00339	3.95628	-1.4914	0.355968	AK294077.1		PACRGL
11741841_a_at	0.21863	0.00339	3.95574	-1.4922	0.254838	BC126413.1		C10orf71
11727528_a_at	0.21863	0.0034	-3.95467	-1.4936	-0.269712	AY279109.1		PHF20L1
11760743_x_at	0.21863	0.0034	3.95458	-1.4938	0.266928	AK304233.1		DYNC1LI2
11722879_a_at	0.21863	0.0034	-3.9534	-1.4954	-0.311722	NM_181674.2		PPP2R2B
11738026_a_at	0.21863	0.00341	-3.9526	-1.4966	-0.383683	BC127103.1		DMD
11761819_a_at	0.21863	0.00341	3.95255	-1.4966	0.266194	DQ916741.1		RDX
11738884_x_at	0.21863	0.00341	-3.9525	-1.4967	-0.247365	NM_033292.2		CASP1
11724444_a_at	0.21863	0.00342	-3.95072	-1.4992	-0.249827	NM_001031739.1		ASB9
11724477_a_at	0.21863	0.00344	3.9471	-1.5043	0.282311	NM_005438.3		FOSL1
11751096_a_at	0.21863	0.00344	-3.94621	-1.5055	-0.230491	AK296142.1		SNX10
11753472_a_at	0.21863	0.00344	-3.94583	-1.5061	-0.445423	AB037703.1		GEMIN2
11738695_a_at	0.21863	0.00345	3.94439	-1.5081	0.269016	NM_173472.1		FANCD2OS
11729207_s_at	0.21863	0.00345	-3.9435	-1.5093	-0.320025	AK289854.1		PTPN11
11760241_a_at	0.21863	0.00346	-3.94295	-1.5101	-0.243725	AK296223.1		SKP2
11741854_at	0.21863	0.00346	3.94289	-1.5102	0.258989	BC109388.1		CCDC140
11724502_at	0.21863	0.00346	3.94239	-1.5109	0.245644	BC136513.1		SPON1
11721041_a_at	0.21863	0.00346	-3.94166	-1.5119	-0.259927	NM_021942.4		TRAPPC11
11723402_a_at	0.21863	0.00347	-3.94037	-1.5138	-0.252526	BC093768.1		STK4
11728214_a_at	0.21863	0.00347	3.93976	-1.5146	0.381352	AK292822.1		NRP1
11735636_a_at	0.21863	0.00348	-3.93952	-1.5149	-0.300953	NM_001039650.2		ZMYM5
11759298_s_at	0.21863	0.00348	-3.93945	-1.515	-0.267918	AB037781.1		SCYL2
11741222_a_at	0.21863	0.00348	3.9389	-1.5158	0.323024	AY358785.1		FAM198B
11753800_x_at	0.21863	0.00348	-3.9388	-1.516	-0.248495	AY033902.1		SMIM11A /// SMIM11B
11722848_a_at	0.21863	0.00349	-3.93751	-1.5178	-0.272523	L14778.1		PPP3CA
11724256_s_at	0.21863	0.00349	-3.93719	-1.5182	-0.22692	NM_016816.2		OAS1
11721069_a_at	0.21863	0.00349	3.93713	-1.5183	0.233903	NM_152879.2		DGKD
11719532_x_at	0.21863	0.0035	3.93526	-1.5209	0.266646	NM_002429.4		MMP19
11753793_x_at	0.21863	0.0035	-3.93493	-1.5214	-0.221703	AF529370.1		KIAA0101
11732164_a_at	0.21863	0.00351	3.93392	-1.5228	0.320225	NM_022773.2		LMF1
11726726_s_at	0.21863	0.00351	-3.93256	-1.5247	-0.248741	BC017114.1		NABP1
11763250_x_at	0.21863	0.00351	3.93218	-1.5253	0.264493	BT006880.1		CXCL1 /// CXCL2
11732170_a_at	0.21863	0.00351	-3.93218	-1.5253	-0.272086	AA101066		GRSF1
11715329_at	0.21933	0.00353	-3.92921	-1.5294	-0.343283		219801896	SLC6A15
11727892_at	0.21939	0.00355	3.92615	-1.5338	0.248417	NM_002725.3		PRELP
11746993_a_at	0.21939	0.00355	3.92566	-1.5344	0.245706	AK296656.1		PRSS8
11763224_x_at	0.21939	0.00357	3.92223	-1.5393	0.23942	BT019771.1		GAP43
11720044_at	0.21939	0.00357	-3.92171	-1.54	-0.255527	NM_003930.3		SKAP2
11752291_x_at	0.21939	0.00357	-3.92165	-1.5401	-0.348348	BC066903.1		SLC30A6
11762412_at	0.21939	0.00358	3.92037	-1.5419	0.247709	U25433.1		---
11725039_at	0.21939	0.00358	-3.92037	-1.5419	-0.245311	AB451321.1		FGF2
11726439_a_at	0.21939	0.00358	-3.92015	-1.5422	-0.289534	NM_006785.2		MALT1
11728887_x_at	0.21939	0.00359	-3.91867	-1.5443	-0.266313	AF027150.1		GEMIN2
11717995_x_at	0.21939	0.00359	3.91835	-1.5448	0.408932	NM_002135.3		NR4A1
11728162_at	0.21939	0.00359	3.91804	-1.5452	0.25756	NM_198427.1		BCAN
11723145_a_at	0.21939	0.0036	-3.91674	-1.547	-0.277237	AF222747.1		RANBP17
11744274_at	0.21939	0.00361	-3.91508	-1.5494	-0.230728	CR609890.1		NDC80
11742707_a_at	0.21939	0.00361	3.91467	-1.5499	0.309955	BT006708.1		APOC2 /// APOC4-APOC2
11722230_a_at	0.21939	0.00361	-3.91456	-1.5501	-0.319537	BC098343.1		PDP1
11744061_at	0.21939	0.00362	3.91344	-1.5517	0.24623	CR611704.1		ACTR1B
11725495_a_at	0.21939	0.00363	-3.91156	-1.5543	-0.237842	BC112336.1		ROBO1
11740826_x_at	0.21939	0.00363	3.91155	-1.5543	0.30084	BC137544.1		TBATA
11762661_x_at	0.21939	0.00363	3.91138	-1.5546	0.314142	BC021819.1		ZNF248
11739598_a_at	0.21939	0.00363	3.91032	-1.5561	0.2122	AK304603.1		ZNF398
11756403_s_at	0.21939	0.00363	-3.91001	-1.5565	-0.292784	BG251478		KCTD10
11724668_at	0.21939	0.00364	3.90913	-1.5577	0.432546	NM_002195.1		INSL4
11733586_a_at	0.21939	0.00364	3.90889	-1.5581	0.223891	NM_003717.2		NPFF
11743440_at	0.21939	0.00364	-3.90828	-1.5589	-0.252483	BE644608		PDIA3
11762484_at	0.21939	0.00364	-3.9082	-1.5591	-0.278353	BC030058.1		TTF2
11740795_at	0.21939	0.00365	3.90723	-1.5604	0.251282	NM_025213.2		SPTBN4
11759039_at	0.21939	0.00367	-3.90405	-1.5649	-0.263969	BQ028458		SVIP
11754357_a_at	0.21939	0.00368	-3.90258	-1.567	-0.23462	BU682813		FLNB
11735073_a_at	0.21939	0.00368	3.90257	-1.567	0.243901	NM_173539.2		ZNF596
11738020_at	0.21939	0.00368	3.90248	-1.5671	0.301421	BC101509.1		RXFP4
11740203_a_at	0.21939	0.00368	-3.90202	-1.5678	-0.23501	BC015994.1		BORCS7 /// BORCS7-ASMT
11733125_a_at	0.21939	0.00369	-3.8997	-1.5711	-0.217847	AK300368.1		PEX19
11749079_a_at	0.21939	0.00369	-3.89937	-1.5715	-0.322401	BC005917.1		GTF2E1
11742589_at	0.21939	0.0037	3.89875	-1.5724	0.217955	NM_001004717.1		OR4L1
11751645_x_at	0.21939	0.0037	3.89845	-1.5728	0.320821	AK300544.1		PBXIP1
11727868_a_at	0.21939	0.0037	-3.89841	-1.5729	-0.227857	NM_002044.2		GALK2
11720825_s_at	0.21939	0.0037	3.89822	-1.5732	0.285076	BC098393.1		JAG1
11757486_s_at	0.21939	0.00371	-3.89608	-1.5762	-0.220669	AI338378		NIT1
11733294_at	0.21939	0.00372	-3.89467	-1.5782	-0.236972	NM_198513.1		PHF20L1
11723947_a_at	0.21939	0.00373	-3.89303	-1.5805	-0.211413	BC007985.2		ACSL5
11755242_a_at	0.21939	0.00373	-3.89289	-1.5807	-0.37846	X15219.1		SKIL
11763890_at	0.21939	0.00373	3.89241	-1.5814	0.403476	AA215701		EIF5 /// SNORA28
11758216_s_at	0.21939	0.00374	3.89183	-1.5822	0.323867	BQ218024		SOX9
11740008_s_at	0.21939	0.00374	-3.89127	-1.583	-0.348812	BC101348.2		CHRFAM7A /// CHRNA7 /// LOC101929970
11720656_a_at	0.21939	0.00374	-3.89112	-1.5832	-0.229438	CD245921		BBX
11725479_at	0.21939	0.00374	3.89012	-1.5846	0.29767	AK291711.1		OVOL1
11747829_x_at	0.21939	0.00375	3.88935	-1.5857	0.249807	AB440195.1		TCF7L2
11756832_a_at	0.21939	0.00375	3.88847	-1.5869	0.234739	AK312813.1		EGR2
11737798_a_at	0.21939	0.00376	-3.88727	-1.5886	-0.250353	NM_006404.3		PROCR
11742636_at	0.21939	0.00376	3.8871	-1.5889	0.304159	NM_001042376.1		INS-IGF2
11731968_a_at	0.21939	0.00376	3.8869	-1.5891	0.297064	AF142567.1		CACNA1I
11732355_x_at	0.21939	0.00376	-3.8867	-1.5894	-0.30747	NM_001098479.1		HLA-F
11732248_at	0.21939	0.00377	3.88635	-1.5899	0.269181	NM_005654.4		NR2F1
11741138_a_at	0.21981	0.00378	3.88386	-1.5935	0.279748	AK291817.1		GSDMD
11733475_s_at	0.21981	0.00378	3.88326	-1.5943	0.23895	NM_002240.2		KCNJ6
11717389_a_at	0.21981	0.00379	-3.88274	-1.595	-0.27855	BC008083.2		2020-09-11
AFFX-PheX-M_at	0.2209	0.00382	-3.87745	-1.6025	-0.29629			---	AFFX-PheX-M_at
11742763_a_at	0.2209	0.00382	-3.87722	-1.6028	-0.236285	BC109128.2		FAM214A
11717983_a_at	0.2209	0.00382	-3.87718	-1.6029	-0.297814	DB363223		GGPS1
11738910_at	0.22108	0.00383	3.87586	-1.6048	0.262796	NM_033180.4		OR51B2
11754397_at	0.22146	0.00384	-3.87394	-1.6075	-0.225275	BM904023		SMIM10
11738039_a_at	0.22186	0.00385	-3.87199	-1.6103	-0.275445	BC104776.1		PCDHAC2
11735518_at	0.22236	0.00386	3.86974	-1.6134	0.222915	NM_032580.2		HES7
11719435_a_at	0.2226	0.00387	-3.86824	-1.6156	-0.236414	NM_002334.2		LRP4
11728287_at	0.22298	0.00389	-3.86582	-1.619	-0.448748	BQ006858		RHOQ
11756973_a_at	0.22298	0.00389	-3.8656	-1.6193	-0.270663	CR626625.1		RAD18
11715411_a_at	0.22304	0.0039	-3.86369	-1.622	-0.207776	NM_001430.3		EPAS1
11723084_x_at	0.22304	0.0039	3.86316	-1.6228	0.223523	NM_001037.3		SCN1B
11740802_a_at	0.22304	0.0039	3.86302	-1.623	0.254232	NM_183245.1		INVS
11741342_a_at	0.22304	0.00391	3.86237	-1.6239	0.221671	BC063646.1		COL9A1
11740745_a_at	0.22431	0.00394	-3.85695	-1.6316	-0.331888	BC075805.1		OPA1
11723393_a_at	0.22431	0.00394	3.85676	-1.6318	0.264663	AY044449.1		ALPK3
11728563_at	0.22431	0.00394	3.85635	-1.6324	0.298741	NM_004472.2		FOXD1
11719753_a_at	0.22446	0.00395	3.85515	-1.6341	0.256056	NM_182920.1		ADAMTS9
11732775_a_at	0.22456	0.00396	3.8541	-1.6356	0.256626	BC051864.1		DNMT3A
11718964_at	0.22465	0.00396	-3.85309	-1.6371	-0.228246	AI193991		NUFIP2
11761801_x_at	0.22491	0.00398	3.84968	-1.6419	0.233644	AK304495.1		MAP4K2
11719774_a_at	0.22491	0.00398	-3.84967	-1.6419	-0.295104	CD366225		C5orf24
11740148_x_at	0.22491	0.00398	3.8492	-1.6426	0.291346	NM_001001415.2		ZNF429
11723648_at	0.22491	0.00399	-3.84811	-1.6441	-0.255651	NM_005880.3		DNAJA2
11730106_a_at	0.22491	0.00399	3.84759	-1.6449	0.274934	NM_015192.2		PLCB1
11719105_at	0.22491	0.004	-3.84652	-1.6464	-0.212068	AK292912.1		CPNE3
11746148_a_at	0.22491	0.004	3.84645	-1.6465	0.315267	AK289627.1		SLC25A29
11727431_s_at	0.22491	0.004	-3.84589	-1.6473	-0.31741	NM_018936.2		PCDHB2 /// PCDHB3
11740147_a_at	0.22491	0.00401	3.84487	-1.6487	0.233573	BM126172		NRG2
11745228_s_at	0.22491	0.00402	-3.84293	-1.6515	-0.263212	CA436851		TMEM144
11739536_x_at	0.22491	0.00403	-3.84248	-1.6521	-0.300062	AK316350.1		FN1
11722740_a_at	0.22491	0.00403	3.84157	-1.6534	0.273849	NM_001082971.1		DDC
11756519_x_at	0.22491	0.00403	3.84141	-1.6536	0.243496	AK308594.1		LMO3
11742846_a_at	0.22491	0.00404	-3.8403	-1.6552	-0.273226	BC036216.1		CUL4B
AFFX-r2-TagO-3_at	0.22491	0.00404	3.83959	-1.6562	0.378707			---	AFFX-r2-TagO-3_at
11754906_a_at	0.22491	0.00405	-3.83835	-1.658	-0.257803	AK092216.1		PTBP2
11741832_a_at	0.22491	0.00405	-3.83806	-1.6584	-0.220405	NM_022804.2		SNRPN /// SNURF
11740278_s_at	0.22491	0.00406	-3.83754	-1.6591	-0.224693	NM_138766.1		PAM
11738891_at	0.22491	0.00406	3.83736	-1.6594	0.227015	NM_001012709.1		KRTAP5-4
11761726_a_at	0.22491	0.00409	-3.83249	-1.6663	-0.293175	BC031237.1		ANKRD30BP3
11761906_a_at	0.22491	0.00409	3.83171	-1.6674	0.299955	AK299253.1		MGAT4C
11742669_s_at	0.22491	0.0041	-3.83077	-1.6688	-0.267897	NM_001034077.4		HIST2H4A /// HIST2H4B
11724360_s_at	0.22491	0.0041	-3.83027	-1.6695	-0.234056	NM_033637.2		BTRC
11759397_x_at	0.22491	0.0041	-3.82991	-1.67	-0.220255	NM_024018.1		BTN2A3P
11725256_at	0.22491	0.00411	3.82856	-1.6719	0.273645	BC074998.2		FZD10
11730748_x_at	0.22491	0.00413	-3.82586	-1.6758	-0.22628	BC001716.1		PAIP2
11741911_a_at	0.22491	0.00413	-3.82568	-1.676	-0.256819	BC140837.1		GBP3
11736314_x_at	0.22491	0.00413	3.82557	-1.6762	0.257959	BC117435.1		POU5F1
11719908_a_at	0.22491	0.00415	-3.82294	-1.6799	-0.286581	NM_001005749.1		GBA /// GBAP1
11752955_a_at	0.22491	0.00415	3.82294	-1.6799	0.37989	AK302997.1		CEACAM22P
11723968_s_at	0.22491	0.00415	-3.82293	-1.6799	-0.272074	NM_024664.2		PPCS
11751126_s_at	0.22491	0.00415	3.82197	-1.6813	0.293982	AK298443.1		ABCC6 /// ABCC6P1 /// LOC105369239
11751181_a_at	0.22491	0.00415	3.82189	-1.6814	0.234781	AK299224.1		ZNF763
11739149_a_at	0.22491	0.00416	-3.82099	-1.6827	-0.264339	AI341137		SAMHD1
11732396_a_at	0.22491	0.00416	-3.82084	-1.6829	-0.264354	AK303410.1		IFT80
11719537_a_at	0.22491	0.00416	-3.82042	-1.6835	-0.236219	BC137492.1		CPXM2
11734305_a_at	0.22491	0.00416	-3.82042	-1.6835	-0.288961	NM_171846.1		LACTB
11755109_a_at	0.22491	0.00416	-3.82039	-1.6835	-0.286439	CX868116		CYFIP2
11715516_x_at	0.22491	0.00417	3.82009	-1.684	0.279608	NM_002809.2		PSMD3
11740638_at	0.22491	0.00417	3.81987	-1.6843	0.351107	BC034027.1		NOG
11716151_a_at	0.22491	0.00417	-3.81934	-1.685	-0.24463	CA448065		PMEPA1
11715624_at	0.22491	0.00417	-3.81932	-1.6851	-0.334807	NM_003022.2		SH3BGRL
11753689_x_at	0.22491	0.00417	-3.81893	-1.6856	-0.30982	AF385327.1		MDM2
11730362_a_at	0.22491	0.00418	-3.81801	-1.6869	-0.236297	NM_015237.2		KIAA1107
11724988_a_at	0.22491	0.00418	-3.81781	-1.6872	-0.266694	NM_014157.3		CCDC113
11721528_at	0.22491	0.00418	-3.81742	-1.6878	-0.313546	AB023584.1		ZDHHC2
11741262_x_at	0.22491	0.00418	-3.81719	-1.6881	-0.311022	AK296461.1		SORBS2
11725483_at	0.22491	0.00419	-3.81648	-1.6891	-0.297365	NM_001080421.1		UNC13A
11734726_x_at	0.22491	0.00419	-3.81604	-1.6897	-0.292695	BC053660.1		PNPT1
11720408_at	0.22491	0.0042	-3.8154	-1.6906	-0.214214	NM_014678.3		PPP6R2
11729478_at	0.22491	0.0042	3.81439	-1.6921	0.253952	NM_025261.1		LY6G6C
11748188_a_at	0.22491	0.0042	-3.81413	-1.6925	-0.228558	M29276.1		NAGA
11762469_at	0.22491	0.00423	3.81007	-1.6982	0.278278	M36707.1		CALML3
11723021_a_at	0.22491	0.00423	-3.80985	-1.6986	-0.232506	NM_183050.2		BCKDHB
11744881_s_at	0.22491	0.00423	3.80932	-1.6993	0.24228	AF448855.1		GLYCTK
11752592_a_at	0.22491	0.00424	-3.80894	-1.6998	-0.246528	AK299552.1		CEP170
11723930_at	0.22491	0.00424	-3.80886	-1.7	-0.300518	NM_012073.3		CCT5
11756862_a_at	0.22491	0.00424	3.80885	-1.7	0.244924	AK308925.1		DCLK1
11739771_a_at	0.22491	0.00424	-3.80862	-1.7003	-0.450767	AK292899.1		OXR1
11754185_a_at	0.22491	0.00425	3.80749	-1.7019	0.216618	BX538160.1		TRAF2
11763717_a_at	0.22491	0.00426	-3.80581	-1.7043	-0.250202	CR605750.1		CDKN1C
11754859_x_at	0.22491	0.00426	3.80535	-1.705	0.253734	AI809286		KIAA0226L
11729301_at	0.22491	0.00426	3.80516	-1.7052	0.289844	CR456927.1		GLYAT
11760691_at	0.22491	0.00427	3.80452	-1.7062	0.33012	AK304519.1		CHRDL2
11759333_s_at	0.22491	0.00427	-3.80411	-1.7067	-0.366999	BC009471.1		AMACR /// C1QTNF3-AMACR
11761702_x_at	0.22491	0.00427	3.80372	-1.7073	0.273425	AK300429.1		ADAM33
11733817_s_at	0.22491	0.00428	3.80232	-1.7093	0.211989	NM_001449.4		FHL1
11749716_a_at	0.22491	0.00429	3.80115	-1.711	0.256003	BC025994.1		SLC4A8
11722655_s_at	0.22491	0.00429	-3.80085	-1.7114	-0.230216	BC047696.1		STK17A
11721856_a_at	0.22491	0.00429	-3.80074	-1.7115	-0.257724	NM_005482.2		PIGK
11719946_a_at	0.22491	0.00429	-3.80011	-1.7124	-0.225527	CR614253.1		PKNOX1
11741105_a_at	0.22491	0.0043	-3.79973	-1.713	-0.236641	AY634685.1		FHL2
11756639_a_at	0.22491	0.0043	3.79846	-1.7148	0.264767	AK308686.1		NFASC
11748196_a_at	0.22491	0.00431	-3.79818	-1.7152	-0.274384	AK298638.1		ACADSB
11718159_at	0.22491	0.00431	-3.79751	-1.7162	-0.228111	NM_004688.2		NMI
11761374_x_at	0.22491	0.00431	3.79738	-1.7163	0.369012	AK295548.1		AGPAT4
11727109_a_at	0.22561	0.00433	-3.79465	-1.7202	-0.382167	NM_013235.4		DROSHA
11762696_at	0.22566	0.00434	3.79381	-1.7214	0.294777	AF251058.1		ADAMTSL1
11757939_s_at	0.22587	0.00434	-3.79252	-1.7233	-0.24444	CA418765		2020-09-11
11722711_a_at	0.22589	0.00435	-3.79094	-1.7255	-0.239163	NM_001122764.1		PPOX
11720708_a_at	0.22589	0.00436	-3.79066	-1.7259	-0.231003	NM_138711.3		PPARG
11715796_s_at	0.22589	0.00437	-3.78931	-1.7279	-0.385294	BC007038.1		LUM
11761932_at	0.22589	0.00437	3.78901	-1.7283	0.302218	AK298087.1		TUBB4B
11746708_at	0.22589	0.00437	-3.78837	-1.7292	-0.264779	BC137367.1		LOC389834
11733554_a_at	0.22589	0.00437	3.78814	-1.7295	0.307375	DQ322591.1		PAX7
11722627_at	0.22589	0.00438	-3.78766	-1.7302	-0.27022	AI654745		KIAA1033
11734117_a_at	0.22623	0.00439	-3.78559	-1.7332	-0.282623	NM_006994.3		BTN3A3
11737796_a_at	0.22623	0.00439	-3.78491	-1.7342	-0.291199	BC136371.1		KIAA1524
AFFX-HUMISGF3A/M97935_MB_at	0.22623	0.0044	-3.78463	-1.7345	-0.255523			STAT1	AFFX-HUMISGF3A/M97935_MB_at
11754584_a_at	0.2276	0.00443	3.78	-1.7412	0.218645	AB073599.1		RHNO1
11727264_at	0.22764	0.00444	-3.77858	-1.7432	-0.245799	NM_025061.3		LRRC8E
11748892_a_at	0.22764	0.00444	3.7775	-1.7447	0.244278	AK301669.1		RBM42
11742131_x_at	0.22764	0.00445	3.77613	-1.7467	0.265777	NM_001024215.1		FBLIM1
11727790_x_at	0.22764	0.00446	-3.77523	-1.748	-0.31345	BC017387.1		SPP1
11731545_at	0.22764	0.00446	3.77494	-1.7484	0.214709	NM_015191.1		SIK2
11746027_a_at	0.22764	0.00447	-3.77455	-1.749	-0.281557	AK298754.1		NMI
11723578_a_at	0.22764	0.00447	-3.77362	-1.7503	-0.376795	AK299804.1		SMIM13
11758334_s_at	0.22764	0.00447	-3.77316	-1.751	-0.202868	BQ438852		BORA
11730081_a_at	0.22764	0.00448	-3.77294	-1.7513	-0.256296	AF319422.2		MTO1
11735024_a_at	0.22764	0.00448	-3.77286	-1.7514	-0.22366	BC012070.1		ZBTB7B
11748537_a_at	0.22764	0.00448	3.77182	-1.7529	0.228746	BC039202.1		LMOD3
11761186_at	0.22764	0.00449	3.77148	-1.7534	0.289637	AK304715.1		DDX31
11740388_a_at	0.22764	0.00449	-3.77109	-1.7539	-0.248018	NM_003220.2		TFAP2A
11725533_at	0.2277	0.00449	3.77025	-1.7551	0.214387	NM_133374.2		ZNF618
11736920_a_at	0.22836	0.00451	3.76768	-1.7588	0.375827	NM_001105539.1		ZBTB10
11736244_s_at	0.22837	0.00452	-3.76699	-1.7598	-0.25258	NM_003512.3		HIST1H2AC
11728083_at	0.22866	0.00453	3.76548	-1.7619	0.250609	NM_003647.2		DGKE
11749113_a_at	0.22909	0.00454	-3.76358	-1.7647	-0.346234	AK294855.1		DLG1
11760237_at	0.22945	0.00455	3.7619	-1.7671	0.259312	DQ470680.1		CRELD2
11731205_a_at	0.2296	0.00456	3.76081	-1.7686	0.258013	BC148299.2		SPATA33
11754521_a_at	0.22971	0.00457	-3.75982	-1.7701	-0.247882	CA429672		MBNL2
11763119_x_at	0.23062	0.00459	-3.75612	-1.7753	-0.266788	AY395526.1		---
11723998_at	0.23062	0.00459	-3.75592	-1.7756	-0.259369	AF225416.1		SPC25
11739932_a_at	0.23132	0.00461	-3.75328	-1.7794	-0.227617	AY457926.1		FAM111B
11747494_a_at	0.23137	0.00462	3.75248	-1.7806	0.26031	AK303206.1		AQP3
11720431_s_at	0.2316	0.00463	3.7511	-1.7825	0.345017	NM_001855.3		COL15A1
11758139_s_at	0.2316	0.00464	3.74991	-1.7842	0.38852	AA857096		SDC1
11715490_s_at	0.2316	0.00464	3.74984	-1.7843	0.658558	NM_000699.2		AMY1A /// AMY1B /// AMY1C /// AMY2A /// AMY2B /// AMYP1
11745740_x_at	0.2316	0.00464	-3.74896	-1.7856	-0.239431	AF330205.1		SCOC
11764112_at	0.2316	0.00465	3.74854	-1.7862	0.291597	AW971480		---
11740693_a_at	0.23198	0.00466	3.74681	-1.7887	0.288026	BC113483.1		FAM83C
11730797_a_at	0.23201	0.00466	-3.74605	-1.7898	-0.214939	NM_018691.2		FAM114A2
11724917_at	0.23224	0.00467	-3.74477	-1.7916	-0.406923	AK023165.1		TMTC3
11727537_at	0.23246	0.00469	-3.74286	-1.7944	-0.346097	NM_001870.2		CPA3
11724399_a_at	0.23246	0.00469	-3.74261	-1.7947	-0.235339	NM_001012967.1		DDX60L
11746845_a_at	0.23246	0.00469	-3.7421	-1.7955	-0.216052	AK291521.1		TMEM143
11743553_a_at	0.23246	0.0047	-3.74133	-1.7966	-0.250511	AJ005273.1		KIN
11728890_at	0.23246	0.0047	3.74086	-1.7972	0.307721	AB017167.1		SLIT1
11736961_at	0.23251	0.00471	-3.73956	-1.7991	-0.263614	NM_199450.2		ZNF365
11759653_at	0.23251	0.00471	3.73943	-1.7993	0.297421	EU159452.1		NRF1
11718709_a_at	0.23301	0.00474	-3.73613	-1.804	-0.23368	NM_198868.2		TBC1D9B
11749637_a_at	0.23301	0.00474	-3.7358	-1.8045	-0.224264	BC143268.1		SEC24B
11722859_at	0.23301	0.00474	3.73579	-1.8045	0.221166	BM673926		ZNF395
11723965_at	0.23301	0.00474	-3.73542	-1.805	-0.281251	NM_000027.2		AGA
11716947_at	0.23311	0.00475	3.73373	-1.8075	0.343377	AK027788.1		TM9SF3
11750551_a_at	0.23311	0.00476	-3.73263	-1.8091	-0.240369	Z25430.1		STK4
11759331_at	0.23311	0.00476	-3.73234	-1.8095	-0.338027	AW386170		B3GAT2
11726619_s_at	0.23311	0.00477	-3.73193	-1.8101	-0.252942	BC050441.1		C1GALT1C1
11749451_a_at	0.23311	0.00477	-3.73144	-1.8108	-0.255878	AK296697.1		DERA
11722114_a_at	0.23311	0.00477	-3.73127	-1.811	-0.288223	NM_012424.3		RPS6KC1
11723181_a_at	0.23315	0.00479	-3.72905	-1.8142	-0.207649	NM_002747.3		MAPK4
11755602_x_at	0.23315	0.00479	-3.72867	-1.8147	-0.233744	AL359213.1		ENO3
11747002_a_at	0.23315	0.0048	3.7276	-1.8163	0.396398	AK293366.1		CPA1
11731319_at	0.23315	0.0048	3.72712	-1.817	0.237326	NM_152559.2		WBSCR27
11753515_a_at	0.23315	0.0048	3.72673	-1.8175	0.298995	AY495333.1		IL32
11748670_a_at	0.23315	0.00481	3.726	-1.8186	0.245801	AK294919.1		PIK3R1
11736922_s_at	0.23315	0.00483	3.72394	-1.8215	0.239177	NM_002594.2		PCSK2
11737036_at	0.23315	0.00483	3.72393	-1.8216	0.248525	BC071675.1		TCEAL6
11723042_at	0.23315	0.00483	-3.72392	-1.8216	-0.239373	NM_003338.3		UBE2D1
11744915_a_at	0.23315	0.00483	-3.72307	-1.8228	-0.312977	BQ009101		NEGR1
11763935_at	0.23315	0.00484	3.72209	-1.8242	0.305088	NR_002227.2		DISC1 /// TSNAX-DISC1
11726203_a_at	0.23315	0.00484	-3.72197	-1.8244	-0.504467	BC032241.1		BANK1
11759097_a_at	0.23315	0.00484	3.72133	-1.8253	0.285752	BG290193		ZNF703
11721659_at	0.23315	0.00485	3.72093	-1.8259	0.304501	AI824831		LMO4
11758736_at	0.23315	0.00485	-3.72078	-1.8261	-0.308869	CA312122		PSMC2
11723877_at	0.23315	0.00485	3.72017	-1.827	0.332367	BC069573.1		KCNK5
11726354_at	0.23315	0.00485	-3.72004	-1.8271	-0.237837	BX119312		ENPP1
11754604_x_at	0.23315	0.00486	-3.71966	-1.8277	-0.287824	AK075463.1		SPP1
11724454_at	0.23317	0.00487	-3.71858	-1.8292	-0.275168	NM_003059.2		SLC22A4
11745563_s_at	0.23317	0.00487	-3.71804	-1.83	-0.231043	BC010145.2		DNAJC4
11762547_at	0.23317	0.00488	3.71713	-1.8313	0.332927	BC060814.1		AGAP1
11761668_at	0.23317	0.0049	3.71417	-1.8356	0.272848	AK304749.1		DMPK
11730677_a_at	0.23317	0.0049	-3.71386	-1.836	-0.214171	NM_020724.1		RNF150
11739097_x_at	0.23317	0.00491	3.71288	-1.8374	0.269046	BC002430.2		ALDH3A2
11757554_s_at	0.23317	0.00491	-3.71241	-1.8381	-0.200311	AA724603		PPT2
11738208_a_at	0.23317	0.00491	3.71231	-1.8383	0.318212	NM_001037968.3		ALAS2
11760475_at	0.23317	0.00491	3.71207	-1.8386	0.247869	BC005231.1		STK4
11724478_s_at	0.23317	0.00491	3.71198	-1.8387	0.312594	NM_005438.3		FOSL1
11750547_a_at	0.23317	0.00492	3.71186	-1.8389	0.223706	AK298735.1		GALNT14
11731367_x_at	0.23317	0.00492	3.71165	-1.8392	0.273685	AY039001.1		TSPAN32
11761728_a_at	0.23317	0.00492	-3.71145	-1.8395	-0.326101	EU327020.1		SMARCE1
11724715_a_at	0.23413	0.00495	-3.70766	-1.8449	-0.210483	NM_145119.2		PJA1
11735585_at	0.23413	0.00495	3.70753	-1.8451	0.257563	NM_007153.2		ZNF208
11731468_x_at	0.23443	0.00496	3.70579	-1.8476	0.250664	AF182276.1		CYP2E1
11737843_x_at	0.23443	0.00496	-3.70544	-1.8482	-0.221375	NM_058182.4		SMIM11A /// SMIM11B
11743451_s_at	0.23466	0.00497	-3.70418	-1.85	-0.368148	AK074882.1		ELOVL6
11738723_at	0.23467	0.00499	3.70272	-1.8521	0.254465	BC151149.1		OR2Z1
11726461_a_at	0.23467	0.00499	-3.70251	-1.8524	-0.207082	NM_144781.1		PDCD2
11740115_a_at	0.23467	0.00499	3.70214	-1.8529	0.253914	BC150604.1		CGN
11739068_a_at	0.23467	0.005	-3.70127	-1.8542	-0.222717	U59919.1		KIFAP3
11748524_x_at	0.23467	0.00501	-3.6991	-1.8573	-0.416364	AK304340.1		PIGK
11748841_a_at	0.23467	0.00502	-3.6988	-1.8577	-0.254399	AK304795.1		SAMHD1
11740030_s_at	0.23467	0.00502	-3.69878	-1.8577	-0.238233	AK301906.1		CREM
11718008_a_at	0.23467	0.00502	3.69868	-1.8579	0.215603	NM_152727.4		CPNE2
11750654_s_at	0.23467	0.00502	-3.6986	-1.858	-0.250168	BC144563.1		ITPR1
11757341_s_at	0.23467	0.00503	-3.69746	-1.8596	-0.27351	BI670250		OPTN
11761111_at	0.23467	0.00503	3.69706	-1.8602	0.245776	AK293932.1		SMARCD1
11719487_a_at	0.23467	0.00503	-3.69674	-1.8607	-0.212034	NM_001017402.1		LAMB3
11752899_s_at	0.23471	0.00504	-3.69499	-1.8632	-0.217494	BC012035.1		SEC62
11735281_a_at	0.23471	0.00505	-3.69387	-1.8648	-0.234453	AF129530.1		BTRC
11731955_a_at	0.23471	0.00506	3.69365	-1.8651	0.256085	NM_001127893.1		CEACAM19
11736249_x_at	0.23471	0.00506	-3.69364	-1.8652	-0.353874	NM_014736.4		KIAA0101
11734057_a_at	0.23471	0.00506	-3.6927	-1.8665	-0.288705	CB853126		PTGR2
11732700_x_at	0.23471	0.00507	-3.69178	-1.8678	-0.25935	NM_032471.4		PKIB
11734416_x_at	0.23471	0.00507	3.69162	-1.8681	0.227942	NM_001039127.3		ZNF718
11729526_a_at	0.23471	0.00507	3.69138	-1.8684	0.224559	BC051314.1		SLC37A2
11719278_a_at	0.23471	0.00507	3.69114	-1.8688	0.265326	NM_018337.2		ZNF444
11758805_at	0.23506	0.00509	3.68956	-1.871	0.336507	BE208480		NUDCD3
11725131_x_at	0.23515	0.00509	3.68871	-1.8723	0.227887	NM_001006933.1		TCEAL3
11719852_s_at	0.2359	0.00512	-3.68593	-1.8763	-0.223639	AK292038.1		2020-09-10
11732696_a_at	0.2359	0.00512	3.68543	-1.877	0.305686	NM_144622.2		DCST2
11742513_at	0.23683	0.00515	3.68184	-1.8822	0.25014	NM_001005236.2		OR1L1
11722348_a_at	0.23683	0.00515	-3.68121	-1.8831	-0.254574	NM_004726.2		REPS2
11757005_a_at	0.23683	0.00515	-3.68108	-1.8833	-0.323386	AK310143.1		FUCA1
11721437_a_at	0.23687	0.00516	3.68036	-1.8843	0.205723	CA432453		STC2
11759102_at	0.23694	0.00517	3.67956	-1.8855	0.277155	BQ045479		UBXN10
11734548_a_at	0.23698	0.00517	-3.67875	-1.8866	-0.253878	NM_000358.2		TGFBI
11751034_a_at	0.23698	0.00518	3.67782	-1.888	0.235746	AK304508.1		NLE1
11743187_at	0.23698	0.00519	-3.67624	-1.8903	-0.509497	AB037851.1		CFAP97
11756374_a_at	0.23698	0.00519	-3.67623	-1.8903	-0.240995	CR611624.1		TPST1
11732730_at	0.23698	0.0052	3.67566	-1.8911	0.249916	NM_018836.3		AJAP1
11729792_at	0.23698	0.0052	-3.6748	-1.8923	-0.339687	AF027156.1		MAN1A2
11717980_x_at	0.23698	0.0052	-3.6748	-1.8923	-0.220832	NM_000587.2		C7
11739040_s_at	0.23698	0.00521	-3.67407	-1.8934	-0.224611	BQ000588		GTF2H1
11752487_a_at	0.23698	0.00521	-3.67405	-1.8934	-0.239964	BC029868.1		SNX25
11736366_x_at	0.23699	0.00522	-3.67274	-1.8953	-0.243421	AB042719.1		MCM10
11763273_at	0.23699	0.00523	-3.67203	-1.8963	-0.232972	BQ187185		ZBTB8OS
11731143_a_at	0.23699	0.00523	-3.67167	-1.8969	-0.25777	NM_198827.3		ADGRD1
11724491_at	0.23699	0.00523	-3.67165	-1.8969	-0.220817	NM_145266.4		NUDCD2
11719991_x_at	0.23701	0.00523	3.671	-1.8978	0.212581	NM_033396.2		TNKS1BP1
11759526_a_at	0.23701	0.00525	3.6694	-1.9001	0.280817	AW015815		MGAT4B
11752515_a_at	0.23701	0.00525	3.66895	-1.9008	0.210396	AK301956.1		ODC1
11721502_at	0.23701	0.00526	-3.66836	-1.9016	-0.231813	NM_015055.2		SWAP70
11734103_a_at	0.23701	0.00527	-3.66681	-1.9039	-0.393484	NM_001113411.1		FGGY
11727797_at	0.23701	0.00528	-3.6657	-1.9055	-0.269102	BU630777		NDFIP2
11742477_x_at	0.23701	0.00528	-3.66545	-1.9058	-0.293912	NM_001145126.1		TRIM53AP
11751786_a_at	0.23701	0.00528	3.66493	-1.9066	0.253644	AK298640.1		CRNN
11724574_a_at	0.23701	0.00528	3.66492	-1.9066	0.200596	NM_032331.3		ECE2
11726947_a_at	0.23701	0.00529	3.66375	-1.9083	0.263833	AF245703.1		TLR8
11735802_a_at	0.23701	0.0053	3.66319	-1.9091	0.298646	BC113475.1		KCND3
11717607_at	0.23701	0.0053	-3.6629	-1.9095	-0.265264	BC105693.1		VMA21
11730747_a_at	0.23701	0.00531	-3.66163	-1.9114	-0.224196	BC001716.1		PAIP2
11763877_at	0.23701	0.00532	3.66071	-1.9127	0.308885	XM_001718745.1		LOC100128325
11746028_x_at	0.23701	0.00532	-3.6602	-1.9134	-0.237505	AK298754.1		NMI
11757135_x_at	0.23701	0.00532	3.66	-1.9137	0.231615	NR_002979.2		SNORA49
11730876_a_at	0.23701	0.00533	-3.65947	-1.9145	-0.203089	BC004277.1		FANCI
11724537_a_at	0.23701	0.00533	-3.65944	-1.9145	-0.255919	NM_004827.2		ABCG2
11763516_a_at	0.23701	0.00533	-3.65939	-1.9146	-0.231952	AK096516.1		CPT1C
11720188_a_at	0.23701	0.00533	-3.65899	-1.9152	-0.215789	NM_005001.2		NDUFA7
11754184_a_at	0.23701	0.00533	-3.6589	-1.9153	-0.208862	BX538027.1		ALDH1A3
11757903_s_at	0.23701	0.00534	-3.65864	-1.9157	-0.260196	AI581340		COL4A5
11720041_x_at	0.23728	0.00536	-3.65583	-1.9197	-0.213299	CR457207.1		VTA1
11718395_s_at	0.23728	0.00536	3.6556	-1.9201	0.418455	BC006175.1		JUN
11729516_a_at	0.23728	0.00536	-3.65551	-1.9202	-0.215768	NM_032186.3		ZNF644
11748984_a_at	0.23728	0.00536	-3.65532	-1.9205	-0.233429	AK301376.1		VTA1
11719917_at	0.23728	0.00537	-3.65501	-1.9209	-0.201304	BC007650.1		PELO
11732793_a_at	0.23743	0.00538	-3.65315	-1.9236	-0.201166	NM_004100.4		EYA4
11726046_s_at	0.23743	0.00538	3.65307	-1.9237	0.276077	BC146678.1		FCGR2B
11744806_at	0.23743	0.00538	3.65286	-1.924	0.325287	AF222903.1		PPY2P
11743950_s_at	0.23747	0.00539	3.65213	-1.9251	0.27098	DB517338		POU4F1
11755248_x_at	0.23747	0.00542	-3.64882	-1.9299	-0.227452	BX648761.1		PPFIBP1
11723729_at	0.23747	0.00542	3.64876	-1.93	0.374741	BC063787.1		KREMEN1
11719041_at	0.23747	0.00542	3.64842	-1.9305	0.237236	NM_134268.3		CYGB
11736026_at	0.23747	0.00542	-3.64841	-1.9305	-0.266719	NM_001110.2		ADAM10
11757860_s_at	0.23747	0.00542	-3.64836	-1.9306	-0.356345	AI280298		QKI
11732913_a_at	0.23747	0.00543	3.6474	-1.932	0.221726	NM_001005176.2		SP140
11757965_s_at	0.23747	0.00543	3.64722	-1.9322	0.392929	AI807251		C7orf62
11749636_a_at	0.23747	0.00543	-3.64697	-1.9326	-0.20788	BC054003.1		DROSHA
11754264_a_at	0.23747	0.00544	3.64664	-1.9331	0.224447	AB209662.1		KHSRP
11722052_at	0.23747	0.00544	3.64643	-1.9334	0.239778	NM_015993.1		PLLP
11726652_a_at	0.23754	0.00545	-3.64511	-1.9353	-0.241939	EF127492.1		ARHGAP32
11739445_s_at	0.23754	0.00545	3.64493	-1.9355	0.241986	AK291944.1		DPF2
11750530_x_at	0.23754	0.00546	-3.64377	-1.9372	-0.209549	AY337578.1		ASB9
11728617_at	0.23754	0.00547	-3.64309	-1.9382	-0.234402	NM_032587.3		CARD6
11740217_x_at	0.23754	0.00547	-3.6426	-1.9389	-0.218694	NM_198271.3		LMOD3
11726259_s_at	0.23754	0.00547	-3.64226	-1.9394	-0.205683	BX503543		RNF141
11716620_a_at	0.23754	0.00547	-3.64203	-1.9397	-0.273011	NM_002270.3		TNPO1
11722406_at	0.23754	0.00548	3.64142	-1.9406	0.352988	NM_004567.2		PFKFB4
11753307_a_at	0.23754	0.00548	3.6411	-1.9411	0.220818	BC107097.1		UPK1A
11761198_at	0.23768	0.00549	3.64017	-1.9424	0.298334	AK301091.1		TMEM161B
11718658_s_at	0.23768	0.0055	3.63846	-1.9449	0.327871	NM_001773.2		CD34
11730691_s_at	0.23768	0.00551	-3.63792	-1.9457	-0.275938	NM_001135745.1		ALS2
11724816_a_at	0.23768	0.00551	3.63788	-1.9457	0.244333	BC015806.1		SH3KBP1
11722105_s_at	0.23768	0.00551	-3.6378	-1.9459	-0.262393	NM_002643.3		PIGF
11745887_a_at	0.23768	0.00553	3.63578	-1.9488	0.258118	AW976266		USP42
11754228_x_at	0.23768	0.00553	-3.63553	-1.9492	-0.212318	BP391583		RPL23AP82
11719697_a_at	0.23768	0.00554	-3.63484	-1.9502	-0.235157	NM_016126.2		HSPB11
11758093_s_at	0.23768	0.00554	-3.63473	-1.9503	-0.46782	N34849		FBN1
11717882_a_at	0.23768	0.00554	-3.63447	-1.9507	-0.215414	NM_032434.2		ZNF512
11743705_at	0.23768	0.00554	-3.63434	-1.9509	-0.217115	BQ018004		ETAA1
11730098_at	0.23768	0.00554	3.63396	-1.9514	0.275212	NM_022142.3		ELSPBP1
11716701_a_at	0.23841	0.00557	-3.63143	-1.9551	-0.206497	AF082569.1		CCNDBP1
11744464_a_at	0.23853	0.00557	-3.6304	-1.9566	-0.267052	AY601647.1		SNX25
11726751_at	0.23853	0.00558	3.62981	-1.9574	0.332464	BC006434.1		MAP6D1
11719211_a_at	0.23853	0.00559	-3.62823	-1.9597	-0.305606	BC112323.1		HSF2
11721837_a_at	0.23853	0.00559	-3.62804	-1.96	-0.228864	CA432076		MYLK
11720716_a_at	0.23853	0.00559	-3.628	-1.9601	-0.323703	AK289960.1		FGF13
11732410_a_at	0.23853	0.0056	3.62774	-1.9604	0.255962	AK289588.1		GPER1
11715710_s_at	0.23932	0.00562	-3.6247	-1.9649	-0.238393	NM_001814.4		CTSC
11718358_at	0.23932	0.00563	3.62449	-1.9652	0.195764	W94949		PEG10
11763018_x_at	0.23969	0.00564	3.62295	-1.9674	0.271659	AK301276.1		HSPD1
11754738_a_at	0.23971	0.00565	-3.6218	-1.9691	-0.225209	AK095024.1		PDE2A
11723975_x_at	0.23971	0.00565	3.62177	-1.9691	0.225626	NM_145641.1		APOL3
11753708_a_at	0.23983	0.00566	3.62051	-1.9709	0.212283	AY364638.1		CIDEC
AFFX-r2-TagQ-3_at	0.23983	0.00566	3.62034	-1.9712	0.350682			---	AFFX-r2-TagQ-3_at
11746409_a_at	0.24008	0.00568	3.61834	-1.9741	0.21818	AK298590.1		LPAR1
11719185_x_at	0.24008	0.00568	-3.61802	-1.9745	-0.351068	BC010643.1		N4BP2L2
11759866_at	0.24008	0.00569	3.61736	-1.9755	0.369638	AY831680.1		---
11717965_s_at	0.24008	0.00569	-3.61731	-1.9756	-0.196839	NM_033360.2		KRAS
11743245_at	0.24008	0.00569	3.6169	-1.9762	0.399648	NM_001005167.1		OR52E6
11735779_a_at	0.2403	0.0057	3.61577	-1.9778	0.282062	BC130327.1		CD101
11721926_at	0.24037	0.00571	3.61463	-1.9795	0.213536	BC116451.1		BCL9
11743203_at	0.24037	0.00572	3.61401	-1.9804	0.25375	BC113604.1		TMEM257
11735581_a_at	0.24037	0.00573	-3.61303	-1.9818	-0.253808	NM_133486.1		MBNL3
11722476_x_at	0.24037	0.00573	-3.61298	-1.9819	-0.244827	NM_182523.1		CMC1
11759740_x_at	0.24037	0.00573	-3.61257	-1.9825	-0.349764	BC010944.1		CDC23
11717876_a_at	0.24037	0.00573	-3.61228	-1.9829	-0.295799	U22816.1		PPFIA1
11732460_a_at	0.24041	0.00574	3.61164	-1.9838	0.245928	NM_024889.3		PLEKHS1
11718396_x_at	0.24042	0.00574	3.61105	-1.9847	0.405425	BC006175.1		JUN
11735800_at	0.24064	0.00576	3.60957	-1.9868	0.313954	BC074792.2		P2RX3
11755906_a_at	0.24064	0.00576	3.60921	-1.9873	0.250071	AJ420590.1		FAM135A
11749755_a_at	0.24064	0.00576	-3.60883	-1.9879	-0.344752	AK297715.1		ZNF791
11751679_a_at	0.24106	0.00578	3.60664	-1.9911	0.254433	AK300536.1		RASL12
11721543_a_at	0.24106	0.00578	3.60661	-1.9911	0.21712	NM_033027.3		CSRNP1
11742096_x_at	0.2411	0.0058	3.60526	-1.9931	0.240408	NM_016510.4		SCLY /// UBE2F-SCLY
AFFX-LysX-5_at	0.2411	0.0058	-3.60519	-1.9932	-0.321098			---	AFFX-LysX-5_at
11738846_a_at	0.2411	0.0058	-3.60488	-1.9936	-0.272581	NM_170681.1		GFM2
11762461_x_at	0.24148	0.00582	3.6027	-1.9968	0.245202	L20860.1		SEPT5-GP1BB
11720201_at	0.24148	0.00582	-3.60232	-1.9974	-0.218997	M29971.1		MGMT
11763613_a_at	0.24148	0.00584	3.60062	-1.9998	0.227218	BC144580.1		LINC00885
AFFX-PheX-3_at	0.24148	0.00584	-3.60057	-1.9999	-0.196437			---	AFFX-PheX-3_at
11720340_a_at	0.24148	0.00584	3.60031	-2.0003	0.216885	NM_004603.2		STX1A
11755964_a_at	0.24148	0.00584	3.59992	-2.0008	0.252866	BC125179.1		NRXN1
11728559_a_at	0.24148	0.00585	3.59952	-2.0014	0.211582	NM_001671.3		ASGR1
11719043_x_at	0.24148	0.00586	3.59861	-2.0027	0.226845	BQ642058		ALKBH5
11723377_a_at	0.24148	0.00586	-3.59792	-2.0037	-0.274721	NM_001018100.2		MYZAP
11735838_a_at	0.24148	0.00587	3.597	-2.0051	0.249415	BC144065.1		MADCAM1
11740390_a_at	0.24148	0.00587	-3.59656	-2.0057	-0.213991	NM_019027.3		RBM47
11723372_a_at	0.24148	0.00588	-3.59619	-2.0063	-0.310918	NM_144658.3		DOCK11
11734784_a_at	0.24148	0.00588	-3.59542	-2.0074	-0.19368	AI129485		CLIC2
11732376_a_at	0.24148	0.00589	-3.59506	-2.0079	-0.240788	BC031642.1		TBC1D19
11759727_x_at	0.24148	0.00589	3.59467	-2.0085	0.236396	BC009182.2		C14orf159
11736469_a_at	0.24148	0.0059	-3.59393	-2.0096	-0.269454	BC112031.1		SLC35D1
11749489_a_at	0.24148	0.0059	3.59393	-2.0096	0.251191	AK299035.1		IFT140
11733560_a_at	0.24148	0.0059	-3.59364	-2.01	-0.242599	NM_152994.3		PPP1R21
11736725_a_at	0.24148	0.0059	3.59363	-2.01	0.339674	AK295093.1		SPECC1
11733181_at	0.24176	0.00592	-3.59174	-2.0127	-0.247165	NM_004956.3		ETV1
11751048_x_at	0.24176	0.00592	-3.59146	-2.0131	-0.313759	AK298564.1		CASC4
11724178_a_at	0.24176	0.00592	3.59115	-2.0136	0.215418	NM_015345.2		DAAM2
11747833_a_at	0.24176	0.00593	-3.59071	-2.0142	-0.19655	AK302880.1		KLF11
11753059_x_at	0.24176	0.00593	-3.59009	-2.0151	-0.236096	BC032302.1		UGGT2
11748372_a_at	0.24176	0.00594	-3.5897	-2.0157	-0.401502	AK294885.1		C16orf62
11720379_s_at	0.24191	0.00595	-3.58877	-2.0171	-0.217384	NM_000512.4		GALNS
11734124_a_at	0.24196	0.00596	3.58766	-2.0187	0.498021	BC024300.1		FSTL4
11726310_at	0.24196	0.00596	-3.5873	-2.0192	-0.386248	AK290617.1		GLRB
11752283_a_at	0.24196	0.00596	3.58706	-2.0196	0.225428	AK298095.1		ALOX15B
11734769_a_at	0.24337	0.006	-3.58267	-2.0259	-0.224898	AF441770.1		THOC2
11727068_at	0.24337	0.00601	3.58226	-2.0265	0.20287	NM_170744.3		UNC5B
AFFX-r2-Bs-phe-3_at	0.24428	0.00603	-3.57933	-2.0308	-0.225788			---	AFFX-r2-Bs-phe-3_at
11764205_at	0.24428	0.00604	3.57839	-2.0322	0.20467	BX114808		LOC105377603
11736250_a_at	0.24428	0.00604	-3.57817	-2.0325	-0.22423	AK290748.1		KIAA0101
11758373_s_at	0.24428	0.00605	3.57751	-2.0335	0.202293	AL575726		NTF3
11748726_s_at	0.24428	0.00606	3.57637	-2.0351	0.264931	AK298001.1		FAM107A
11760425_a_at	0.24428	0.00607	3.57592	-2.0358	0.221184	AK301141.1		IL6
11743427_at	0.24428	0.00608	-3.5744	-2.038	-0.214164	BF037388		AHCYL1
11743050_a_at	0.24428	0.00609	-3.57353	-2.0392	-0.198277	AY512565.1		DNAJC15
11730453_a_at	0.24428	0.0061	3.57251	-2.0407	0.215943	BC110503.1		KIF24
11729130_at	0.24428	0.0061	-3.57239	-2.0409	-0.225218	NM_173473.2		ANAPC16
11720487_a_at	0.24428	0.0061	-3.57222	-2.0412	-0.208818	BC008205.1		HEBP2
11748876_a_at	0.24428	0.00611	-3.57166	-2.042	-0.238811	AK298438.1		RCBTB2
11719224_s_at	0.24428	0.00611	-3.57145	-2.0423	-0.198331	NM_144576.3		COQ10A
11754774_s_at	0.24428	0.00611	3.57132	-2.0425	0.224222	AK091665.1		NPAS2
11748093_x_at	0.24428	0.00611	3.5712	-2.0426	0.22508	AK302571.1		RIMS1
11740239_a_at	0.24428	0.00611	3.57085	-2.0432	0.206319	AK302120.1		CFAP161
11731133_at	0.24428	0.00612	3.57025	-2.044	0.228923	NM_025224.2		ZBTB46
11729992_at	0.24428	0.00612	3.57007	-2.0443	0.389298	NM_133637.2		DQX1
11719659_x_at	0.24428	0.00613	3.56935	-2.0453	0.24951	BC052271.1		ATP1A2
11740758_a_at	0.24428	0.00613	-3.56876	-2.0462	-0.315731	NM_001005732.1		MIR99AHG
11733645_a_at	0.24428	0.00614	-3.56782	-2.0476	-0.251424	NM_001032998.1		KYNU
11740578_a_at	0.24428	0.00614	-3.56763	-2.0479	-0.265418	NM_018302.2		C4orf19
11737434_x_at	0.24428	0.00614	-3.5676	-2.0479	-0.368855	NM_024780.4		TMC5
11718999_x_at	0.24428	0.00615	-3.56732	-2.0483	-0.224803	BC000192.1		DHFR
11723007_a_at	0.24439	0.00616	-3.56559	-2.0508	-0.301756	AB033080.2		CCPG1 /// DYX1C1-CCPG1
11743049_at	0.24439	0.00617	-3.56513	-2.0515	-0.248601	BE669840		DNAJC15
11750606_a_at	0.24439	0.00617	3.56456	-2.0523	0.304877	AK298237.1		CD101
11717308_a_at	0.24439	0.00618	-3.56383	-2.0534	-0.306544	NM_032168.1		WDR75
11730164_a_at	0.24439	0.00619	-3.56305	-2.0545	-0.337087	NM_001005207.2		TRIM37
11734847_x_at	0.24439	0.00619	-3.56299	-2.0546	-0.434809	NM_018695.2		ERBB2IP
11763591_a_at	0.24439	0.0062	3.56176	-2.0564	0.250404	AK131238.1		ZDHHC8
11761674_a_at	0.24439	0.00621	3.56059	-2.0581	0.228249	AK294471.1		PLA2G7
11763212_at	0.24439	0.00622	-3.5598	-2.0593	-0.292794	BM677664		CBLB
11742534_at	0.24439	0.00622	3.5598	-2.0593	0.217692	NM_001105517.1		FAM58BP
11763821_at	0.24439	0.00622	3.55968	-2.0594	0.214684	AK311168.1		CHST1
11733224_at	0.24439	0.00622	3.55933	-2.06	0.306648	NM_021216.4		ZNF71
11732778_at	0.24439	0.00622	3.55925	-2.0601	0.245787	NM_020393.2		PGLYRP4
11750476_a_at	0.24439	0.00623	-3.55852	-2.0611	-0.251334	BC140003.1		CSMD3
11740959_a_at	0.24439	0.00624	-3.55734	-2.0629	-0.232985	NM_004019.2		DMD
11741321_a_at	0.24439	0.00625	-3.55655	-2.064	-0.279908	AK289379.1		CREM
11723045_x_at	0.24439	0.00625	-3.55642	-2.0642	-0.193228	NM_004477.2		FRG1 /// FRG1BP /// FRG1CP /// FRG1DP /// FRG1EP /// LOC101930531 /// LOC102723780 /// LOC102724813
11753463_a_at	0.24439	0.00626	3.55576	-2.0652	0.22737	AK295785.1		SLC2A5
11722198_a_at	0.24439	0.00626	-3.55575	-2.0652	-0.330939	NM_003339.2		UBE2D2
11742909_at	0.24439	0.00627	-3.55506	-2.0662	-0.283587	BM979120		ANKRD50
11726951_s_at	0.24439	0.00627	3.55489	-2.0664	0.221246	NM_014690.4		FAM131B
11730173_at	0.24439	0.00627	-3.55437	-2.0672	-0.211913	BM473210		C4orf3
11751418_a_at	0.24439	0.00627	3.55428	-2.0673	0.23069	AK294268.1		PSD4
11759672_x_at	0.24439	0.00628	-3.55405	-2.0677	-0.272337	BC111021.1		UGGT2
11739227_a_at	0.24439	0.00628	-3.5538	-2.068	-0.237331	BE963245		FBXW11
11756096_a_at	0.24439	0.00628	-3.55349	-2.0685	-0.315643	J03593.1		SLC25A4
11719817_x_at	0.24439	0.00629	-3.55281	-2.0695	-0.226802	AF007551.1		BET1
11721732_at	0.24439	0.00629	-3.55268	-2.0697	-0.282848	BQ020627		TMX3
11764234_s_at	0.24439	0.00629	-3.55222	-2.0703	-0.246158	DB299553		INTS7
11733287_a_at	0.2444	0.0063	-3.55168	-2.0711	-0.248611	BC020616.1		CYP20A1
11742980_a_at	0.24457	0.00631	3.55074	-2.0725	0.268497	CA771091		ANKS1B
11744068_x_at	0.24471	0.00632	3.54939	-2.0745	0.253466	BF966575		APOE
11724840_at	0.24471	0.00632	-3.54936	-2.0745	-0.228768	BC062620.1		PKN2
11751591_s_at	0.24477	0.00633	-3.54869	-2.0755	-0.277301	BC012081.1		RMND1
11738855_a_at	0.24498	0.00634	3.54763	-2.077	0.21349	NM_020328.2		ACVR1B
11717948_at	0.24509	0.00635	-3.54637	-2.0789	-0.230915	NM_001008215.1		COA5
11721460_s_at	0.24509	0.00635	-3.54634	-2.0789	-0.238783	NM_018009.4		TAPBPL
11756631_s_at	0.24546	0.00637	-3.54442	-2.0817	-0.230798	AK307529.1		TXNDC15
11717077_x_at	0.24546	0.00637	-3.54437	-2.0818	-0.209754	CR533476.1		ZFAND6
11739984_a_at	0.24558	0.00638	3.54314	-2.0836	0.336933	AK289423.1		HAO1
11757539_s_at	0.24558	0.00638	-3.54307	-2.0837	-0.239757	T97323		STIM2
11760278_at	0.24583	0.0064	3.54191	-2.0854	0.246121	AY358246.1		HCG8 /// ZNRD1-AS1
11736211_at	0.24603	0.00641	-3.54089	-2.0869	-0.257476	NM_024026.4		MRPL57
11726615_a_at	0.24604	0.00641	-3.54037	-2.0876	-0.320879	CK724900		CDH2
11759550_at	0.24609	0.00642	3.53953	-2.0889	0.229323	CR936805.1		ZFAS1
11742243_a_at	0.24609	0.00643	3.53881	-2.0899	0.248027	AB078027.1		ATF3
11745915_x_at	0.24609	0.00643	3.53873	-2.09	0.297885	AK123221.1		GOLGA8A /// GOLGA8B
11730864_s_at	0.24686	0.00646	-3.53554	-2.0947	-0.197894	BC016029.1		CTTNBP2NL
11748056_a_at	0.24686	0.00646	3.53512	-2.0953	0.234458	AK301687.1		SOX15
11760503_a_at	0.24686	0.00647	-3.53434	-2.0965	-0.199661	AB093206.1		RASSF8
11736697_x_at	0.24686	0.00647	3.53407	-2.0968	0.325528	EF560739.1		ERN2
11762899_at	0.24686	0.00648	3.53372	-2.0974	0.209787	BC061914.1		APOBEC3G
11754879_a_at	0.24686	0.00648	-3.53298	-2.0984	-0.388464	AK095159.1		SDR16C5
11716063_at	0.24686	0.00649	3.53278	-2.0987	0.361226	NM_002160.2		TNC
11730831_x_at	0.24686	0.00649	-3.53224	-2.0995	-0.263028	NM_032138.4		KBTBD7
11763931_x_at	0.24686	0.00651	-3.53084	-2.1016	-0.192358	NR_003255.2		---
11724387_at	0.24686	0.00651	-3.5306	-2.1019	-0.19106	NM_002145.3		HOXB2
11722531_a_at	0.24686	0.00652	-3.52992	-2.1029	-0.272568	BQ010124		CALD1
11756134_a_at	0.24686	0.00652	-3.52962	-2.1034	-0.194452	CR936799.1		FHL2
11758452_s_at	0.24686	0.00652	-3.52917	-2.104	-0.259257	AA845564		CENPQ
11741701_x_at	0.24686	0.00652	-3.52908	-2.1041	-0.297095	NM_021058.3		HIST1H2BJ
11745836_x_at	0.24686	0.00653	-3.52868	-2.1047	-0.2557	AK295004.1		DYSF
11731137_a_at	0.24686	0.00653	-3.52853	-2.1049	-0.358438	AF328296.1		MYPN
11761210_at	0.24686	0.00653	3.52835	-2.1052	0.304595	BC020750.1		SDS
11758382_s_at	0.24688	0.00654	-3.52782	-2.106	-0.246778	BQ004763		ABCC9
11735625_a_at	0.24712	0.00655	3.52669	-2.1076	0.318372	NM_182659.1		UTY
11740384_a_at	0.24712	0.00656	3.52561	-2.1092	0.239631	NM_014238.1		KSR1
11720464_x_at	0.24712	0.00656	-3.52554	-2.1093	-0.284538	AY358896.1		F11R
11724833_at	0.24712	0.00656	3.52523	-2.1098	0.209999	BM982457		MUC13
11728918_at	0.24717	0.00657	-3.52461	-2.1107	-0.206015	NM_145715.2		TIGD2
11731811_a_at	0.24744	0.00658	3.52342	-2.1124	0.260725	AF343659.1		FCRL4
11735628_at	0.24749	0.00659	3.52277	-2.1134	0.222421	NM_178548.3		TFAP2E
11724044_a_at	0.24749	0.0066	-3.52206	-2.1144	-0.203798	NM_004205.4		USP2
11726328_x_at	0.24749	0.0066	-3.52167	-2.115	-0.30351	NM_002053.2		GBP1
11752747_a_at	0.24749	0.0066	-3.52135	-2.1155	-0.224325	AK297418.1		MRS2
11748438_a_at	0.24754	0.00661	3.5206	-2.1166	0.225202	AK301168.1		FANCA
11725582_at	0.24754	0.00662	3.52024	-2.1171	0.208839	NM_014443.2		IL17B
11747159_a_at	0.24768	0.00663	3.51897	-2.1189	0.281431	AK303278.1		NGFR
11737403_at	0.24768	0.00663	3.5189	-2.119	0.216069	BC133036.1		TMEM89
11744670_at	0.24778	0.00664	3.51816	-2.1201	0.308841	AF280797.2		LINC00852
11745160_s_at	0.24818	0.00666	-3.51602	-2.1233	-0.265373	AF149098.1		TGFA
11749456_a_at	0.24818	0.00666	-3.51583	-2.1235	-0.237427	BC064700.1		ESRRG
11726157_at	0.24818	0.00666	-3.51567	-2.1238	-0.256841	BC112360.1		SPIN4
11722244_at	0.24899	0.00669	-3.51284	-2.1279	-0.224418	NM_020665.3		TMEM27
11763017_at	0.24899	0.0067	3.51229	-2.1287	0.275736	AK301276.1		HSPD1
11722982_a_at	0.24899	0.0067	-3.51215	-2.1289	-0.259339	NM_000081.2		LYST
11718326_at	0.24916	0.00671	3.51113	-2.1304	0.245514	NM_015691.3		WWC3
11747487_a_at	0.24916	0.00671	-3.51075	-2.131	-0.300854	AK294659.1		PPP2R2B
11741177_s_at	0.24925	0.00672	3.50972	-2.1325	0.254567	AF276292.1		KIR2DL4
11732889_at	0.24925	0.00673	3.50904	-2.1335	0.221723	BC137292.1		DEFB132
11761415_at	0.24925	0.00674	3.50808	-2.1349	0.206118	AK300273.1		CTHRC1
11747591_a_at	0.24925	0.00674	-3.50801	-2.135	-0.223506	AK304847.1		GLIPR1
11738777_at	0.24925	0.00675	3.50777	-2.1353	0.293048	NM_001145465.1		NANOGNB
11717805_a_at	0.24925	0.00675	-3.50764	-2.1355	-0.213938	AK291337.1		CASP3
11722357_a_at	0.24977	0.00677	-3.50533	-2.1389	-0.211462	AF251043.1		ACADM
11736592_x_at	0.24977	0.00677	-3.50499	-2.1394	-0.241236	NM_007078.2		LDB3
11746172_a_at	0.24977	0.00678	3.50489	-2.1396	0.194784	BC105742.1		KLHL17
11743100_a_at	0.25024	0.0068	3.50305	-2.1423	0.209968	AK290525.1		ENO2
11729849_a_at	0.25024	0.0068	-3.50233	-2.1433	-0.298171	U13948.1		MLLT10
11718410_at	0.25024	0.00681	3.50155	-2.1445	0.26713	NM_005208.4		CRYBA1
11722573_a_at	0.25024	0.00681	-3.50155	-2.1445	-0.285039	NM_022350.3		ERAP2
AFFX-LysX-M_at	0.25024	0.00682	-3.50048	-2.146	-0.286489			---	AFFX-LysX-M_at
11718862_at	0.25024	0.00682	-3.5003	-2.1463	-0.272234	NM_007214.4		SEC63
11758837_at	0.25024	0.00683	3.50009	-2.1466	0.314332	AK125727.1		LOC100506603
11747807_x_at	0.25024	0.00683	-3.49987	-2.1469	-0.348301	AB009022.1		RNGTT
11724094_a_at	0.25041	0.00684	-3.49895	-2.1483	-0.225799	AK294066.1		COL4A5
11755166_a_at	0.25047	0.00685	3.49834	-2.1492	0.191155	BM052652		ESAM
11739396_a_at	0.25052	0.00687	-3.49624	-2.1522	-0.316765	NM_001128174.1		UGT8
11741424_a_at	0.25052	0.00687	3.49622	-2.1523	0.286242	AK291800.1		CMKLR1
11745336_a_at	0.25052	0.00687	-3.49619	-2.1523	-0.246746	BC144537.1		DMXL1
11726355_at	0.25052	0.00687	-3.49564	-2.1531	-0.231174	BQ575899		ENPP1
11737735_a_at	0.25052	0.00688	3.49498	-2.1541	0.213572	AK299608.1		EFCAB5
11759471_x_at	0.25052	0.00688	3.49485	-2.1543	0.276761	NM_178354.1		LCE1F
11746108_a_at	0.25052	0.00689	3.49451	-2.1548	0.198284	AK299321.1		MPP2
11755590_a_at	0.25052	0.0069	3.49354	-2.1562	0.353284	AK026786.1		PRMT8
11757934_at	0.25052	0.0069	-3.49345	-2.1563	-0.281575	AI287267		KIAA1551
11724925_at	0.25052	0.00691	-3.49279	-2.1573	-0.30253	BC140790.1		LTN1
11742607_at	0.25052	0.00691	3.49245	-2.1578	0.218927	NM_001004059.2		OR4S2
11717116_at	0.25052	0.00693	-3.49065	-2.1604	-0.284059	NM_022766.5		CERK
11717305_a_at	0.25052	0.00693	-3.49055	-2.1606	-0.297386	BC004471.2		ADIRF
11733781_a_at	0.25052	0.00695	-3.48881	-2.1631	-0.246337	NM_021252.3		RAB18
11746237_x_at	0.25052	0.00695	-3.48879	-2.1632	-0.247942	BC095401.1		AKTIP
11718151_a_at	0.25052	0.00695	-3.48878	-2.1632	-0.255179	NM_003883.3		HDAC3
11746916_a_at	0.25052	0.00695	-3.48871	-2.1633	-0.208834	AK293018.1		SNX7
11743847_x_at	0.25052	0.00696	-3.48742	-2.1652	-0.35565	BU730835		CFH
11728837_a_at	0.25052	0.00697	3.48705	-2.1657	0.264919	NM_001040108.1		MLH3
11754636_a_at	0.25052	0.00698	-3.4863	-2.1668	-0.26495	AK128184.1		ZNF708
11736517_a_at	0.25052	0.00698	3.48625	-2.1669	0.241912	NM_007331.1		WHSC1
11763827_a_at	0.25052	0.00698	3.48545	-2.1681	0.203792	AK310884.1		MS4A8
11757946_s_at	0.25052	0.00699	-3.48485	-2.1689	-0.243821	DB549326		CPNE3
11724753_at	0.25052	0.00699	-3.48468	-2.1692	-0.280138	NM_007114.2		TMF1
11716015_a_at	0.25052	0.007	-3.48448	-2.1695	-0.312327	BC040227.1		CMTM3
AFFX-LysX-3_at	0.25052	0.007	-3.48434	-2.1697	-0.24026			---	AFFX-LysX-3_at
11720038_at	0.25052	0.007	-3.48384	-2.1704	-0.248906	AF060225.1		VTA1
11717575_at	0.25052	0.007	-3.48366	-2.1707	-0.280664	NM_005398.4		PPP1R3C
11729336_a_at	0.25052	0.00701	3.48335	-2.1712	0.223406	NM_001127501.1		ALPL
11759922_a_at	0.25052	0.00701	3.48324	-2.1713	0.342765	BC071566.1		PARD3
11760948_at	0.25052	0.00701	3.48308	-2.1715	0.261794	AK296204.1		ANAPC2
11753630_x_at	0.25052	0.00701	-3.48289	-2.1718	-0.288699	AF493887.1		ARL1
11746580_s_at	0.25052	0.00701	-3.48277	-2.172	-0.328206	BC022291.1		ZNF140
11748774_x_at	0.25092	0.00703	-3.48129	-2.1742	-0.328385	BC023504.2		CTSV
11755953_a_at	0.25092	0.00704	-3.48084	-2.1748	-0.279282	AK130018.1		DMRTA1
11755652_x_at	0.2512	0.00706	-3.47883	-2.1778	-0.210116	AK128603.1		MBLAC2
11754871_a_at	0.2512	0.00707	3.47794	-2.1791	0.301605	AF176071.1		TSPAN32
11743450_a_at	0.2512	0.00707	-3.47787	-2.1792	-0.378686	AK074882.1		ELOVL6
11763202_x_at	0.2512	0.00707	3.4777	-2.1795	0.382477	AK300138.1		FAM65B
11756106_a_at	0.2512	0.00707	-3.47736	-2.1799	-0.255757	AK091663.1		SETBP1
11736819_at	0.2512	0.00708	3.47713	-2.1803	0.293849	BC075036.2		RPE65
11740418_at	0.2512	0.00708	-3.47689	-2.1806	-0.246221	U17034.1		PLA2R1
11734735_a_at	0.2513	0.00709	-3.47619	-2.1817	-0.22169	BG910698		FAR1
11760871_x_at	0.25149	0.0071	3.47489	-2.1836	0.218942	AK299304.1		PMPCA
11741856_s_at	0.25149	0.0071	-3.47479	-2.1837	-0.331591	BC137089.1		ZNF658 /// ZNF658B
11753720_x_at	0.25182	0.00712	-3.47303	-2.1863	-0.22508	CR542113.1		GMFB
11727170_at	0.25182	0.00713	-3.47271	-2.1868	-0.240923	AK021511.1		TRPS1
11757643_x_at	0.25182	0.00714	3.47184	-2.1881	0.304867	DC427430		SERPINE2
11756605_x_at	0.25182	0.00714	-3.4714	-2.1887	-0.344954	BC098138.1		PCDHB2
11719510_at	0.25182	0.00715	-3.4707	-2.1897	-0.514282	NM_014877.3		HELZ
11726329_x_at	0.25182	0.00715	-3.47037	-2.1902	-0.303956	BC002666.2		GBP1
11720013_a_at	0.25182	0.00715	-3.47023	-2.1904	-0.367886	AI479273		ATM
11745605_a_at	0.25182	0.00715	3.47013	-2.1906	0.246696	AF238328.1		GNB1L
11755187_a_at	0.25182	0.00716	3.46985	-2.191	0.222303	BC144404.1		ERMP1
11720773_x_at	0.25191	0.00717	-3.46911	-2.1921	-0.223489	NM_145261.2		DNAJC19
11723566_a_at	0.25191	0.00717	-3.4687	-2.1927	-0.191009	AB028639.1		CAPN7
11757612_a_at	0.25205	0.00718	3.4679	-2.1938	0.220951	AI990291		ASRGL1
11748057_x_at	0.25235	0.0072	3.46627	-2.1963	0.269405	AK301687.1		SOX15
11745234_a_at	0.25235	0.00721	-3.46551	-2.1974	-0.261711	BX392990		HACD4
11760002_at	0.25235	0.00721	3.46541	-2.1975	0.296175	BC036250.1		RNF212
11739323_a_at	0.25235	0.00721	3.46534	-2.1976	0.258073	AK292923.1		WDR4
11739155_s_at	0.25243	0.00722	-3.46423	-2.1993	-0.358843	BG170135		FAM129A
11721293_x_at	0.25243	0.00722	-3.46407	-2.1995	-0.280144	AF124491.1		GIT2
11736348_a_at	0.25243	0.00724	-3.46272	-2.2015	-0.20945	BC117201.1		HFE
11742200_a_at	0.25243	0.00724	-3.46214	-2.2023	-0.224142	DQ023506.1		PREPL
11751231_a_at	0.25243	0.00725	3.46205	-2.2025	0.271203	AK297004.1		HAL
11761505_a_at	0.25243	0.00725	3.46179	-2.2028	0.338073	BC010099.2		USB1
11742335_at	0.25243	0.00725	3.46155	-2.2032	0.241021	BC140729.1		OR2D2
11734911_x_at	0.25243	0.00725	-3.46142	-2.2034	-0.211512	NM_024908.2		WDR76
11736326_at	0.25243	0.00726	-3.46108	-2.2039	-0.215766	BU677559		SWSAP1
11724059_a_at	0.25259	0.00727	3.45953	-2.2062	0.23596	BC151230.1		TECPR2
11751352_a_at	0.25259	0.00728	-3.45904	-2.2069	-0.20982	AK297449.1		HMG20A
11715166_at	0.25259	0.00728	-3.45879	-2.2072	-0.235552	NA	41406093	DNAJC12	NA
11738160_at	0.25259	0.00729	3.45845	-2.2077	0.241283	BC117484.1		NANOS2
11731637_s_at	0.25259	0.00729	3.45817	-2.2082	0.240739	NM_207123.2		GAB1
11738337_a_at	0.25259	0.00729	3.45778	-2.2087	0.26946	NM_207386.2		SHISA6
11752331_s_at	0.25259	0.0073	-3.4572	-2.2096	-0.210928	BC111011.1		LOC105369243 /// SLX1A-SULT1A3 /// SLX1B-SULT1A4 /// SULT1A3 /// SULT1A4
11727787_a_at	0.25259	0.0073	-3.45695	-2.2099	-0.217309	AW337940		CACYBP
11743958_at	0.25259	0.00731	-3.456	-2.2113	-0.234577	AK315670.1		SNX8
11734802_x_at	0.25259	0.00732	-3.45588	-2.2115	-0.4118	NM_020422.4		TMEM159
11749504_x_at	0.25259	0.00732	3.45539	-2.2122	0.21838	AK297459.1		RELN
11759987_x_at	0.25259	0.00733	-3.45488	-2.213	-0.226391	BC050654.1		LARP1B
11745722_x_at	0.25259	0.00733	3.45487	-2.213	0.225687	CR605478.1		FHL1
11725816_a_at	0.25263	0.00734	-3.45409	-2.2142	-0.346881	NM_001136052.1		CPT1C
11728469_a_at	0.25263	0.00734	3.45387	-2.2145	0.343978	NM_001018072.1		BTBD11
11751348_a_at	0.25276	0.00735	-3.45302	-2.2157	-0.205053	AK294839.1		NDFIP2
11722825_at	0.25276	0.00735	-3.45266	-2.2163	-0.192236	NM_022346.3		NCAPG
11751886_s_at	0.25321	0.00738	-3.45073	-2.2191	-0.247966	AF263744.1		ERBB2IP
11743152_a_at	0.25321	0.00738	-3.45046	-2.2195	-0.262337	U42349.1		TUSC3
11750127_a_at	0.25321	0.00739	-3.4498	-2.2205	-0.201514	AK295461.1		PHF14
11755624_a_at	0.25321	0.00739	-3.44957	-2.2208	-0.231545	AK125758.1		MTFR2
11741076_a_at	0.25321	0.00739	-3.44931	-2.2212	-0.319023	U13697.1		CASP1
11731665_a_at	0.25323	0.0074	3.44883	-2.2219	0.212369	BC077725.1		PDGFB
11758727_x_at	0.25391	0.00742	-3.44667	-2.2251	-0.242091	NM_001001973.1		ATP5C1
11758676_s_at	0.25399	0.00743	-3.44603	-2.226	-0.226648	R23125		RHOQ
11734326_a_at	0.25411	0.00744	3.44528	-2.2271	0.314343	AF016005.1		RERE
11755843_a_at	0.25422	0.00745	-3.44418	-2.2287	-0.287403	AK092353.1		PCNXL2
11759937_at	0.25422	0.00745	3.44413	-2.2288	0.197034	AY035381.1		LINC01547
11752633_a_at	0.25427	0.00747	3.44266	-2.231	0.243601	AK290478.1		OLFM1
11716716_x_at	0.25427	0.00747	-3.44254	-2.2312	-0.293971	NM_147782.2		CTSB
11717676_a_at	0.25427	0.00748	-3.44215	-2.2317	-0.293689	AF160973.1		CYFIP2
11725066_a_at	0.25427	0.00748	-3.44188	-2.2321	-0.191152	U23460.1		CAMK2B
11750463_a_at	0.25427	0.00748	3.44181	-2.2322	0.234126	AK298084.1		CLEC4M
11747086_a_at	0.25428	0.00749	-3.44135	-2.2329	-0.329328	AK295413.1		GCA
11723069_at	0.25444	0.0075	-3.44009	-2.2348	-0.339584	NM_006398.3		GABBR1 /// UBD
11727468_a_at	0.25444	0.0075	-3.43987	-2.2351	-0.200821	NM_002362.4		MAGEA4
11741650_a_at	0.25444	0.00751	-3.43964	-2.2354	-0.232409	AK299374.1		LRP12
11739586_a_at	0.25445	0.00752	-3.43877	-2.2367	-0.223755	AB019542.1		CLCN3
11727363_a_at	0.25445	0.00752	-3.43846	-2.2372	-0.230346	AK296786.1		SHC1
11736945_a_at	0.25445	0.00752	3.43832	-2.2374	0.215821	AK292228.1		HIPK4
11763280_s_at	0.25453	0.00753	3.43766	-2.2383	0.368202	AK128040.1		TMEM136
11734225_x_at	0.25484	0.00755	-3.43554	-2.2415	-0.228305	NM_001112720.1		LIMCH1
11763957_at	0.25484	0.00755	3.43548	-2.2416	0.20444	NR_002999.2		SCARNA20
11733591_a_at	0.25484	0.00756	3.43462	-2.2428	0.21568	NM_001134233.1		C1orf204
11750238_a_at	0.25484	0.00757	3.43455	-2.2429	0.202149	AK302038.1		SARM1
11732947_a_at	0.25484	0.00757	-3.43448	-2.243	-0.265474	NM_015979.2		MED23
11747286_a_at	0.25484	0.00757	-3.43428	-2.2433	-0.212038	AK300123.1		SLC25A46
11741430_a_at	0.25502	0.00758	3.43341	-2.2446	0.242191	AK291465.1		KCTD15
11722843_a_at	0.25529	0.0076	3.43194	-2.2468	0.303523	NM_001008493.1		ENAH
11727293_x_at	0.25529	0.0076	-3.43187	-2.2469	-0.308809	NM_001013620.3		ALG10B
11725962_a_at	0.25543	0.00761	3.43096	-2.2482	0.220006	AI760155		TCHH
11745069_a_at	0.25543	0.00762	-3.42993	-2.2497	-0.345282	BC047475.1		TRAPPC13
11741229_a_at	0.25543	0.00762	-3.42969	-2.2501	-0.249885	AK291453.1		FAM111A
11762511_a_at	0.25543	0.00763	3.42955	-2.2503	0.255578	AY358740.1		IL31RA
11762313_x_at	0.25543	0.00763	3.42935	-2.2506	0.19752	AK299834.1		ECHDC2
11742515_at	0.25544	0.00763	3.42889	-2.2513	0.192059	NM_001004759.1		OR51T1
11717554_at	0.25592	0.00767	-3.42586	-2.2557	-0.293231	AF448510.1		SETD7
11737038_at	0.25592	0.00768	3.42491	-2.2571	0.202968	NM_001136482.1		C19orf38
11742392_s_at	0.25592	0.00769	3.42457	-2.2576	0.217878	NM_001005235.1		OR1L4 /// OR1L6
11761008_a_at	0.25592	0.0077	3.42361	-2.2591	0.278888	AK316311.1		TASP1
11739564_s_at	0.25592	0.0077	-3.42294	-2.26	-0.300403	BM992183		ITPR1
11747280_x_at	0.25592	0.00771	-3.42278	-2.2603	-0.246415	CD014129		DHFR
11742817_a_at	0.25592	0.00771	-3.42273	-2.2604	-0.232633	AK298923.1		RNF214
11760982_at	0.25592	0.00771	3.42264	-2.2605	0.243483	AK290485.1		CDK10
11716653_x_at	0.25592	0.00771	-3.42243	-2.2608	-0.252273	BC140845.1		EML4
11728808_at	0.25592	0.00771	-3.42213	-2.2612	-0.349453	NM_001008708.2		CHAC2
11724674_a_at	0.25592	0.00772	-3.42172	-2.2618	-0.240477	NM_173348.1		FAM149B1
11731252_a_at	0.25592	0.00772	-3.42171	-2.2619	-0.224658	NM_001128592.1		PSMG4
11744935_a_at	0.25592	0.00772	3.42168	-2.2619	0.237468	AY358114.1		LINGO2
11747416_a_at	0.25592	0.00773	3.42121	-2.2626	0.228251	AK292470.1		FGFR1
11717936_a_at	0.25592	0.00773	3.42079	-2.2632	0.260482	CA453680		ERMP1
11740060_at	0.25592	0.00773	3.4205	-2.2636	0.196775	BC111791.1		FABP2
11763293_at	0.25592	0.00774	-3.42042	-2.2638	-0.344461	CA423791		ZSCAN9
11735305_a_at	0.25612	0.00775	3.4191	-2.2657	0.209452	NM_144606.5		FLCN
11723473_a_at	0.25612	0.00775	-3.41908	-2.2657	-0.238027	BC016711.1		LYPLAL1
11737690_a_at	0.25632	0.00776	3.41815	-2.2671	0.221421	NM_001110354.1		ZP3
11724601_s_at	0.25641	0.00778	-3.41692	-2.2689	-0.223044	NM_001040458.1		ERAP1
11759734_at	0.25641	0.00778	-3.41656	-2.2695	-0.295779	AF288161.1		BLZF1
11761970_at	0.25641	0.00779	3.41628	-2.2699	0.249396	BC071576.1		ALS2
11751470_a_at	0.25641	0.00779	3.41613	-2.2701	0.273832	AK296132.1		PLEKHS1
11748060_a_at	0.25641	0.00779	3.41581	-2.2706	0.216514	AK293037.1		ADAMTSL4
11758726_at	0.25648	0.0078	-3.41477	-2.2721	-0.209748	NM_001001973.1		ATP5C1
11745756_a_at	0.25648	0.00781	-3.41458	-2.2724	-0.205555	AK303339.1		TMEM41B
11721642_x_at	0.25648	0.00782	-3.41385	-2.2734	-0.198353	U02390.1		CAP2
11728975_at	0.25648	0.00783	3.41294	-2.2748	0.331802	AK304550.1		ZNF792
11753516_a_at	0.25648	0.00783	-3.41289	-2.2749	-0.202941	AY360463.1		NADK2
11718448_at	0.25648	0.00783	3.41248	-2.2755	0.224055	NM_031469.2		SH3BGRL2
11716569_at	0.25648	0.00783	3.4124	-2.2756	0.308251	NM_000435.2		NOTCH3
11762885_at	0.25648	0.00784	3.41151	-2.2769	0.28562	AF274942.1		---
11759103_at	0.25648	0.00785	3.41123	-2.2773	0.314017	AB002454.1		CYP4F3
11744102_a_at	0.25648	0.00785	3.41104	-2.2776	0.258145	CO248356		ARSE
11749344_a_at	0.25648	0.00787	3.40936	-2.2801	0.3651	AY358093.1		DHRS3
11725779_a_at	0.25648	0.00787	3.40934	-2.2801	0.20963	AI912173		CADPS
11718397_s_at	0.25648	0.00787	3.40925	-2.2802	0.448009	AW008290		JUN
11750938_x_at	0.25648	0.00788	3.40897	-2.2807	0.250289	AK302301.1		HIPK4
11740137_s_at	0.25648	0.00788	-3.40865	-2.2811	-0.275289	NM_018349.3		MCTP2
11734188_x_at	0.25648	0.00788	3.40865	-2.2811	0.227575	NM_001083899.1		GP6
11750836_a_at	0.25648	0.00788	-3.40847	-2.2814	-0.21443	AK295064.1		EFHC1
11761241_at	0.25667	0.0079	3.40738	-2.283	0.292055	AK301599.1		MAGED2
11760513_a_at	0.25667	0.0079	3.40717	-2.2833	0.232113	AK295973.1		PRMT1
11731197_a_at	0.25694	0.00791	-3.40608	-2.2849	-0.306517	NM_024841.3		PRR5L
11728832_at	0.25712	0.00792	3.40522	-2.2862	0.225375	M76482.1		DSG3
11760030_x_at	0.25729	0.00794	3.40351	-2.2887	0.243178	BC121185.1		WDR90
11717604_a_at	0.25729	0.00795	-3.40327	-2.2891	-0.208253	NM_016213.3		TRIP4
11747872_a_at	0.25729	0.00795	3.40315	-2.2893	0.235615	AK302888.1		DSG1
11742813_at	0.25729	0.00795	3.40278	-2.2898	0.198642	CX867460		SEMA6A
11733129_a_at	0.25729	0.00795	-3.40273	-2.2899	-0.308187	BU742894		ZSCAN26
11731112_at	0.25731	0.00796	3.40227	-2.2906	0.194238	NM_018960.4		GNMT
11716006_a_at	0.25751	0.00798	3.40095	-2.2925	0.239033	DQ350134.1		HYOU1
11719836_x_at	0.25751	0.00798	-3.40042	-2.2933	-0.24411	AF342816.1		LGALS8
11761232_at	0.25751	0.008	3.39925	-2.295	0.21916	AK303020.1		TRMU
11723177_at	0.25751	0.00801	3.39851	-2.2961	0.296834	NM_025074.5		FRAS1
11726112_at	0.25751	0.00802	-3.39782	-2.2971	-0.245847	NM_032230.1		METTL25
11760176_at	0.25751	0.00802	3.3978	-2.2971	0.198486	AF230401.1		PML
11724723_a_at	0.25751	0.00802	-3.39775	-2.2972	-0.199238	NM_021979.3		HSPA2
11759578_s_at	0.25751	0.00802	-3.39717	-2.2981	-0.245642	AY665468.1		RASSF8
11728017_a_at	0.25751	0.00804	-3.39593	-2.2999	-0.280935	CA432432		RHPN1
11748928_x_at	0.25751	0.00804	-3.39578	-2.3001	-0.251067	BC001158.1		PAFAH2
11751862_a_at	0.25751	0.00804	3.39557	-2.3004	0.282564	BC113093.1		KDM1B
11764123_at	0.25751	0.00805	3.39488	-2.3015	0.248056	BX103739		---
11740603_a_at	0.25751	0.00805	-3.39487	-2.3015	-0.402262	AB189172.1		APH1B
11751935_a_at	0.25751	0.00805	-3.39472	-2.3017	-0.266069	AK299306.1		EGF
11732031_at	0.25751	0.00806	3.39467	-2.3018	0.248776	NM_148961.3		OTOS
11727488_s_at	0.25751	0.00807	-3.39376	-2.3031	-0.360315	AF533709.1		HAUS6
11735334_a_at	0.25751	0.00807	3.39347	-2.3035	0.27677	NM_007232.2		HRH3
11753470_a_at	0.25751	0.00808	-3.39305	-2.3042	-0.207298	BC015944.1		TIA1
11726154_s_at	0.25751	0.00808	3.39276	-2.3046	0.182836	BC039396.1		FAM19A5
11726174_at	0.25751	0.00808	3.39257	-2.3049	0.232896	NM_001030060.1		SAMD5
11762911_x_at	0.25751	0.00809	3.39205	-2.3057	0.259787	L00693.1		CEACAM3
11748683_x_at	0.25751	0.0081	3.39155	-2.3064	0.250474	AK297990.1		NXN
11758206_s_at	0.25751	0.0081	3.39123	-2.3069	0.224601	DA541413		WASF2
11751877_at	0.25751	0.0081	-3.39123	-2.3069	-0.269424	AF085243.1		ZNF236
11721357_at	0.25751	0.0081	-3.39109	-2.3071	-0.231444	NM_021077.3		NMB
11736944_at	0.25751	0.0081	-3.39106	-2.3071	-0.280826	NM_144706.2		C2orf15
11761683_x_at	0.25785	0.00812	3.38981	-2.309	0.279893	BC020822.1		PYHIN1
11753326_a_at	0.25831	0.00814	3.38817	-2.3114	0.213682	AK304154.1		GPR157
11741937_at	0.25831	0.00814	3.38788	-2.3118	0.266615	AB126080.1		KRTAP5-11
11758598_s_at	0.25831	0.00815	3.38747	-2.3124	0.229838	AA947989		SERPINE2
11726867_a_at	0.25839	0.00816	-3.38685	-2.3133	-0.194812	NM_000082.3		ERCC8
11731018_at	0.25855	0.00818	3.38516	-2.3158	0.251122	NM_007374.2		SIX6
11755079_a_at	0.25855	0.00819	3.3839	-2.3177	0.234742	AK093343.1		ZC3H12A
11761663_a_at	0.25855	0.00819	3.38386	-2.3178	0.231928	AK295855.1		CCDC191
11757585_x_at	0.25855	0.0082	-3.38375	-2.3179	-0.199172	BG211353		MAGED1
11725411_at	0.25855	0.00821	3.38258	-2.3197	0.262089	CA424031		NAV1
11748151_at	0.25855	0.00821	3.38253	-2.3197	0.244418	AK294171.1		LOC653712
11748989_s_at	0.25855	0.00821	3.38251	-2.3198	0.297538	AK297745.1		TMEM35
11756806_a_at	0.25855	0.00821	-3.38239	-2.3199	-0.259614	CR625782.1		ISG20
11756029_a_at	0.25855	0.00821	-3.38231	-2.3201	-0.218613	AL359339.1		ASCC1
11727631_s_at	0.25855	0.00822	3.38189	-2.3207	0.241079	BC082986.1		APBA2
11754285_a_at	0.25855	0.00822	3.38161	-2.3211	0.244697	BU784885		TTR
11741824_x_at	0.25855	0.00823	-3.38113	-2.3218	-0.19151	NM_001034191.1		PPA2
11731781_x_at	0.25855	0.00823	3.381	-2.322	0.235478	NM_000847.4		GSTA3
11716760_x_at	0.25855	0.00823	-3.38078	-2.3223	-0.200412	NM_001225.3		CASP4
11751178_a_at	0.25874	0.00826	-3.3784	-2.3258	-0.201262	AK295150.1		ATP6V1A
11732223_x_at	0.25874	0.00827	3.37774	-2.3268	0.192222	NM_007155.5		ZP3
11746755_s_at	0.25874	0.00827	3.37771	-2.3269	0.238847	AK304406.1		SLC28A3
11764032_at	0.25874	0.00828	-3.37747	-2.3272	-0.21459	H99290		---
11743863_a_at	0.25874	0.00829	-3.3766	-2.3285	-0.258693	AW873040		ATP2B1
11755042_s_at	0.25874	0.00829	3.37642	-2.3288	0.289012	BC006441.1		RRN3P1
11719608_a_at	0.25874	0.00829	-3.37641	-2.3288	-0.235936	NM_003567.2		BCAR3
11759030_a_at	0.25874	0.00829	3.37624	-2.329	0.256649	D31771.1		MSX2
11719377_x_at	0.25874	0.0083	-3.37579	-2.3297	-0.214872	BC013963.2		CAP1
11729271_a_at	0.25874	0.0083	3.37557	-2.33	0.253521	BC014528.2		ASB1
11750330_a_at	0.25874	0.00831	3.37511	-2.3307	0.246424	AY764180.1		MYOCD
11726405_a_at	0.25874	0.00831	3.37489	-2.331	0.216405	NM_000049.2		ASPA
11726734_a_at	0.25874	0.00831	-3.37484	-2.3311	-0.203555	AW958102		TLK2
11730625_at	0.25874	0.00832	3.37432	-2.3319	0.27669	AB079373.1		KLB
11740828_at	0.25874	0.00832	3.37423	-2.332	0.319574	NM_003519.3		HIST1H2BL
11724994_at	0.25874	0.00834	3.37297	-2.3339	0.217723	BC031341.1		FAM101B
11726929_a_at	0.25874	0.00834	3.3723	-2.3349	0.235829	AF516695.1		CACNA2D4
11751312_a_at	0.25874	0.00835	3.37218	-2.335	0.316329	AK294491.1		BAIAP3
11751671_a_at	0.25874	0.00835	-3.37213	-2.3351	-0.213699	AK296061.1		LGALS8
11744162_a_at	0.25874	0.00835	3.37199	-2.3353	0.275359	DB361302		DUSP4
11726589_s_at	0.25874	0.00835	-3.37191	-2.3354	-0.188452	BC143881.1		NPTN
11752087_s_at	0.25878	0.00836	-3.37143	-2.3361	-0.247005	BC115398.1		TEAD1
11763452_at	0.25883	0.00838	3.3693	-2.3393	0.233142	BX537862.1		DPH6
11730017_at	0.25883	0.00839	3.36914	-2.3395	0.258976	NM_001099439.1		EPHA10
11719209_x_at	0.25883	0.0084	-3.36823	-2.3409	-0.211998	AK297184.1		NPTN
11745747_x_at	0.25883	0.0084	-3.36793	-2.3413	-0.210753	AK303690.1		AHCYL1
11746475_a_at	0.25883	0.00841	3.36773	-2.3416	0.201201	AK304120.1		MFSD4
11739326_a_at	0.25883	0.00841	-3.36767	-2.3417	-0.372654	M25393.1		PTPN2
11762374_at	0.25883	0.00841	-3.36746	-2.342	-0.381531	BC036669.2		COL25A1
11723456_x_at	0.25883	0.00841	3.3672	-2.3424	0.21453	NM_153370.2		PI16
11747983_a_at	0.25883	0.00842	-3.36673	-2.3431	-0.236854	AY358546.1		ICE2
11741021_x_at	0.25883	0.00842	3.36628	-2.3438	0.289742	U17040.1		KLK3
11734834_s_at	0.25883	0.00843	-3.36618	-2.3439	-0.284873	BC010350.1		TAF9B
11717344_x_at	0.25883	0.00843	3.36618	-2.3439	0.248476	AK292720.1		FOSB
11722546_a_at	0.25883	0.00843	-3.36613	-2.344	-0.236067	NM_024308.3		DHRS11
11741998_s_at	0.25883	0.00843	3.36576	-2.3445	0.225887	BC136939.1		OR5L1 /// OR5L2
11735236_x_at	0.2589	0.00844	-3.3652	-2.3454	-0.200173	NM_152238.2		SNX7
11745713_a_at	0.25936	0.00846	-3.36345	-2.348	-0.229656	BC104451.1		CDCA2
11741922_at	0.25936	0.00846	3.36329	-2.3482	0.221777	NM_178429.2		LCE2C
11748065_a_at	0.25972	0.00848	-3.36202	-2.3501	-0.371696	AK301971.1		LRRC49
11740461_a_at	0.25985	0.00849	-3.36132	-2.3511	-0.191913	NM_007348.2		ATF6
11746994_x_at	0.26002	0.00851	3.35986	-2.3533	0.218962	AK296656.1		PRSS8
11727354_x_at	0.26002	0.00852	3.3592	-2.3543	0.303693	AK094469.1		CALN1
11760991_a_at	0.26002	0.00852	3.35892	-2.3547	0.261281	AK293961.1		CKMT1A /// CKMT1B
11723464_s_at	0.26002	0.00852	3.35884	-2.3548	0.228845	AW969146		CELF2
11735457_at	0.26002	0.00852	3.35877	-2.3549	0.270754	NM_198988.1		LENG9
11728776_s_at	0.26002	0.00853	3.35855	-2.3552	0.214893	NM_001017535.1		VDR
11746618_a_at	0.26005	0.00853	-3.35809	-2.3559	-0.319642	U82396.1		RASSF8
11751295_a_at	0.26027	0.00855	-3.35669	-2.358	-0.213106	AK298661.1		HARS2
11720267_a_at	0.26027	0.00856	3.3563	-2.3586	0.19396	NM_201523.1		KLC4
11734359_a_at	0.26027	0.00857	-3.35547	-2.3598	-0.350991	NM_021133.2		RNASEL
11762739_at	0.26027	0.00857	3.35547	-2.3598	0.246693	AK304052.1		PSTPIP1
11734296_a_at	0.26027	0.00857	3.35546	-2.3598	0.194102	AK289617.1		P2RY14
11759214_s_at	0.26027	0.00858	-3.355	-2.3605	-0.466567	NM_198557.2		RBM43
11725040_at	0.26027	0.00858	-3.35478	-2.3608	-0.49413	NM_002006.4		FGF2
11756946_x_at	0.26027	0.00858	3.35444	-2.3613	0.189229	BC047319.1		TBC1D10C
11734825_at	0.26028	0.00859	-3.35386	-2.3622	-0.227087	AK091222.1		SPRED1
11726640_x_at	0.26028	0.0086	-3.35338	-2.3629	-0.285148	NM_020774.2		MIB1
11721100_a_at	0.26028	0.0086	3.35325	-2.3631	0.274672	AK291257.1		SGSH
11727601_a_at	0.26053	0.00861	3.35225	-2.3646	0.217286	NM_021197.2		WFDC1
11715713_a_at	0.26124	0.00865	3.34981	-2.3682	0.192343	AK315882.1		VOPP1
11758499_s_at	0.26124	0.00865	-3.34975	-2.3683	-0.189629	AI800576		DTL
11762284_at	0.26148	0.00866	3.34847	-2.3702	0.224474	AK302291.1		SSX8
11750609_a_at	0.26148	0.00867	-3.34785	-2.3711	-0.327338	U61166.1		ITSN1
11725127_at	0.26148	0.00867	-3.34777	-2.3712	-0.241066	U01877.1		EP300
11749867_x_at	0.26148	0.00868	-3.34735	-2.3718	-0.198106	AK293146.1		DHFR
11720217_a_at	0.26148	0.00868	3.34717	-2.3721	0.212339	NM_018487.2		TMEM176A
11758622_s_at	0.26148	0.00869	3.34675	-2.3727	0.212028	AA702306		MXRA7
11762285_x_at	0.26148	0.00869	3.34647	-2.3731	0.224228	AK302291.1		SSX8
11744738_a_at	0.26169	0.00871	-3.34552	-2.3745	-0.209727	BC015382.2		LOC145783 /// ZNF280D
11762050_x_at	0.26169	0.00871	3.34499	-2.3753	0.259047	BC053664.1		ZFYVE28
11754520_a_at	0.26169	0.00871	-3.34482	-2.3756	-0.247424	BC032426.1		MBNL2
11729261_a_at	0.26172	0.00872	-3.34436	-2.3763	-0.20625	BC132778.1		ZNF644
11745469_a_at	0.26194	0.00874	3.34306	-2.3782	0.280383	BC110918.1		INPP4B
11718434_a_at	0.26194	0.00874	3.34303	-2.3782	0.218849	AK290029.1		NPNT
11726087_at	0.26194	0.00875	-3.34246	-2.3791	-0.304767	NM_006308.1		HSPB3
11753612_x_at	0.26194	0.00875	3.34228	-2.3793	0.21446	AY438268.1		DFFB
11762259_x_at	0.26233	0.00877	-3.3409	-2.3814	-0.346964	AK302054.1		HLA-G
11735013_a_at	0.26233	0.00878	3.34031	-2.3823	0.196539	NM_020155.2		GPR137
11739925_x_at	0.26233	0.00878	3.34014	-2.3825	0.184746	AK130521.1		ZNF37A
11717863_a_at	0.26233	0.00879	3.33951	-2.3835	0.494881	NM_004419.3		DUSP5
11723746_a_at	0.26233	0.00879	3.33943	-2.3836	0.216309	NM_177550.3		SLC13A5
11745123_a_at	0.26254	0.0088	3.33855	-2.3849	0.252496	AY358778.1		TMEM198B
11763339_a_at	0.26259	0.00882	3.33709	-2.387	0.187661	AK128704.1		SIVA1
11726220_at	0.26259	0.00882	3.33689	-2.3873	0.221801	NM_001040709.1		SYPL2
11761543_a_at	0.26259	0.00883	3.33677	-2.3875	0.235672	AK296328.1		CDK20
11742535_x_at	0.26259	0.00884	3.33591	-2.3888	0.282666	NM_001105517.1		FAM58BP
11730442_s_at	0.26259	0.00884	-3.33583	-2.3889	-0.318232	NM_001080396.2		FAM155A
11719547_at	0.26259	0.00885	-3.33489	-2.3903	-0.274505	U51587.1		GOLGA1
11751072_a_at	0.26259	0.00885	3.3348	-2.3904	0.222266	AK295536.1		SPATA2
11731430_a_at	0.26259	0.00886	3.3345	-2.3909	0.20594	NM_000784.3		CYP27A1
11741774_a_at	0.26259	0.00886	3.33431	-2.3912	0.243092	AK293478.1		PPP1R17
11730694_at	0.26259	0.00886	3.33427	-2.3912	0.240686	NM_198568.2		GJB7
11721790_s_at	0.26259	0.00886	3.33417	-2.3914	0.205237	NM_002839.2		PTPRD
11744708_a_at	0.26259	0.00887	-3.33387	-2.3918	-0.314128	BC017039.1		LYRM1
11735160_at	0.26273	0.00888	3.33305	-2.393	0.211255	BC099634.1		KCNAB3
11732578_x_at	0.26273	0.00889	-3.33237	-2.3941	-0.240545	NM_001001414.1		NCCRP1
11762249_a_at	0.26273	0.00889	-3.33209	-2.3945	-0.206899	AK301662.1		RPF2
11720963_a_at	0.26273	0.0089	-3.33182	-2.3949	-0.265722	BC114617.1		DCK
11736333_at	0.26273	0.0089	-3.33164	-2.3951	-0.219775	CA309329		PHF20
11734833_s_at	0.26288	0.00891	-3.33073	-2.3965	-0.185343	NM_015975.4		TAF9B
11722224_at	0.26288	0.00892	3.33027	-2.3972	0.247369	NM_000906.3		NPR1
11726090_at	0.26288	0.00892	3.33014	-2.3974	0.187912	BQ008507		VPS53
11744150_s_at	0.26297	0.00893	-3.32937	-2.3985	-0.33798	BC152448.1		LPIN2
11747473_a_at	0.26297	0.00893	-3.32918	-2.3988	-0.277787	BC002630.2		ITGB8
11719919_a_at	0.26312	0.00895	-3.32801	-2.4005	-0.192887	BC011014.1		TIMM10B
11756186_s_at	0.26312	0.00895	3.32768	-2.401	0.185742	BM678286		LOC100233156 /// LOC105379554 /// MAFIP /// TEKT4P2
11722219_at	0.26312	0.00896	-3.32732	-2.4015	-0.225785	NM_007187.3		WBP4
11748805_a_at	0.26312	0.00896	3.32731	-2.4016	0.210942	AK297612.1		SLC13A5
11730301_a_at	0.26344	0.00898	-3.32616	-2.4033	-0.281649	BC023635.2		LIAS
11730859_a_at	0.26372	0.00899	3.32499	-2.405	0.251283	BC113425.1		SLC6A7
11735477_a_at	0.26372	0.009	3.32452	-2.4057	0.206539	BC074834.2		CHST6
11725032_a_at	0.26372	0.009	3.32438	-2.4059	0.222012	AK295801.1		TPP1
11739838_a_at	0.26405	0.00902	3.32322	-2.4076	0.196506	NM_001042603.1		KDM5A
11717994_a_at	0.26409	0.00903	3.32273	-2.4084	0.427433	NM_002135.3		NR4A1
11748638_a_at	0.26418	0.00904	-3.32173	-2.4099	-0.216435	AK295870.1		BTRC
11742388_at	0.26418	0.00904	3.32152	-2.4102	0.247311	NM_001005492.1		OR5J2
11740414_a_at	0.26418	0.00905	3.32117	-2.4107	0.293299	M99435.1		TLE1
11761070_at	0.26418	0.00905	3.32075	-2.4113	0.212977	AK301440.1		MRPL20
11752060_x_at	0.26418	0.00906	3.32043	-2.4118	0.238918	EF560720.1		ERN2
11737536_a_at	0.26418	0.00906	-3.32029	-2.412	-0.214277	BC124554.1		SAMD12
11715999_a_at	0.26437	0.00907	-3.31946	-2.4132	-0.261725	AK292382.1		CAB39
11739508_a_at	0.26454	0.00909	-3.31804	-2.4153	-0.219752	AK024885.1		NAA30
11716652_a_at	0.26454	0.00909	-3.31802	-2.4154	-0.279574	BC140845.1		EML4
11737622_a_at	0.26454	0.0091	3.31753	-2.4161	0.2439	BC006252.2		SLC6A6
11756248_a_at	0.26454	0.00911	-3.31715	-2.4166	-0.21032	BC040324.1		PDPK1
11719048_a_at	0.26454	0.00911	3.31697	-2.4169	0.231102	NM_003915.4		CPNE1
11751740_a_at	0.26454	0.00912	-3.31615	-2.4181	-0.309619	AK295327.1		ACER3
11761610_a_at	0.26454	0.00912	3.31587	-2.4186	0.221239	AK303139.1		DDX11
11741274_a_at	0.26454	0.00913	3.31561	-2.4189	0.334387	AK292999.1		KCNAB1
11727541_a_at	0.26454	0.00913	-3.31513	-2.4197	-0.241715	NM_003829.3		MPDZ
11730435_at	0.26454	0.00914	3.31504	-2.4198	0.234283	BC021715.1		SRSF12
11724864_a_at	0.26454	0.00914	3.31448	-2.4206	0.273215	NM_000166.5		GJB1
11746780_a_at	0.26454	0.00916	3.31368	-2.4218	0.223374	BC058835.1		RASSF6
11716906_a_at	0.26454	0.00917	-3.3128	-2.4231	-0.245226	NM_004360.3		CDH1
11717534_a_at	0.26454	0.00917	3.3126	-2.4234	0.196655	CK823509		TMEM259
11754914_x_at	0.26454	0.00918	3.31192	-2.4244	0.215274	AK075474.1		PGAP3
11721052_at	0.26454	0.00919	-3.31152	-2.425	-0.28281	NM_020782.1		KLHL42
11753192_a_at	0.26454	0.00919	3.31142	-2.4252	0.206758	D86586.1		CLEC11A
11735777_at	0.26454	0.00919	3.31107	-2.4257	0.264003	BC144548.1		SPDYC
11740287_a_at	0.26454	0.0092	-3.31084	-2.426	-0.286128	NM_001135176.1		NEDD1
11716299_a_at	0.26454	0.0092	-3.31045	-2.4266	-0.285168	BC136442.1		ITGAV
11751682_a_at	0.26454	0.00921	3.31024	-2.4269	0.267155	AK297660.1		RNASEH2C
11734890_a_at	0.26454	0.00921	3.31016	-2.427	0.277515	BC105602.1		IL32
11724787_s_at	0.26454	0.00921	-3.30966	-2.4278	-0.234123	NM_007054.5		KIF3A
11752262_a_at	0.26454	0.00921	3.30966	-2.4278	0.235033	AK291596.1		MNT
11755035_x_at	0.26454	0.00922	-3.30897	-2.4288	-0.310895	AK074721.1		MPDZ
11750950_a_at	0.26454	0.00923	3.30876	-2.4291	0.256578	AK294585.1		CACNA1D
11721238_s_at	0.26454	0.00923	-3.30853	-2.4295	-0.25971	NM_006476.4		ATP5L
11738327_a_at	0.26454	0.00924	-3.30783	-2.4305	-0.198544	AF523356.1		HNMT
11729280_a_at	0.26454	0.00924	-3.30769	-2.4307	-0.263323	NM_139076.2		FAM175A
11741541_a_at	0.26454	0.00924	-3.30766	-2.4308	-0.291044	BC041063.1		EYA4
11726631_at	0.26454	0.00924	3.3076	-2.4308	0.21908	AI925572		TRIM8
11739466_a_at	0.265	0.00927	-3.30616	-2.433	-0.206973	AF220192.1		ECHDC1
11728689_at	0.2651	0.00928	-3.30524	-2.4344	-0.293447	NM_002871.3		RABIF
11752956_a_at	0.2651	0.00929	-3.30434	-2.4357	-0.19043	BC131721.1		C5orf51
11721055_x_at	0.2651	0.0093	3.30404	-2.4361	0.26279	BC041073.1		PRKX
11744630_a_at	0.2651	0.00931	-3.30329	-2.4373	-0.219973	AY358207.1		NXPE3
11763086_at	0.2651	0.00931	-3.30324	-2.4373	-0.321067	DQ323997.1		C5orf17 /// LOC105374689
11763276_a_at	0.2651	0.00931	-3.30291	-2.4378	-0.204146	CB050082		PWP1
11721239_x_at	0.2651	0.00932	-3.30252	-2.4384	-0.202967	NM_006476.4		ATP5L
11718180_s_at	0.2651	0.00932	-3.30228	-2.4388	-0.183589	BC017327.2		FERMT2
11737080_at	0.2651	0.00933	-3.30195	-2.4393	-0.257869	NM_001145026.1		PTPRQ
11730791_at	0.2651	0.00934	-3.30142	-2.44	-0.194055	CD676052		SVIP
11724832_at	0.2651	0.00934	-3.30137	-2.4401	-0.196747	NM_000351.4		STS
11731201_at	0.2651	0.00934	3.30136	-2.4401	0.289054	NM_018086.2		FIGN
11744412_a_at	0.2651	0.00934	-3.30119	-2.4404	-0.189446	BC036841.1		TMEM131
11720389_a_at	0.26527	0.00935	3.30042	-2.4415	0.282993	BX105256		PTPN23
11748067_a_at	0.2655	0.00936	-3.29951	-2.4429	-0.411996	AK292795.1		CCPG1 /// DYX1C1-CCPG1
11743732_a_at	0.26595	0.00938	-3.29808	-2.445	-0.188227	BQ015151		RCAN1
11719114_a_at	0.26626	0.0094	-3.29698	-2.4466	-0.199595	AK291759.1		PJA2
11745369_x_at	0.26676	0.00943	3.29495	-2.4497	0.211121	BC030621.2		ZFYVE27
11732004_a_at	0.26676	0.00943	-3.29492	-2.4497	-0.27774	NM_001012969.2		ADAL
11750226_a_at	0.26676	0.00943	3.29473	-2.45	0.247199	AK299430.1		ADCK1
11747661_x_at	0.2668	0.00944	3.29415	-2.4509	0.240369	AK295452.1		DMTN
11721126_a_at	0.2668	0.00945	-3.2939	-2.4512	-0.289267	L14721.1		ENPEP
11730768_x_at	0.2668	0.00945	3.29355	-2.4517	0.231436	NM_153703.3		PODN
11735586_x_at	0.26685	0.00947	3.2926	-2.4532	0.201615	NM_007153.2		ZNF208
11760437_at	0.26685	0.00947	3.29238	-2.4535	0.216213	AK302809.1		DNPEP
11732433_s_at	0.26685	0.00947	-3.29215	-2.4538	-0.281946	BU623972		GK
11737064_a_at	0.26685	0.00948	-3.29198	-2.4541	-0.27511	BC027593.1		MTL5
11729913_a_at	0.26723	0.00949	3.29074	-2.4559	0.255682	AK303837.1		IBA57
11751923_a_at	0.2674	0.00951	-3.28998	-2.4571	-0.338899	AK304693.1		ERBB2IP
11720317_a_at	0.26741	0.00952	-3.28926	-2.4581	-0.247657	NM_001344.2		DAD1
11738049_a_at	0.26741	0.00952	3.28923	-2.4582	0.231733	AK300526.1		ATP2C2
11730905_a_at	0.26783	0.00955	-3.28734	-2.461	-0.25543	AB023196.2		PDS5B
11735320_a_at	0.26783	0.00955	-3.28728	-2.4611	-0.407337	NM_001003793.1		RBMS3
11734862_a_at	0.26783	0.00955	-3.28713	-2.4613	-0.186289	AK291694.1		TMLHE
11731660_a_at	0.26783	0.00955	3.28681	-2.4618	0.212283	NM_144992.4		VWA3B
11726618_a_at	0.26791	0.00957	-3.28597	-2.463	-0.198995	BC050441.1		C1GALT1C1
11746109_a_at	0.26791	0.00957	3.2859	-2.4631	0.210955	CR936598.1		MPP2
AFFX-r2-Bs-lys-5_at	0.26823	0.00958	-3.28479	-2.4648	-0.380441			---	AFFX-r2-Bs-lys-5_at
11756191_a_at	0.26827	0.00959	3.28436	-2.4654	0.184612	N30588		MAN1C1
11745308_at	0.26829	0.0096	3.28395	-2.466	0.221652	BC107117.2		EPB41L4A-AS2
11720344_s_at	0.26835	0.00961	3.28337	-2.4669	0.197013	NM_003363.3		C3orf62 /// USP4
11730860_at	0.26835	0.00961	3.28309	-2.4673	0.210428	NM_014228.3		SLC6A7
11758705_s_at	0.26862	0.00963	-3.28207	-2.4688	-0.184704	DB525209		PTPDC1
11754538_x_at	0.26862	0.00963	3.28169	-2.4694	0.19037	BM971593		SLC9A5
11742819_at	0.26862	0.00964	3.28139	-2.4698	0.196263	CR456952.1		PLAUR
11740028_a_at	0.26877	0.00965	-3.28068	-2.4709	-0.260004	AY292864.1		CREM
11752041_a_at	0.26884	0.00966	3.28017	-2.4717	0.203823	AB094094.1		C2CD2L
11748529_x_at	0.26885	0.00966	-3.27978	-2.4722	-0.190528	U28979.1		CASP4
11758027_s_at	0.26895	0.00967	-3.27921	-2.4731	-0.251603	CD243255		HOOK1
11726869_a_at	0.26908	0.0097	3.2775	-2.4756	0.346799	NM_001042680.1		MFSD12
11746654_x_at	0.26908	0.0097	3.27735	-2.4759	0.288447	AB295039.1		HIF3A
11762204_a_at	0.26908	0.00971	3.27666	-2.4769	0.334023	AK298783.1		ACOT8
11731101_at	0.26908	0.00971	-3.27648	-2.4772	-0.214811	NM_033316.3		MFI2
11741032_a_at	0.26908	0.00971	-3.27644	-2.4772	-0.187861	AK290577.1		HMMR
11717891_a_at	0.26908	0.00972	-3.27606	-2.4778	-0.219228	BC023505.2		ECM1
11729851_a_at	0.26908	0.00972	3.27603	-2.4778	0.289019	NM_018059.4		RADIL
11755611_a_at	0.26908	0.00972	3.27571	-2.4783	0.232236	AJ295747.1		PFKFB3
11755657_s_at	0.26908	0.00972	-3.2757	-2.4783	-0.270928	AK126726.1		DMXL1
11732108_x_at	0.2692	0.00973	3.27499	-2.4794	0.239037	NM_000761.3		CYP1A2
11729649_at	0.2692	0.00974	3.27473	-2.4798	0.277514	NM_001083116.1		PRF1
11736394_x_at	0.26922	0.00976	3.27342	-2.4817	0.244111	NM_001012718.1		IL32
11753338_x_at	0.26922	0.00976	3.27328	-2.4819	0.222421	AK299379.1		FHL1
11744683_s_at	0.26922	0.00977	3.27261	-2.4829	0.2109	BC007924.2		FKBP4
11757886_s_at	0.26922	0.00977	-3.27255	-2.483	-0.309434	DB349900		SRBD1
11726895_a_at	0.26922	0.00978	-3.27226	-2.4834	-0.237978	BC057800.1		IRAK3
11754334_s_at	0.26922	0.00978	3.2722	-2.4835	0.763968	BG925205		EGR1
11737918_a_at	0.26922	0.00978	3.27183	-2.4841	0.236969	BC104812.1		PTPRS
11757445_s_at	0.26922	0.00979	-3.27131	-2.4849	-0.216721	BI492463		PTEN
11724610_a_at	0.26922	0.0098	3.27055	-2.486	0.243276	NM_001951.3		E2F5
11748003_a_at	0.26922	0.0098	-3.27051	-2.486	-0.230045	AK302527.1		IFI44
11755592_s_at	0.26922	0.00981	-3.2702	-2.4865	-0.234681	BC044931.2		DNAJC24
11754465_s_at	0.26922	0.00982	3.26976	-2.4872	0.197125	AK074146.1		LOC100233156 /// LOC105379554 /// MAFIP /// TEKT4P2
11715811_s_at	0.26922	0.00982	3.26973	-2.4872	0.184541	CA314002		MLLT6
11751009_s_at	0.26922	0.00983	-3.26902	-2.4883	-0.238727	AK293626.1		IK
11736027_a_at	0.26922	0.00983	-3.26896	-2.4884	-0.219764	BC126253.1		ADAM10
11738703_a_at	0.26922	0.00983	-3.26882	-2.4886	-0.180788	NM_014288.3		ITGB3BP
11740155_a_at	0.26922	0.00983	3.26873	-2.4887	0.20476	AF403479.1		SH2D1B
11742128_x_at	0.26938	0.00986	-3.26723	-2.4909	-0.191684	NM_144780.1		DEGS1
11719678_a_at	0.26938	0.00986	-3.2671	-2.4911	-0.203444	U46837.1		MED21
11726393_at	0.26938	0.00986	-3.26706	-2.4912	-0.224985	BU742508		FGD4
11745889_a_at	0.26938	0.00987	3.26658	-2.4919	0.251272	AK294464.1		KIDINS220
11742315_s_at	0.26938	0.00987	-3.26651	-2.492	-0.205072	NM_138616.2		RHCE /// RHD
11762988_at	0.26938	0.00988	3.26598	-2.4928	0.411198	EU427376.1		YME1L1
11729568_at	0.26938	0.00988	3.26591	-2.4929	0.262735	NM_001101346.1		LINC00922
11762934_at	0.26948	0.00989	3.26503	-2.4942	0.192025	AF427619.1		CD300LG
11724481_a_at	0.26948	0.0099	3.26469	-2.4947	0.20571	NM_004772.2		NREP
11756903_a_at	0.26948	0.0099	-3.26447	-2.495	-0.207196	BC051191.1		HHAT
11724661_x_at	0.26948	0.00991	3.26387	-2.4959	0.200831	AK292191.1		PAX8
11739728_a_at	0.26948	0.00991	-3.2638	-2.496	-0.221948	BC001052.2		RECQL
11718842_a_at	0.26948	0.00991	-3.2636	-2.4964	-0.237069	BC058845.1		C16orf62
11729812_at	0.26948	0.00992	-3.26302	-2.4972	-0.273192	BC078661.1		ZADH2
11726865_a_at	0.26948	0.00993	3.26278	-2.4976	0.213641	BC106761.2		FOXO4
11752756_s_at	0.26948	0.00993	3.26255	-2.4979	0.206553	AK292544.1		TBC1D26 /// TBC1D28
11723972_a_at	0.2697	0.00995	-3.26146	-2.4995	-0.200192	BC032650.1		APTX
11715806_a_at	0.2697	0.00995	-3.26137	-2.4997	-0.202757	NM_003009.2		SEPW1
11721321_x_at	0.26981	0.00996	-3.26074	-2.5006	-0.243193	NM_020408.3		LYRM4
11727920_a_at	0.27021	0.00998	-3.25936	-2.5027	-0.213525	NM_012383.4		OSTF1
11743708_at	0.27021	0.00998	3.25913	-2.503	0.272453	AI694345		SYCP2
11734826_s_at	0.27042	0.01	-3.25795	-2.5048	-0.348152	AK091222.1		SPRED1
11747702_a_at	0.27042	0.01	-3.2574	-2.5056	-0.265434	AK292333.1		RASSF8
11741276_s_at	0.27042	0.01	-3.25739	-2.5056	-0.230195	BC054487.1		TMEM144
11729958_at	0.27042	0.01	3.25727	-2.5058	0.260654	NM_001144952.1		SDK2
11725357_a_at	0.27049	0.01	-3.2565	-2.5069	-0.229624	AF226056.1		PRTFDC1
11754546_a_at	0.27049	0.01	-3.2561	-2.5075	-0.26976	AK225415.1		TMEM25
11740063_a_at	0.27049	0.01	-3.25607	-2.5076	-0.283603	AK055642.1		CAMK2D
11762017_at	0.27068	0.0101	3.25457	-2.5098	0.208033	BC047916.1		SCUBE1
11741318_a_at	0.27068	0.0101	3.25367	-2.5112	0.287996	BC074752.2		KCNJ1
11762754_at	0.27068	0.0101	3.25358	-2.5113	0.334003	BC005220.1		CCT8
11758191_s_at	0.27068	0.0101	-3.25347	-2.5115	-0.204892	AV755925		MEX3C
11735561_at	0.27068	0.0101	-3.25337	-2.5116	-0.241295	NM_001145129.1		ZNF192P1
11758227_s_at	0.27068	0.0101	-3.25304	-2.5121	-0.181269	BM013770		ROBO1
11734811_a_at	0.27068	0.0101	3.25293	-2.5123	0.323198	AF139463.1		EGR2
11739784_a_at	0.27068	0.0101	3.2529	-2.5123	0.20019	NM_198396.1		CACNA1G
11736808_a_at	0.27075	0.0101	-3.2524	-2.513	-0.213676	NM_003371.3		VAV2
11724037_at	0.27094	0.0101	3.2516	-2.5142	0.599918	NM_000963.2		PTGS2
11723370_s_at	0.27095	0.0101	3.25125	-2.5148	0.207367	NM_001080420.1		SHANK3
11746199_a_at	0.27108	0.0101	-3.2503	-2.5162	-0.231359	AA524199		METTL9
11722499_a_at	0.27108	0.0101	-3.25027	-2.5162	-0.218045	BC136740.1		LYSMD3
11733658_a_at	0.2718	0.0102	3.24825	-2.5192	0.210691	NM_182833.1		GDPD4
11727540_a_at	0.27197	0.0102	-3.24748	-2.5204	-0.194128	BC030716.1		INTS7
11753801_x_at	0.27197	0.0102	3.24667	-2.5216	0.182217	AY423624.1		LOC100128356
11760148_at	0.27197	0.0102	3.24665	-2.5216	0.230742	AK297862.1		ISCU
11741727_a_at	0.27197	0.0102	-3.24603	-2.5225	-0.217997	BC027605.2		NEDD1
11747015_a_at	0.27197	0.0102	3.24585	-2.5228	0.257913	AK294639.1		PGAP3
11755901_x_at	0.27197	0.0102	-3.2457	-2.523	-0.175669	BC111563.1		AHCYL1
11758929_at	0.27197	0.0102	-3.24524	-2.5237	-0.211501	U18422.1		TFDP2
11764165_at	0.27197	0.0102	3.24515	-2.5239	0.208964	BF435367		---
11735726_a_at	0.27202	0.0102	3.24432	-2.5251	0.183764	BC143402.1		SERPINB13
11756427_x_at	0.27202	0.0102	-3.24411	-2.5254	-0.201563	BC029633.1		ARL16
11756002_a_at	0.27202	0.0102	-3.24401	-2.5256	-0.301447	BC144532.1		NBEAL1
11761904_a_at	0.27239	0.0102	3.24282	-2.5273	0.223268	BC064632.1		MCF2L2
11728173_at	0.27246	0.0103	3.24232	-2.5281	0.203447	NM_198722.2		AMIGO3 /// GMPPB
11747827_a_at	0.2729	0.0103	3.24084	-2.5303	0.263405	AK293258.1		KLHL17
11716479_s_at	0.2729	0.0103	3.24063	-2.5306	0.227707	NM_000129.3		F13A1
11719238_a_at	0.27382	0.0103	-3.23815	-2.5343	-0.21745	NM_024580.5		EFTUD1
11737770_a_at	0.27382	0.0103	3.23785	-2.5348	0.206609	NM_030643.3		APOL4
11740245_a_at	0.27417	0.0104	3.23644	-2.5369	0.226269	J03802.1		PTHLH
11734241_at	0.27417	0.0104	3.23637	-2.537	0.241566	NM_153209.3		KIF19
11741353_a_at	0.27435	0.0104	3.23454	-2.5397	0.336293	AK300634.1		ESM1
11733002_s_at	0.27435	0.0104	-3.23439	-2.5399	-0.187029	NM_000303.2		PMM2
11755312_a_at	0.27435	0.0104	-3.23424	-2.5402	-0.205771	AF174605.1		FBXO25
11733300_at	0.27435	0.0104	3.23422	-2.5402	0.254251	NM_152310.1		ELOVL3
11733480_x_at	0.27435	0.0104	-3.23417	-2.5403	-0.210818	NM_017569.3		SUPT20H
11745236_a_at	0.27435	0.0104	-3.23388	-2.5407	-0.245539	BC008379.1		DPYD
11731795_at	0.27435	0.0104	-3.23361	-2.5411	-0.228706	NM_173567.4		EPHX4
11715506_a_at	0.27484	0.0104	-3.23195	-2.5436	-0.200482	NM_001005333.1		MAGED1
11741232_a_at	0.27484	0.0104	-3.2318	-2.5438	-0.215105	NM_001037278.1		GGPS1
11753599_x_at	0.27484	0.0104	3.23148	-2.5443	0.19448	AF220153.1		FHL1
11758563_at	0.27519	0.0105	-3.23022	-2.5462	-0.273248	AW074417		METTL21A
11726494_a_at	0.27519	0.0105	-3.22948	-2.5473	-0.266732	NM_145204.2		SENP8
11723442_at	0.27519	0.0105	3.22945	-2.5473	0.20227	BM680394		EPHA4
11717126_at	0.27519	0.0105	3.22934	-2.5475	0.192042	BP397353		SH3PXD2A
11725698_x_at	0.27519	0.0105	-3.229	-2.548	-0.229068	BC032729.1		XIAP
11723498_a_at	0.27557	0.0105	3.22781	-2.5498	0.228574	BC101265.1		RHBDD1
11729012_at	0.27566	0.0105	3.22727	-2.5506	0.284028	NM_194302.2		CFAP65
11721391_at	0.27588	0.0105	3.22642	-2.5518	0.178418	NM_014726.2		TBKBP1
11723963_a_at	0.27589	0.0105	-3.22609	-2.5523	-0.259445	BC012392.1		AGA
11715175_x_at	0.27608	0.0105	3.2253	-2.5535	0.236954	NA	63053514	KRTAP10-3	NA
11742177_at	0.27609	0.0105	3.22479	-2.5543	0.2142	BC125198.1		KRTAP12-4
11728622_a_at	0.27609	0.0105	3.22463	-2.5545	0.180021	NM_198317.1		KLHL17
11722673_at	0.27631	0.0106	3.22379	-2.5558	0.213086	AK021881.1		HIF3A
11729239_x_at	0.27672	0.0106	-3.22253	-2.5576	-0.225734	NM_001321.1		CSRP2
11736551_x_at	0.27761	0.0106	-3.22018	-2.5612	-0.350753	NM_002908.2		REL
11746071_at	0.27781	0.0106	-3.21894	-2.563	-0.257225	AK294309.1		LOC100288504
11744081_at	0.27781	0.0106	3.21863	-2.5635	0.238809	CR607375.1		FBXW5
11745252_at	0.27781	0.0107	3.2185	-2.5637	0.210686	BC104998.1		LINC00346
11763167_x_at	0.27781	0.0107	3.2184	-2.5638	0.198018	AK293945.1		MARS
11747434_a_at	0.2781	0.0107	3.21669	-2.5664	0.17531	AK290697.1		LOC647859 /// OCLN
11729009_at	0.2781	0.0107	3.21665	-2.5664	0.277334	BC132833.1		MYLK4
11721452_a_at	0.2781	0.0107	-3.21636	-2.5669	-0.212975	NM_022496.3		ACTR6
11748216_a_at	0.2781	0.0107	-3.21633	-2.5669	-0.206726	AK293729.1		STAU2
11722203_s_at	0.2781	0.0107	-3.21585	-2.5676	-0.24395	BC041691.1		FBXO22
11724559_at	0.2781	0.0107	3.21399	-2.5704	0.206172	NM_002068.2		GNA15
11723785_s_at	0.2781	0.0107	-3.21389	-2.5706	-0.208812	NM_014988.2		LIMCH1
11763996_at	0.2781	0.0107	-3.21384	-2.5706	-0.314219	AI694129		FBXL17
11731074_at	0.2781	0.0107	-3.21362	-2.571	-0.317603	NM_005023.3		PGGT1B
11758268_s_at	0.2781	0.0107	3.21337	-2.5713	0.18025	AA861256		MEST
11760371_at	0.2781	0.0107	3.21318	-2.5716	0.250536	AK295906.1		LOC100507516
11731240_at	0.2781	0.0107	3.21318	-2.5716	0.256594	AK292853.1		GRHL2
11730638_at	0.2781	0.0108	3.21267	-2.5724	0.228199	NM_014907.1		FRMPD1
11729166_a_at	0.2781	0.0108	-3.21252	-2.5726	-0.175271	BI818156		DCTD
11741405_a_at	0.2781	0.0108	3.21221	-2.5731	0.211421	NM_001136137.1		RPL28
11745007_s_at	0.2781	0.0108	-3.21216	-2.5731	-0.335766	BC049836.1		SDC2
11737633_at	0.2781	0.0108	3.21203	-2.5733	0.295304	NM_001037814.1		GAB4
11729491_s_at	0.2781	0.0108	3.21181	-2.5737	0.235189	BC132923.1		PPFIA4
11751355_a_at	0.27845	0.0108	3.21069	-2.5753	0.274745	AK296634.1		CEACAM7
11736519_x_at	0.27847	0.0108	-3.21023	-2.576	-0.181795	NM_144970.1		CXorf38
11726091_at	0.27847	0.0108	3.20984	-2.5766	0.251147	NM_001128159.1		VPS53
11744747_a_at	0.27847	0.0108	-3.20939	-2.5773	-0.173101	BC032143.2		FGFR1OP2
11730728_a_at	0.27847	0.0108	-3.20935	-2.5773	-0.201197	BC022853.1		UBA3
11738194_at	0.27898	0.0108	3.20759	-2.58	0.233399	NM_016943.2		TAS2R3
11739386_at	0.27898	0.0108	-3.20756	-2.58	-0.191895	NM_024529.3		CDC73
11726427_at	0.2791	0.0109	3.2064	-2.5818	0.262701	NM_005458.6		GABBR2
11739953_at	0.2791	0.0109	3.20632	-2.5819	0.241556	BC136323.1		ZNF14
11729500_a_at	0.2791	0.0109	3.20631	-2.5819	0.238773	AB042554.1		HHATL
11727903_a_at	0.27926	0.0109	-3.20562	-2.5829	-0.18706	U81379.3		IL13RA1
11748276_a_at	0.27943	0.0109	3.20428	-2.5849	0.201215	AF328554.2		CANT1
11753446_x_at	0.27943	0.0109	-3.20354	-2.586	-0.275836	BT019785.1		HMOX1
11719298_x_at	0.27943	0.0109	3.20344	-2.5862	0.178757	NM_001006617.1		MAPKAP1
11759652_x_at	0.27943	0.0109	3.20317	-2.5866	0.232124	AY942048.1		IGKV1-12 /// IGKV1D-12
11726037_a_at	0.27943	0.0109	-3.20305	-2.5868	-0.215542	BC024188.2		C3orf38
11734530_x_at	0.27943	0.0109	-3.20252	-2.5876	-0.190712	NM_001098478.1		HLA-F
11715435_s_at	0.27943	0.0109	-3.20212	-2.5882	-0.31357	NM_000362.4		TIMP3
11752864_a_at	0.27943	0.0109	-3.20199	-2.5883	-0.263544	AK293376.1		FER
11730455_a_at	0.27943	0.0109	-3.20198	-2.5884	-0.307772	NM_012243.1		SLC35A3
11749999_x_at	0.27943	0.0109	3.2019	-2.5885	0.199654	BC171904.1		TMEM150B
11727009_at	0.27943	0.0109	-3.20166	-2.5888	-0.301792	NM_001182.3		ALDH7A1
11725728_a_at	0.27946	0.011	-3.20109	-2.5897	-0.252817	NM_017860.3		C1orf56
11728580_x_at	0.27946	0.011	3.20094	-2.5899	0.23589	NM_000683.3		ADRA2C
11743500_x_at	0.2799	0.011	-3.19964	-2.5919	-0.200402	DR005787		PSMG4
11762833_x_at	0.27993	0.011	3.19905	-2.5928	0.193248	AK303618.1		LOC642846
11764182_at	0.27993	0.011	3.19891	-2.593	0.207652	AI732204		---
11726980_a_at	0.28131	0.011	3.19553	-2.598	0.186947	NM_198406.1		PAQR6
11756293_a_at	0.28149	0.0111	-3.1948	-2.5991	-0.286433	BG413410		UFSP2
11720766_a_at	0.28158	0.0111	-3.19427	-2.5999	-0.235324	AK074529.1		METTL9
11758014_s_at	0.28158	0.0111	3.19394	-2.6004	0.187681	AI086151		TGFBR1
11724959_s_at	0.28239	0.0111	3.1918	-2.6036	0.182563	NM_012395.2		CDK14
11740045_a_at	0.28239	0.0111	-3.1914	-2.6042	-0.203168	NM_001100165.1		PHACTR2
11761195_x_at	0.28239	0.0111	3.19079	-2.6051	0.235534	BC028219.1		TGOLN2
11729539_a_at	0.28239	0.0111	-3.19076	-2.6052	-0.200192	NM_144981.1		IMMP1L
11743634_s_at	0.28239	0.0111	-3.19048	-2.6056	-0.251138	CB243481		MLLT4
11757224_s_at	0.28239	0.0111	-3.19023	-2.606	-0.196851	NR_003920.1		C4orf27 /// LOC389705
11743281_a_at	0.28239	0.0111	3.18989	-2.6065	0.215287	CK725054		WNK1
11741916_at	0.28289	0.0112	3.18846	-2.6086	0.263357	BC103892.1		OR12D3
11756180_a_at	0.28291	0.0112	-3.18759	-2.6099	-0.201403	AL079451		PHKB
11723255_x_at	0.28291	0.0112	-3.18736	-2.6102	-0.185982	AF030424.1		HAT1
11749652_a_at	0.28291	0.0112	3.18709	-2.6107	0.201729	AK300291.1		ZBTB21
11750554_a_at	0.28291	0.0112	-3.18625	-2.6119	-0.197049	BC144285.1		NEDD4
11721292_a_at	0.28291	0.0112	-3.18623	-2.6119	-0.256325	AF124491.1		GIT2
11726708_a_at	0.28291	0.0112	3.18619	-2.612	0.192526	NM_001093767.1		FAM195B
11716948_s_at	0.28291	0.0112	3.18609	-2.6121	0.224736	AK027788.1		TM9SF3
11746249_a_at	0.28291	0.0112	3.18586	-2.6125	0.257228	AK303897.1		PIFO
11730774_at	0.28327	0.0112	-3.18443	-2.6146	-0.182364	BC019328.1		TMEM14A
11736300_a_at	0.28327	0.0113	-3.18404	-2.6152	-0.283108	NM_001128150.1		ORMDL1
11740680_s_at	0.28327	0.0113	-3.18382	-2.6155	-0.29422	NM_138618.2		RHCE /// RHD
11735828_at	0.28327	0.0113	3.1838	-2.6156	0.336175	NM_014588.4		VSX1
11758852_at	0.2836	0.0113	3.18265	-2.6173	0.336572	BM683357		ATAD3C /// VWA1
11731780_at	0.2836	0.0113	3.18243	-2.6176	0.231088	NM_000847.4		GSTA3
11748341_a_at	0.28363	0.0113	3.18175	-2.6186	0.301211	AK293741.1		TPP1
11760782_at	0.28363	0.0113	3.18139	-2.6192	0.223081	BC032956.1		MGAT4EP
11716074_x_at	0.28363	0.0113	-3.18084	-2.62	-0.2018	NM_001537.2		HSBP1
11722933_at	0.28363	0.0113	-3.18066	-2.6203	-0.331064	CA429418		CHML
11720567_a_at	0.28363	0.0113	3.17965	-2.6218	0.301447	AK289757.1		PPFIA3
11746714_a_at	0.28363	0.0113	-3.17941	-2.6221	-0.258228	AK304244.1		NUP43
11720532_s_at	0.28363	0.0113	-3.17931	-2.6223	-0.251785	NM_018325.2		C9orf72
11722914_s_at	0.28363	0.0114	-3.17833	-2.6238	-0.195063	AK291764.1		BMPR1A
11755697_a_at	0.28363	0.0114	3.17814	-2.6241	0.220413	AK123055.1		LGR6
11748834_a_at	0.28363	0.0114	-3.17792	-2.6244	-0.217062	AK301423.1		CRBN
11726298_s_at	0.28363	0.0114	-3.17755	-2.6249	-0.232346	AF342815.1		LGALS8
11752623_x_at	0.28363	0.0114	-3.17684	-2.626	-0.224607	DQ124708.1		PXK
11723418_a_at	0.28363	0.0114	3.17676	-2.6261	0.226626	AF039555.1		VSNL1
11758010_s_at	0.28363	0.0114	3.17631	-2.6268	0.208482	BX111915		GOLGA6L1 /// GOLGA6L22 /// GOLGA6L6
11722607_at	0.28363	0.0114	-3.17603	-2.6272	-0.272543	AK091635.1		UFSP2
11738311_at	0.28363	0.0114	3.17596	-2.6273	0.198827	NM_207444.2		C15orf53
11720573_at	0.28363	0.0114	-3.1756	-2.6279	-0.184068	NM_005603.3		ATP8B1
11761727_x_at	0.28363	0.0114	3.17522	-2.6284	0.289431	AK297860.1		AQP7
11728928_a_at	0.28363	0.0114	3.17406	-2.6302	0.200792	NM_014427.4		CPNE7
11720762_a_at	0.28363	0.0114	-3.17401	-2.6302	-0.235458	NM_012175.3		FBXO3
11753034_a_at	0.28363	0.0114	3.1737	-2.6307	0.226527	BC110888.1		ZNFX1
11730662_a_at	0.28363	0.0115	3.17316	-2.6315	0.233679	NM_001007279.1		RASL10A
11758681_s_at	0.28363	0.0115	-3.17219	-2.633	-0.18828	AI858938		ASCC1
11719677_a_at	0.28363	0.0115	-3.17207	-2.6331	-0.210777	NM_004264.3		MED21
11735181_a_at	0.28363	0.0115	3.17199	-2.6333	0.213078	NM_004405.3		DLX2
11758707_s_at	0.28363	0.0115	-3.17188	-2.6334	-0.312623	DB526316		SIMC1
11726868_x_at	0.28363	0.0115	-3.17154	-2.6339	-0.212056	NM_000082.3		ERCC8
11721730_at	0.28363	0.0115	-3.1715	-2.634	-0.274998	NM_019022.3		TMX3
11746236_a_at	0.28363	0.0115	-3.17147	-2.634	-0.214851	CB850732		LIN37
11752382_a_at	0.28363	0.0115	3.17124	-2.6344	0.183361	AK297005.1		S1PR1
11720779_a_at	0.28363	0.0115	3.17087	-2.6349	0.248448	CR610643.1		KLHL22
11731407_x_at	0.28363	0.0115	-3.16968	-2.6367	-0.231847	AK290427.1		IFIT3
11732003_a_at	0.28363	0.0115	3.16938	-2.6372	0.199811	NM_001145146.1		CRHR1 /// MGC57346-CRHR1
11741247_a_at	0.28363	0.0115	-3.16895	-2.6378	-0.197721	AK316425.1		CPS1
[truncated: 47,396 more rows]
